# Supplementary material for: Structure-Based Design of a Novel Class of Autotaxin Inhibitors Based on Endogenous Allosteric Modulators
Source: PubMed Central journal article supplement (PMC9059126; doi:10.1021/acs.jmedchem.2c00368), 2022-04-20
Supplement: jm2c00368_si_001.pdf [file jm2c00368_si_001.pdf]

## Supporting Information

### Structure-Based Design of a Novel Class of Autotaxin Inhibitors Based on Endogenous Allosteric Modulators

Jennifer M. Clark,<sup>a</sup> Fernando Salgado-Polo,<sup>b</sup> Simon J. F. Macdonald,<sup>c</sup> Tim N. Barrett,<sup>d</sup>  
Anastassis Perrakis\*<sup>b</sup> and Craig Jamieson\*<sup>a</sup>

<sup>a</sup>Department of Pure and Applied Chemistry, University of Strathclyde, 295 Cathedral Street,  
Glasgow, G1 1XL, United Kingdom

<sup>b</sup>Oncode Institute and Division of Biochemistry, Netherlands Cancer Institute, Plesmanlaan  
121, 1066CX, Amsterdam, The Netherlands

<sup>c</sup>Medicines Design, GlaxoSmithKline R&D, Stevenage, Hertfordshire, SG1 2NY, United  
Kingdom

[\\*craig.jamieson@strath.ac.uk](mailto:craig.jamieson@strath.ac.uk); [\\*a.perrakis@nki.nl](mailto:a.perrakis@nki.nl)

## Contents

|                                                                                                          |            |
|----------------------------------------------------------------------------------------------------------|------------|
| <b>1. Additional Figures</b>                                                                             | <b>S2</b>  |
| <b>2. General Procedures</b>                                                                             | <b>S4</b>  |
| <b>3. Experimental Details for all intermediates and final compounds</b>                                 | <b>S8</b>  |
| <b>4. <sup>1</sup>H NMR, <sup>13</sup>C NMR, <sup>11</sup>B NMR, <sup>19</sup>F NMR and HRMS Spectra</b> | <b>S24</b> |
| <b>5. References</b>                                                                                     | <b>S76</b> |

## 1. Additional Figures

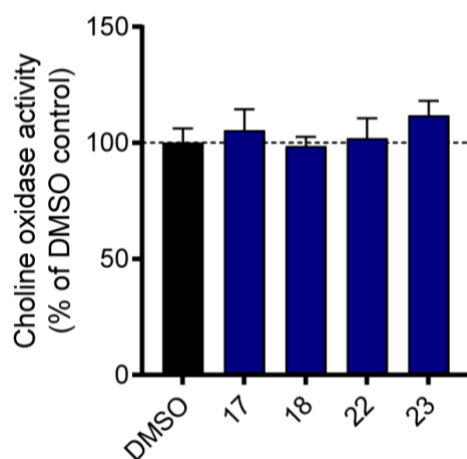

**Figure S1.** Internal control to assess the potential reactivity of different warheads with the choline oxidase-coupled activity assay. 50  $\mu$ M choline chloride was incubated with all reaction components in the absence of ATX and LPC.

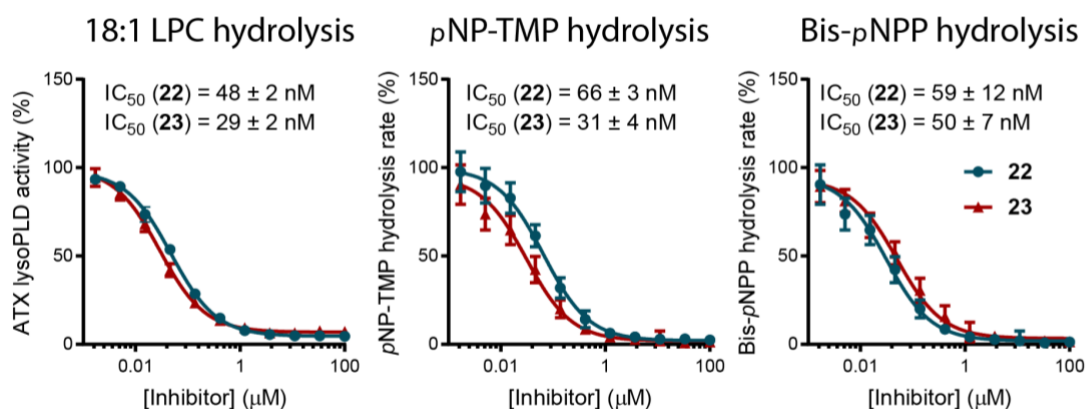

**Figure S2.** Determination of the potency of **22** and **23** in the hydrolysis of the physiological ATX substrate 18:1 LPC (150  $\mu$ M), and the synthetic nucleotide substrates *p*NP-TMP (1 mM) and Bis-*p*NPP (1 mM).  $IC_{50}$  values are indicated for inhibition in the presence of 20 nM ATX in all cases. The mean of three independent experiments  $\pm$  s.d. is plotted.

## 2. General Procedures

### General Procedure A – Alkylation

For example, for the preparation of *tert*-butyl (3-(4-sulfamoylphenoxy)propyl)carbamate **S1**

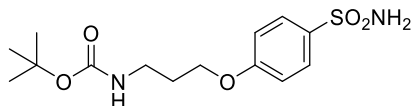

To a round-bottomed flask equipped with a reflux condenser was added 4-hydroxybenzenesulfonamide (200 mg, 1.15 mmol, 1.1 equiv),  $K_2CO_3$  (158 mg, 1.15 mmol, 1.1 equiv) and DMF (5 mL). The reaction mixture was heated to 80 °C and stirred for 20 minutes before addition of *tert*-butyl (3-iodopropyl)carbamate (300 mg, 1.05 mmol, 1.0 equiv). Reaction was stirred overnight at 80 °C. The reaction mixture was diluted with  $H_2O$  (80 mL) and the organics were extracted with EtOAc (2 x 30 mL) and washed with brine (80 mL). The organics were dried with a hydrophobic frit and concentrated *in vacuo* and purified by column chromatography on silica (2% MeOH/DCM) to afford the desired product **S1** as a white solid (117 mg, 35%).  $^1H$  NMR (DMSO- $d_6$ , 500 MHz): 7.73 (d,  $J = 8.9$  Hz, 2H), 7.18 (s, 2H), 7.06 (d,  $J = 8.9$  Hz, 2H), 6.90-6.89 (m, 1H), 4.04 (t,  $J = 6.3$  Hz, 2H), 3.08 (q,  $J = 6.6$  Hz, 2H), 1.84 (quint.,  $J = 6.5$  Hz, 2H), 1.37 (s, 9H).  $^{13}C$  NMR (DMSO- $d_6$ , 101 MHz): 161.0, 155.6, 136.1, 127.6, 114.4, 77.5, 65.7, 36.8, 29.0, 28.2.  $\nu_{max}$  (neat): 3381, 3332, 3239, 2930, 1660, 1601, 1630, 1500  $cm^{-1}$ . HRMS: exact mass calculated for  $[M+NH_4]^+$  ( $C_{14}H_{26}N_3O_5S$ ) requires 348.1588  $m/z$ , found 348.1590  $m/z$ . Consistent with previously reported data.<sup>1</sup>

### General Procedure B – Amidation

Boc deprotection for the preparation of compounds **10-16**: To a round-bottomed flask was added *tert*-butyl (3-(4-sulfamoylphenoxy)propyl)carbamate **S1** (100 mg, 0.32 mmol) and a mixture of trifluoroacetic acid (230  $\mu L$ , 3.05 mmol) and DCM (3 mL). The reaction was then

stirred at room temperature until consumption of starting material was confirmed. The reaction was concentrated *in vacuo* yielding a gum which was telescoped through to the subsequent step without further purification.

Cbz deprotection for the preparation of compounds **19-21**: To a round-bottomed flask charged with benzyl 4-(4-(4,4,5,5-tetramethyl-1,3,2-dioxaborolan-2-yl)phenoxy)piperidine-1-carboxylate **S8** (300 mg, 0.80 mmol, 1.0 equiv.) was added Pearlman's catalyst (98 mg, 20 mol %) and methanol (6 mL). The reaction was sparged with H<sub>2</sub> (balloon) for 1 minute, and stirred under an atmosphere of H<sub>2</sub> (balloon) for 5 hours. The reaction was filtered through celite, eluting MeOH. The organics were concentrated *in vacuo* and the crude material was carried through to the next step without further purification.

For compounds **10-16** and **19-21**, for example, for the preparation of (4*R*)-4-((3*R*,7*S*,10*S*,13*R*)-3,7-dihydroxy-10,13-dimethylhexadecahydro-1*H*-cyclopenta[*a*]phenanthren-17-yl)-*N*-(3-(4-sulfamoylphenoxy)propyl)pentanamide **10**

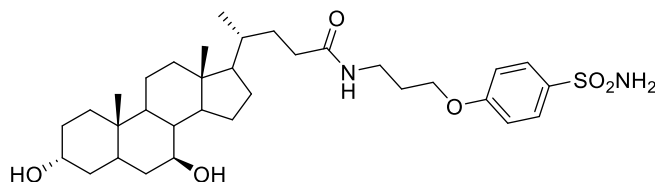

*tert*-butyl (3-(4-sulfamoylphenoxy)propyl)carbamate **S1** (100 mg, 0.44 mmol, 1.0 equiv.) was subjected to Boc deprotection conditions outlined above. To a round-bottomed flask was added ursodeoxycholic acid (UDCA, 85 mg, 0.22 mmol, 1.0 equiv) in dimethylformamide (DMF, 2 mL), *N,N*-diisopropylethylamine (DIPEA, 237  $\mu$ L, 1.36 mmol, 5.0 equiv) and then 1-[bis(dimethylamino)methylene]-1*H*-1,2,3-triazolo[4,5-*b*]pyridinium 3-oxide hexafluorophosphate (HATU, 90 mg, 0.24 mmol, 1.1 equiv). After stirring at room temperature for 15 minutes, crude intermediate 2-(4-sulfamoylphenoxy)ethan-1-aminium 2,2,2-trifluoroacetate **S1a** was added and stirred for 16 hours at room temperature. The reaction

mixture was diluted with H<sub>2</sub>O (30 mL) and the organics were extracted with EtOAc (2 x 20 mL) and washed with brine (80 mL). The organics were dried with a hydrophobic frit and concentrated *in vacuo* to a residue that was purified by column chromatography on silica (10% MeOH/DCM) to afford desired product **10** as an off-white solid (56 mg, 30% over two steps). <sup>1</sup>H NMR (DMSO-*d*<sub>6</sub>, 500 MHz): 7.84 (t, *J* = 5.5 Hz, 1H), 7.74 (d, *J* = 8.8 Hz, 2H), 7.18 (s, 2H), 7.06 (d, *J* = 8.8 Hz, 2H), 4.42 (d, *J* = 4.5 Hz, 1H), 4.05 (t, *J* = 6.2 Hz, 2H), 3.85 (d, *J* = 6.8 Hz, 1H), 3.33-3.24 (m, coincident with solvent peak), 3.20-3.16 (m, 2H), 2.11-2.06 (m, 1H), 1.99-1.91 (m, 2H), 1.87-1.81 (m, 3H), 1.76-1.72 (m, 1H), 1.68-1.63 (m, 3H), 1.49-1.26 (m, 11H), 1.22-0.91 (m, 9H), 0.89-0.87 (m, 6H), 0.60 (s, 3H). <sup>13</sup>C NMR (DMSO-*d*<sub>6</sub>, 101 MHz): 172.6, 160.9, 136.1, 127.6, 114.4, 69.7, 69.5, 65.7, 55.9, 54.7, 43.1, 43.0, 42.2, 38.7, 37.7, 37.3, 35.3, 34.9, 34.8, 33.7, 32.4, 31.7, 30.2, 28.8, 28.2, 26.7, 23.3, 20.8, 18.5, 12.0. 1 x C not observed.  $\nu_{\max}$  (neat): 3381, 2929, 2864, 1633, 1597, 1547 cm<sup>-1</sup>. HRMS: exact mass calculated for [M-H]<sup>-</sup> (C<sub>33</sub>H<sub>51</sub>N<sub>2</sub>O<sub>6</sub>S) requires 603.3473 *m/z*, found 603.3473 *m/z*.

#### General Procedure C – CMBP-Mediated Mitsunobu

For example, for the preparation of *tert*-butyl (2-(3-(4,4,5,5-tetramethyl-1,3,2-dioxaborolan-2-yl)phenoxy)ethyl)carbamate **S4**

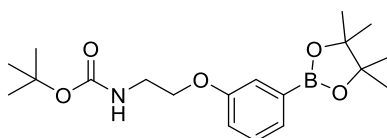

To a microwave vial was added 3-hydroxyphenyl boronic acid pinacol ester (200 mg, 0.90 mmol, 1.0 equiv.) and *N*-Boc ethanolamine (210  $\mu$ L, 1.36 mmol, 1.3 equiv.). The vial was sealed with a microwave cap, purged under N<sub>2</sub> followed by addition of anhydrous toluene (4 mL). To the vial was added CMBP (471  $\mu$ L, 1.09 mmol, 2.0 equiv.) and the reaction heated at 120 °C overnight. Reaction mixture was concentrated *in vacuo* to a residue that was purified

by column chromatography on silica (7% EtOAc in hexane) then washed with saturated  $\text{Na}_2\text{CO}_3$  (3 x 20 mL) to afford the desired product **S4** as a clear oil (183 mg, 56%).  $^1\text{H}$  NMR ( $\text{CDCl}_3$ , 500 MHz): 7.42 (d,  $J = 7.2$  Hz, 1H), 7.32-7.28 (m, 2H), 7.01-6.98 (m, 1H), 4.98 (br. s, 1H), 4.05 (t,  $J = 5.0$  Hz, 2H), 3.54-3.53 (m, 2H), 1.45 (s, 9H), 1.34 (s, 12H).  $^{13}\text{C}$  NMR ( $\text{CDCl}_3$ , 126 MHz): 159.3, 158.2, 129.2, 127.7, 120.0, 118.2, 84.0, 79.4, 67.3, 40.3, 28.6, 25.0. 1 x C bearing B not observed.  $^{11}\text{B}$  NMR ( $\text{CDCl}_3$ , 160 MHz): 30.9.  $\nu_{\text{max}}$  (neat): 3370, 2975, 2930, 1687, 1536  $\text{cm}^{-1}$ . HRMS: exact mass calculated for  $[\text{M}+\text{H}]^+$  ( $\text{C}_{19}\text{H}_{31}\text{BNO}_5$ ) requires 364.2290  $m/z$ , found 364.2289  $m/z$ .

### 3. Experimental Details for intermediates and final compounds

#### Preparation of *tert*-butyl (2-(4-sulfamoylphenoxy)ethyl)carbamate **S2**

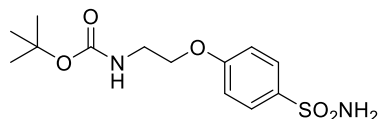

Prepared according to General Procedure A, using 4-hydroxybenzenesulfonamide (200 mg, 1.15 mmol, 1.1 equiv.), *tert*-butyl (2-bromoethyl)carbamate (235 mg, 1.04 mmol, 1.0 equiv.) K<sub>2</sub>CO<sub>3</sub> (158 mg, 1.15 mmol, 1.1 equiv.) and DMF (5 mL). The crude material was subjected to the purification outlined in General Procedure A (silica gel, 2% MeOH/DCM) to afford desired product **S2** as a white solid (117 mg, 35%). <sup>1</sup>H NMR (DMSO-*d*<sub>6</sub>, 500 MHz): 7.73 (d, *J* = 8.9 Hz, 2H), 7.19 (s, 2H), 7.07 (d, *J* = 8.9 Hz, 2H), 7.02 (t, *J* = 5.5 Hz, 1H), 4.03 (t, *J* = 5.5 Hz, 2H), 3.33-3.28 (m, coincident with solvent), 1.38 (s, 9H). <sup>13</sup>C NMR (DMSO-*d*<sub>6</sub>, 126 MHz): 160.8, 155.7, 136.3, 127.6, 114.5, 77.8, 66.8, 28.2. 1 x C not observed.  $\nu_{\max}$  (neat): 3398, 3317, 3218, 3112, 2969, 1667, 1597, 1521, 1597, 1521, 1502 cm<sup>-1</sup>. HRMS: exact mass calculated for [M+Na]<sup>+</sup> (C<sub>13</sub>H<sub>20</sub>N<sub>2</sub>O<sub>5</sub>SNa) requires 339.0985 *m/z*, found 339.0989 *m/z*.

#### Preparation of *tert*-butyl (4-(4-sulfamoylphenoxy)butyl)carbamate **S3**

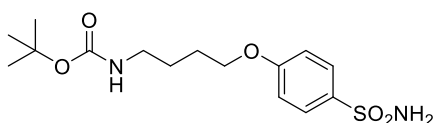

Prepared according to General Procedure A, using 4-hydroxybenzenesulfonamide (191 mg, 1.10 mmol, 1.1 equiv.), *tert*-butyl (4-iodobutyl)carbamate (300 mg, 1.00 mmol, 1.0 equiv.), K<sub>2</sub>CO<sub>3</sub> (152 mg, 1.10 mmol 1.1 equiv.) and DMF (5 mL). The crude material was subjected to the purification outlined in General Procedure A (silica gel, 60% EtOAc in petroleum ether 40-60) to afford the desired product **S3** as an off-white solid (148 mg, 39%). <sup>1</sup>H NMR (DMSO-*d*<sub>6</sub>, 500 MHz): 7.73 (d, *J* = 8.9 Hz, 2H), 7.18 (s, 2H), 7.06 (d, *J* = 8.9 Hz, 2H), 6.85-6.83 (m, 1H),



4.04 (t,  $J = 6.5$  Hz, 2H), 2.97 (app. q,  $J = 6.6$  Hz, 2H), 1.74-1.68 (m, 2H), 1.55-1.49 (m, 2H), 1.37 (s, 9H).  $^{13}\text{C}$  NMR (DMSO- $d_6$ , 101 MHz): 161.0, 155.6, 136.0, 127.6, 114.4, 77.4, 67.6, 28.2, 26.0, 25.9. 1 x C not observed.  $\nu_{\text{max}}$  (neat) 3363, 3281, 2952, 2926, 2865, 1682, 1599, 1526  $\text{cm}^{-1}$ . HRMS: exact mass calculated for  $[\text{M}+\text{Na}]^+$  ( $\text{C}_{15}\text{H}_{24}\text{N}_2\text{O}_5\text{SNa}$ ) requires 367.1298  $m/z$ , found 367.1299  $m/z$ .

Preparation of *tert*-butyl (2-(4-(4,4,5,5-tetramethyl-1,3,2-dioxaborolan-2-yl)phenoxy)ethyl)carbamate **S5**

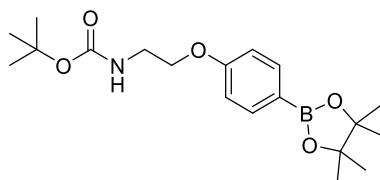

Prepared according to General Procedure C, using 4-hydroxyphenyl boronic acid pinacol ester (200 mg, 0.90 mmol, 1.0 equiv.), *N*-Boc ethanolamine (210  $\mu\text{L}$ , 1.36 mmol, 1.5 equiv.), CMBP (471  $\mu\text{L}$ , 1.09 mmol, 2.0 equiv.) in anhydrous toluene (4 mL). The crude material was subjected to the purification outlined in General Procedure C (silica gel, 0-10% EtOAc in hexanes) then washed with saturated  $\text{Na}_2\text{CO}_3$  (3 x 20 mL) to afford the desired product **S5** as a clear oil (250 mg, 77%).  $^1\text{H}$  NMR ( $\text{CDCl}_3$ , 500 MHz): 7.74 (d,  $J = 8.4$  Hz, 2H), 6.88 (d,  $J = 8.4$  Hz, 2H), 4.97 (br. s, 1H), 4.04 (t,  $J = 5.0$  Hz, 2H), 3.54-3.53 (m, 2H), 1.45 (s, 9H), 1.33 (s, 12H).  $^{13}\text{C}$  NMR ( $\text{CDCl}_3$ , 126 MHz): 161.3, 156.0, 136.7, 114.0, 83.7, 79.7, 67.2, 40.3, 28.5, 25.0. 1 x C bearing B not observed.  $^{11}\text{B}$  NMR ( $\text{CDCl}_3$ , 160 MHz): 30.9.  $\nu_{\text{max}}$  (neat): 3360, 2977, 2932, 1700, 1606, 1513  $\text{cm}^{-1}$ . HRMS: exact mass calculated for  $[\text{M}+\text{H}]^+$  ( $\text{C}_{19}\text{H}_{31}\text{BNO}_5$ ) requires 364.2290  $m/z$ , found 364.2285  $m/z$ .

Preparation of *tert*-butyl (3-(3-(4,4,5,5-tetramethyl-1,3,2-dioxaborolan-2-yl)phenoxy)propyl)carbamate **S6**

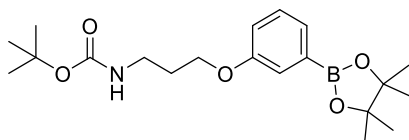

Prepared according to General Procedure C, using 3-hydroxyphenyl boronic acid pinacol ester (200 mg, 0.90 mmol, 1.0 equiv.), *tert*-butyl (3-hydroxypropyl)carbamate (238 mg, 1.36 mmol, 1.5 equiv.), CMBP (471  $\mu$ L, 1.09 mmol, 2.0 equiv.) in anhydrous toluene (4 mL). The crude material was subjected to the purification outlined in General Procedure C (silica gel, 0-7% EtOAc in hexane) then washed with saturated  $\text{Na}_2\text{CO}_3$  (3 x 20 mL) to afford the desired product **S6** as a clear oil (298 mg, 88%).  $^1\text{H}$  NMR ( $\text{CDCl}_3$ , 500 MHz): 7.40-7.39 (m, 1H), 7.32-7.31 (m, 1H), 7.28 (m, coincident with solvent peak), 7.00-6.98 (m, 1H), 4.77 (br. s., 1H), 4.05 (t, 2H,  $J = 5.9$  Hz), 3.33-3.32 (m, 2H), 1.99-1.94 (m, 2H), 1.44 (s, 9H), 1.34 (s, 12H).  $^{13}\text{C}$  NMR ( $\text{CDCl}_3$ , 126 MHz): 158.6, 156.1, 129.1, 127.5, 119.8, 118.4, 84.0, 66.0, 38.3, 29.6, 28.6, 25.0. 1 x C bearing B not observed.  $^{11}\text{B}$  NMR ( $\text{CDCl}_3$ , 128 MHz): 30.9.  $\nu_{\text{max}}$  (neat): 3375, 2980, 2932, 1688, 1534  $\text{cm}^{-1}$ . HRMS: exact mass calculated for  $[\text{M}+\text{H}]^+$  ( $\text{C}_{20}\text{H}_{33}\text{BNO}_5$ ) requires 378.2446  $m/z$ , found 378.2441  $m/z$ .

Preparation of *tert*-butyl (3-(4-(4,4,5,5-tetramethyl-1,3,2-dioxaborolan-2-yl)phenoxy)propyl)carbamate **S7**

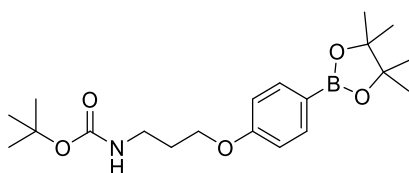

Prepared according to General Procedure C, using 4-hydroxyphenyl boronic acid pinacol ester (250 mg, 1.13 mmol, 1.0 equiv.), *tert*-butyl (3-hydroxypropyl)carbamate (257 mg, 1.47 mmol, 1.3 equiv.), CMBP (471  $\mu$ L, 1.09 mmol, 2.0 equiv.) in anhydrous toluene (4 mL). The crude material was subjected to the purification outlined in General Procedure C (silica gel, 0-7% EtOAc in hexane) then washed with saturated  $\text{Na}_2\text{CO}_3$  (3 x 20 mL) to afford the desired product

**S7** as a clear oil (250 mg, 74%).  $^1\text{H}$  NMR ( $\text{CDCl}_3$ , 500 MHz): 7.74 (d,  $J = 8.5$  Hz, 2H), 6.88 (d,  $J = 8.5$  Hz, 2H), 4.76 (br. s, 1H), 4.04 (t,  $J = 6.0$  Hz, 2H), 3.33-3.31 (m, 2H), 2.00-1.95 (m, 2H) 1.44 (s, 9H), 1.33 (s, 12H).  $^{13}\text{C}$  NMR ( $\text{CDCl}_3$ , 101 MHz): 161.5, 156.1, 136.7, 114.0, 83.7, 79.4, 65.7, 38.1, 29.6, 28.5, 25.0. 1 x C bearing B not observed.  $^{11}\text{B}$  NMR ( $\text{CDCl}_3$ , 128 MHz): 31.7.  $\nu_{\text{max}}$  (neat): 3357, 2977, 2932, 1694, 1606, 1517  $\text{cm}^{-1}$ . HRMS: exact mass calculated for  $[\text{M}+\text{H}]^+$  ( $\text{C}_{20}\text{H}_{33}\text{BNO}_5$ ) requires 378.2446  $m/z$ , found 378.2441  $m/z$ .

Preparation of benzyl (*R*)-3-(4-(4,4,5,5-tetramethyl-1,3,2-dioxaborolan-2-yl)phenoxy)pyrrolidine-1-carboxylate **S9**

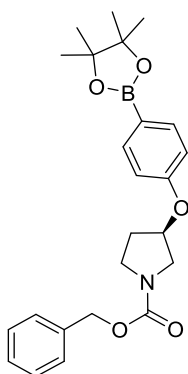

Prepared according to General Procedure C, using (*S*)-benzyl 3-hydroxypyrrolidine-1-carboxylate (301 mg, 1.36 mmol, 1.5 equiv.) 4-hydroxyphenol boronic acid pinacol ester (200 mg, 0.91 mmol, 1.0 equiv.), CMBP (477  $\mu\text{L}$ , 1.82 mmol, 2.0 equiv.) in anhydrous toluene (5 mL). The crude material was subjected to the purification outlined in General Procedure C (silica gel, 0-12% EtOAc in hexanes) to afford the desired product **S9** as a yellow gum (298 mg, 79 %).  $^1\text{H}$  NMR ( $\text{CDCl}_3$ , 500 MHz, 300 K): 7.75 (d, 2H,  $J = 8.0$  Hz), 7.39-7.30 (m, 5H), 6.85 (d, 2H,  $J = 8.0$  Hz), 5.19-5.09 (m, 2H), 4.95 (br. s, 1H), 3.72-3.56 (m, 4H), 2.23-2.20 (m, 1H), 2.15-2.06 (m, 1H), 1.33 (s, 12H). Rotameric mixture observed.  $^1\text{H}$  NMR Variable Temperature ( $\text{DMSO}-d_6$ , 400 MHz, 373 K): 7.62 (d, 2H,  $J = 8.5$  Hz), 7.35-7.28 (m, 5H), 6.93 (d, 2H,  $J = 8.5$  Hz), 5.09-5.04 (m, 3H), 3.69-3.65 (m, 1H), 3.57-3.47 (m, 3H), 2.25-2.16 (m, 1H), 2.11-2.05 (m, 1H), 1.30 (s, 12H).  $^{13}\text{C}$  NMR ( $\text{CDCl}_3$ , 126 MHz, 300 K): 159.8, 159.7,

154.98, 154.96, 137.0, 136.9, 136.8, 128.6, 128.08, 128.06, 114.9, 83.7, 76.1, 75.3, 67.0, 52.1, 51.6, 44.5, 44.1, 31.6, 30.8, 25.0. 1 x C bearing B not observed. Rotameric mixture observed.  $^{13}\text{C}$  NMR Variable Temperature (DMSO- $d_6$ , 101 MHz, 373 K): 159.2, 153.6, 136.7, 135.7, 127.8, 127.1, 126.8, 114.7, 82.9, 75.5, 65.4, 50.9, 43.4, 30.1, 24.1. 1 x C bearing B not observed.  $^{11}\text{B}$  NMR ( $\text{CDCl}_3$ , 128 MHz): 30.6.  $\nu_{\text{max}}$  (neat): 2979, 2887, 1700, 1605, 1415  $\text{cm}^{-1}$ . HRMS: exact mass calculated for  $[\text{M}+\text{H}]^+$  ( $\text{C}_{24}\text{H}_{31}\text{BNO}_5$ ) requires 424.2290  $m/z$ , found 424.2278  $m/z$ .

Preparation of (*S*)-benzyl 3-(4-(4, 4, 5, 5-tetramethyl-1, 3, 2-dioxaborolan-2-yl)phenoxy)pyrrolidine-1-carboxylate **S10**

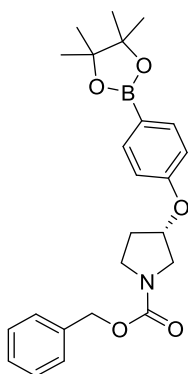

Prepared according to General Procedure C, using (*R*)-(-)-1-Cbz-3-hydroxypyrrolidine (301 mg, 1.36 mmol, 1.5 equiv.) 4-hydroxyphenol boronic acid pinacol ester (200 mg, 0.91 mmol, 1.0 equiv.), CMBP (477  $\mu\text{L}$ , 1.82 mmol, 2.0 equiv.) in anhydrous toluene (5 mL). The crude material was subjected to the purification outlined in General Procedure C (silica gel, 0-12% EtOAc in hexane) to afford the desired product **S10** as a pale yellow gum (307 mg, 77%).  $^1\text{H}$  NMR Variable Temperature (DMSO- $d_6$ , 400 MHz, 373 K): 7.63 (d, 2H,  $J = 8.3$  Hz), 7.37-7.30 (m, 5H), 6.94 (d, 2H,  $J = 8.3$  Hz), 5.10 (br. s, 2H), 5.07 (br. s, 1H), 3.69-3.66 (m, 1H), 3.56-3.45 (m, 3H), 2.25-2.17 (m, 1H), 2.10-2.07 (m, 1H), 1.30 (s, 12H).  $^{13}\text{C}$  NMR Variable Temperature (DMSO- $d_6$ , 101 MHz, 373 K): 159.2, 153.6, 136.7, 135.7, 127.8, 127.1, 126.8,

114.7, 82.9, 75.4, 65.4, 50.9, 43.4, 30.1, 24.1. 1 x C bearing B not observed.  $^{11}\text{B}$  NMR ( $\text{CDCl}_3$ , 128 MHz): 30.9.  $\nu_{\text{max}}$  (neat): 2977, 2866, 1705, 1606, 1415  $\text{cm}^{-1}$ . HRMS: exact mass calculated for  $[\text{M}+\text{H}]^+$  ( $\text{C}_{24}\text{H}_{31}\text{BNO}_5$ ) requires 424.2290  $m/z$ , found 424.2284  $m/z$ .

Preparation of (4*R*)-4-((3*R*,7*S*,10*S*,13*R*)-3,7-dihydroxy-10,13-dimethylhexadecahydro-1*H*-cyclopenta[*a*]phenanthren-17-yl)-*N*-(2-(4-sulfamoylphenoxy)ethyl)pentanamide **11**

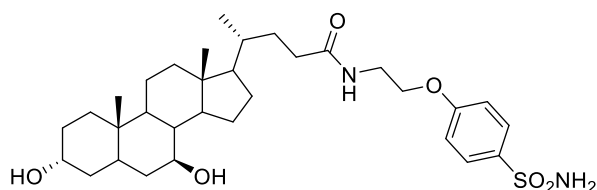

*tert*-butyl (2-(4-sulfamoylphenoxy)ethyl)carbamate **S2** was subjected to Boc deprotection conditions outlined in General Procedure B. Compound **11** was then prepared according to amidation conditions outlined in General Procedure B, using UDCA (106 mg, 0.27 mmol, 1.0 equiv.), DIPEA (237  $\mu\text{L}$ , 1.36 mmol, 4.0 equiv.) and HATU (114 mg, 0.30 mmol, 1.1 equiv) in DMF (2 mL). The crude material was subjected to the purification outlined in General Procedure B (silica gel, 0-10% MeOH in DCM) to afford the desired product **11** as an off-white solid (56 mg, 30% over two steps).  $^1\text{H}$  NMR ( $\text{DMSO-}d_6$ , 500 MHz): 8.04 (t,  $J = 5.6$  Hz, 1H), 7.73 (d,  $J = 8.9$  Hz, 2H), 7.19 (s, 2H), 7.07 (d,  $J = 8.9$  Hz, 2H), 4.42 (d,  $J = 4.6$  Hz, 1H), 4.04 (t,  $J = 5.6$  Hz, 2H), 3.86 (d,  $J = 6.8$  Hz, 1H), 3.41 (q,  $J = 5.5$  Hz, 2H), 3.30-3.24 (m, coincident with solvent peak), 3.17 (d,  $J = 5.3$  Hz, 2H), 2.14-2.09 (m, 1H), 2.03-1.97 (m, 1H), 1.92-1.90 (m, 1H), 1.85-1.79 (m, 1H), 1.77-1.72 (m, 1H), 1.68-1.63 (m, 3H), 1.49-1.43 (m, 3H), 1.38-1.27 (m, 6H), 1.21-1.07 (m, 6H), 1.02-0.91 (m, 2H), 0.88-0.87 (m, 6H), 0.58 (s, 3H).  $^{13}\text{C}$  NMR ( $\text{DMSO-}d_6$ , 126 MHz): 172.9, 160.8, 136.3, 127.7, 114.5, 69.7, 69.5, 66.8, 55.9, 54.7, 43.1, 43.0, 42.2, 38.7, 38.0, 37.7, 37.3, 34.9, 34.8, 33.7, 32.3, 31.6, 30.2, 28.2, 26.7, 23.3, 20.8, 18.4, 12.0. 1 x C not observed.  $\nu_{\text{max}}$  (neat): 3634, 3566, 3396, 3313, 2928, 2863, 1649,

1630  $\text{cm}^{-1}$ . HRMS: exact mass calculated for  $[\text{M}+\text{H}]^+$  ( $\text{C}_{32}\text{H}_{51}\text{N}_2\text{O}_6\text{S}$ ) requires 591.3462  $m/z$ , found 591.3462  $m/z$ .

Preparation of (4*R*)-4-((3*R*,7*S*,10*S*,13*R*)-3,7-dihydroxy-10,13-dimethylhexadecahydro-1*H*-cyclopenta[*a*]phenanthren-17-yl)-*N*-(4-(4-sulfamoylphenoxy)butyl)pentanamide **12**

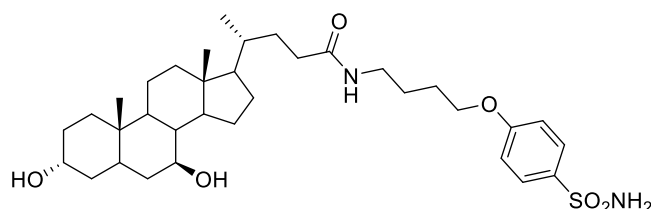

*tert*-butyl (2-(4-sulfamoylphenoxy)ethyl)carbamate **S3** (150 mg, 0.44 mmol, 1.0 equiv.) was subjected to Boc deprotection conditions outlined in General Procedure B. Compound **12** was then prepared according to amidation conditions outlined in General Procedure B, using UDCA (114 mg, 0.22 mmol, 1.0 equiv.), DMF (3 mL), DIPEA (250  $\mu\text{L}$ , 1.46 mmol, 5.0 equiv.) and HATU (122 mg, 0.32 mmol, 1.1 equiv). The crude material was subjected to the purification outlined in General Procedure B (silica gel, 0-10% MeOH in DCM) to afford the desired product **37** as a clear solid (96 mg, 36% over two steps).  $^1\text{H}$  NMR ( $\text{DMSO}-d_6$ , 500 MHz): 7.77 (t,  $J = 5.4$  Hz, 1H), 7.73 (d,  $J = 8.8$  Hz, 2H), 7.18 (s, 2H), 7.06 (d,  $J = 8.8$  Hz, 2H), 4.42 (d,  $J = 4.5$  Hz, 1H), 4.04 (t,  $J = 6.4$  Hz, 2H), 3.85 (d,  $J = 6.8$  Hz, 1H), 3.29-3.25 (m, coincident with solvent peak), 3.10-3.06 (m, 2H), 2.11-2.05 (m, 1H), 1.99-1.92 (m, 2H), 1.87-1.81 (m, 1H), 1.76-1.63 (m, 6H), 1.55-1.44 (m, 5H), 1.41-1.28 (m, 7H), 1.23-1.08 (m, 6H), 1.03-0.96 (m, 1H), 0.89-0.87 (m, 6H), 0.60 (s, 3H).  $^{13}\text{C}$  NMR ( $\text{DMSO}-d_6$ , 101 MHz): 172.4, 161.0, 136.0, 127.6, 114.4, 69.7, 69.4, 67.6, 55.9, 54.9, 43.1, 43.0, 42.1, 38.7, 37.9, 37.7, 37.3, 34.9, 34.8, 33.7, 32.4, 31.7, 30.2, 28.1, 26.7, 26.0, 25.7, 23.3, 20.8, 18.5, 12.0. 1 x C not observed.  $\nu_{\text{max}}$  (neat): 3293, 3078, 2927, 2862, 1644, 1549, 1501, 1452  $\text{cm}^{-1}$ . HRMS: exact mass calculated for  $[\text{M}-\text{H}]^+$  ( $\text{C}_{34}\text{H}_{53}\text{N}_2\text{O}_6\text{S}$ ) requires 617.3630  $m/z$ , found 617.3627  $m/z$ .

Preparation of (4*R*)-4-((3*R*,7*S*,10*S*,13*R*)-3,7-dihydroxy-10,13-dimethylhexadecahydro-1*H*-cyclopenta[*a*]phenanthren-17-yl)-*N*-(2-(3-(4,4,5,5-tetramethyl-1,3,2-dioxaborolan-2-yl)phenoxy)ethyl)pentanamide **13**

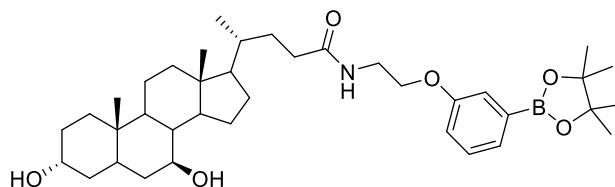

*tert*-Butyl (2-(3-(4,4,5,5-tetramethyl-1,3,2-dioxaborolan-2-yl)phenoxy)ethyl)carbamate **S4** (183 mg, 0.50 mmol, 1.0 equiv.) was subjected to Boc deprotection conditions outlined in General Procedure B. Compound **13** was then prepared according to amidation conditions outlined in General Procedure B, using UDCA (196 mg, 0.50 mmol, 1.0 equiv.), DIPEA (350  $\mu$ L, 2.00 mmol, 4.0 equiv.) and HATU (209 mg, 0.55 mmol, 1.1 equiv) in DMF (5 mL). The crude material was subjected to the purification outlined in General Procedure B (silica gel, 0-4% MeOH in DCM) to afford the desired product **13** as a clear solid (130 mg, 44% over two steps).  $^1\text{H}$  NMR ( $\text{CDCl}_3$ , 500 MHz): 7.41 (d,  $J = 7.2$  Hz, 1H), 7.32-7.27 (m, 2H), 6.99-6.97 (m, 1H), 6.01 (br. s, 1H), 4.06 (t,  $J = 5.0$  Hz, 2H), 3.66-3.63 (m, 2H), 3.59-3.55 (m, 2H), 2.28-2.22 (m, 1H), 2.11-2.05 (m, 1H), 1.98-1.96 (m, 1H), 1.90-1.85 (m, 1H), 1.79-1.77 (m, 5H), 1.67-1.64 (m, 2H), 1.60-1.56 (m, 2H), 1.49-1.38 (m, 6H), 1.33 (s, 12H), 1.27-1.12 (m, 6H), 1.12-0.97 (m, 3H), 0.93-0.91 (m, 6H), 0.64 (s, 3H).  $^{13}\text{C}$  NMR ( $\text{CDCl}_3$ , 126 MHz): 173.8, 158.1, 129.2, 127.8, 119.9, 118.1, 84.0, 71.6, 71.5, 67.0, 55.9, 55.1, 44.0, 43.9, 42.6, 40.3, 39.3, 39.1, 37.5, 37.0, 35.5, 35.1, 34.2, 33.7, 31.9, 30.5, 28.8, 27.0, 25.0, 23.5, 21.3, 18.6, 12.3. 1 x C bearing B not observed.  $^{11}\text{B}$  NMR ( $\text{CDCl}_3$ , 128 MHz): 30.8.  $\nu_{\text{max}}$  (neat): 3330, 2926, 2863, 1651, 1547, 1428  $\text{cm}^{-1}$ . HRMS: exact mass calculated for  $[\text{M}+\text{H}]^+$  ( $\text{C}_{38}\text{H}_{61}\text{BNO}_6$ ) requires 638.4593  $m/z$ , found 638.4580  $m/z$ .

Preparation of (4*R*)-4-((3*R*,7*S*,10*S*,13*R*)-3,7-dihydroxy-10, 13-dimethylhexadecahydro-1*H*-cyclopenta[*a*]phenanthren-17-yl)-*N*-(2-(4-(4,4,5,5-tetramethyl-1,3,2-dioxaborolan-2-yl)phenoxy)ethyl)pentanamide **14**

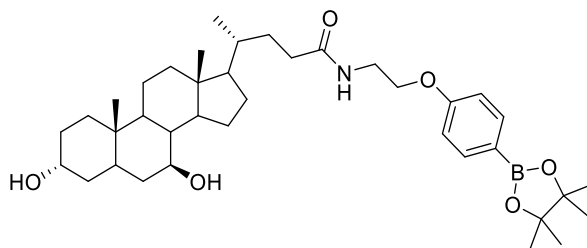

*tert*-Butyl (2-(4-(4,4,5,5-tetramethyl-1,3,2-dioxaborolan-2-yl)phenoxy)ethyl)carbamate **S5** (207 mg, 0.57 mmol, 1.0 equiv.) was subjected to Boc deprotection conditions outlined in General Procedure B. Compound **14** was prepared according to amidation conditions outlined in General Procedure B, using ursodeoxycholic acid (247 mg, 0.63 mmol, 1.0 equiv.), DIPEA (436  $\mu$ L, 2.50 mmol, 4.0 equiv.) and HATU (262 mg, 0.69 mmol, 1.1 equiv) in DMF (5 mL). The crude material was subjected to the purification outlined in General Procedure B (silica gel, 0-3% MeOH in DCM) to afford the desired product **14** as a clear solid (131 mg, 33% over two steps).  $^1\text{H}$  NMR ( $\text{CDCl}_3$ , 500 MHz): 7.74 (d,  $J = 8.2$  Hz, 2H), 6.87 (d,  $J = 8.3$  Hz, 2H), 5.96-5.94 (m, 1H), 4.06-4.04 (m, 2H), 3.68-3.64 (m, 2H), 3.59-3.54 (m, 2H), 2.29-2.23 (m, 1H), 2.12-2.06 (m, 1H), 1.98-1.96 (m, 1H), 1.92-1.84 (m, 1H), 1.82-1.75 (m, 4H), 1.67-1.65 (m, 2H), 1.60-1.56 (m, 2H), 1.49-1.38 (m, 8H), 1.33 (s, 12H), 1.27-1.23 (m, 3H), 1.15-1.00 (m, 4H), 0.93-0.91 (m, 6H), 0.64 (s, 3H).  $^{13}\text{C}$  NMR ( $\text{CDCl}_3$ , 126 MHz): 173.8, 161.2, 136.8, 113.9, 83.8, 71.6, 71.5, 66.9, 55.9, 55.1, 43.9, 42.6, 40.3, 39.3, 39.0, 37.5, 37.0, 35.5, 35.1, 34.2, 33.7, 31.9, 30.5, 28.8, 27.0, 25.0, 23.5, 21.3, 18.6, 12.3. 1 x C bearing B not observed.  $^{11}\text{B}$  NMR ( $\text{CDCl}_3$ , 128 MHz): 31.2.  $\nu_{\text{max}}$  (neat): 3421, 2928, 2861, 1651, 1604, 1547, 1454  $\text{cm}^{-1}$ . HRMS: exact mass calculated for  $[\text{M}+\text{H}]^+$  ( $\text{C}_{38}\text{H}_{61}\text{BNO}_6$ ) requires 638.4593  $m/z$ , found 638.4582  $m/z$ .



Preparation of (4*R*)-4-((3*R*,7*S*,10*S*,13*R*)-3,7-dihydroxy-10,13-dimethylhexadecahydro-1*H*-cyclopenta[*a*]phenanthren-17-yl)-*N*-(3-(4-(4,4,5,5-tetramethyl-1,3,2-dioxaborolan-2-yl)phenoxy)propyl)pentanamide **15**

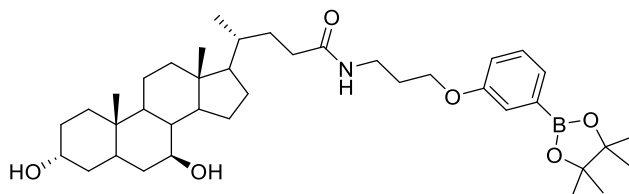

*tert*-Butyl (3-(3-(4,4,5,5-tetramethyl-1,3,2-dioxaborolan-2-yl)phenoxy)propyl)carbamate **S6** (300 mg, 0.80 mmol, 1.0 equiv.) was subjected to Boc deprotection conditions outlined in General Procedure B. Compound **15** was prepared according to amidation conditions outlined in General Procedure B, using UDCA (345 mg, 0.88 mmol, 1.0 equiv.), DIPEA (614  $\mu$ L, 3.52 mmol, 4.0 equiv.) and HATU (368 mg, 0.97 mmol, 1.1 equiv) in DMF (4 mL). The crude material was subjected to the purification outlined in General Procedure B (silica gel, 0-4% MeOH in DCM) to afford the desired product **15** as a clear solid (190 mg, 33% over two steps).  $^1\text{H}$  NMR ( $\text{CDCl}_3$ , 500 MHz): 7.42 (d,  $J = 7.2$  Hz, 1H), 7.32-7.28 (m, 2H), 6.99 (dd,  $J = 8.1$ , 2.4 Hz, 1H), 5.84 (br. s, 1H), 4.08 (t,  $J = 5.6$  Hz, 2H), 3.61-3.56 (m, 2H), 3.48-3.45 (m, 2H), 2.27-2.21 (m, 1H), 2.09-1.97 (m, 4H), 1.93-1.85 (m, 1H), 1.82-1.76 (m, 4H), 1.68-1.66 (m, 2H), 1.61-1.57 (m, 2H), 1.51-1.40 (m, 7H), 1.34 (s, 12H), 1.30-1.20 (m, 5H), 1.18-1.01 (m, 4H), 0.94-0.93 (m, 6H), 0.67 (s, 3H).  $^{13}\text{C}$  NMR ( $\text{CDCl}_3$ , 126 MHz): 173.6, 158.1, 129.1, 127.5, 119.60, 118.2, 83.9, 71.5, 71.4, 66.5, 55.7, 54.9, 43.8, 43.8, 42.5, 40.2, 39.2, 37.6, 37.3, 36.8, 35.4, 35.0, 34.1, 33.7, 31.9, 30.4, 28.9, 28.7, 26.9, 24.9, 23.4, 21.2, 18.5, 12.2. 1 x C bearing B not observed.  $^{11}\text{B}$  NMR ( $\text{CDCl}_3$ , 160 MHz): 31.0.  $\nu_{\text{max}}$  (neat): 3811, 2928, 2863, 1573, 1548, 1649, 1428  $\text{cm}^{-1}$ . HRMS: exact mass calculated for  $[\text{M}+\text{H}]^+$  ( $\text{C}_{39}\text{H}_{63}\text{BNO}_6$ ) requires 652.4750  $m/z$ , found 652.4737  $m/z$ .

Preparation of (4*R*)-4-((3*R*,7*S*,10*S*,13*R*)-3,7-dihydroxy-10,13-dimethylhexadecahydro-1*H*-cyclopenta[*a*]phenanthren-17-yl)-*N*-(3-(4-(4,4,5,5-tetramethyl-1,3,2-dioxaborolan-2-yl)phenoxy)propyl)pentanamide **16**

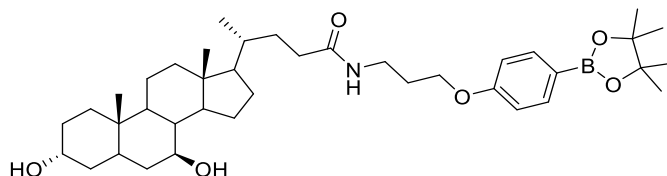

*tert*-Butyl (3-(4-(4,4,5,5-tetramethyl-1,3,2-dioxaborolan-2-yl)phenoxy)propyl)carbamate **S7** (231 mg, 0.61 mmol, 1.0 equiv.) was subjected to Boc deprotection conditions outlined in General Procedure B. Compound **16** was prepared according to amidation conditions outlined in General Procedure B, using ursodeoxycholic acid (239 mg, 0.61 mmol, 1.0 equiv.), DIPEA (424  $\mu$ L, 2.43 mmol, 4.0 equiv.) and HATU (254 mg, 0.67 mmol, 1.1 equiv.) in DMF (3 mL). The crude material was subjected to the purification outlined in General Procedure B (silica gel, 0-3% MeOH in DCM) to afford the desired product **16** as a clear solid (247 mg, 60% over two steps).  $^1\text{H}$  NMR ( $\text{CDCl}_3$ , 500 MHz): 7.75 (d,  $J = 8.3$  Hz, 2H), 6.88 (d,  $J = 8.4$  Hz, 2H), 5.81 (t,  $J = 5.3$  Hz, 1H), 4.07 (t,  $J = 5.8$  Hz, 2H), 3.63-3.54 (m, 2H), 3.45 (app. q,  $J = 6.2$  Hz, 2H), 2.20-2.26 (m, 1H), 1.98-2.09 (m, 4H), 1.85-1.92 (m, 1H), 1.76-1.82 (m, 5H), 1.66-1.68 (m, 2H), 1.57-1.68 (m, 2H), 1.57-1.61 (m, 3H), 1.40-1.51 (m, 9H), 1.33 (s, 12 H), 0.99-1.17 (m, 4H), 0.94 (s, 3H), 0.92-0.93 (m, 3H), 0.67 (s, 3H).  $^{13}\text{C}$  NMR ( $\text{CDCl}_3$ , 101 MHz): 173.7, 161.3, 136.8, 113.9, 83.8, 71.6, 71.5, 66.3, 55.9, 55.1, 43.9, 43.9, 42.6, 40.3, 39.3, 37.5, 37.5, 37.0, 35.5, 35.1, 34.2, 33.8, 32.0, 30.5, 29.1, 28.8, 27.0, 25.0, 23.5, 21.3, 18.7, 12.3. 1 x C bearing B not observed.  $^{11}\text{B}$  NMR ( $\text{CDCl}_3$ , 160 MHz): 31.7.  $\nu_{\text{max}}$  (neat): 3324, 2926, 2863, 1651, 1604, 1547, 1450  $\text{cm}^{-1}$ . HRMS: exact mass calculated for  $[\text{M}+\text{H}]^+$  ( $\text{C}_{39}\text{H}_{63}\text{BNO}_6$ ) requires 652.4755  $m/z$ , found 652.4756  $m/z$ .

Preparation of potassium (4-(3-((4*R*)-4-((3*R*,7*S*,10*S*,13*R*)-3,7-dihydroxy-10,13-dimethylhexadecahydro-1*H*-cyclopenta[*a*]phenanthren-17-yl)pentanamido)propoxy)phenyl)trifluoroborate **17**

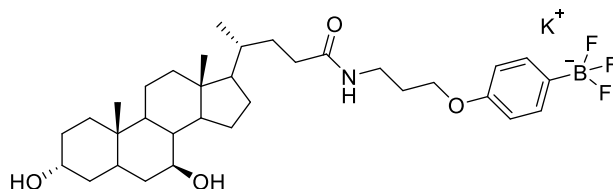

Procedure adapted from Lennox and Lloyd-Jones.<sup>2</sup> To a round-bottomed flask was added *tert*-Butyl (3-(4-(4,4,5,5-tetramethyl-1,3,2-dioxaborolan-2-yl)phenoxy)propyl)carbamate **16** (146 mg, 0.21 mmol, 1.0 equiv.) and MeOH (1 mL) followed by MeCN (1 mL). Potassium fluoride (52 mg, 0.89 mmol, 4.0 equiv) in H<sub>2</sub>O (500  $\mu$ L) was then added and the reaction mixture was stirred until complete dissolution of the boronic ester. *L*-(+)-tartaric acid (69 mg, 0.46 mmol, 2.05 equiv) was dissolved in THF (1 mL) and added dropwise to the rapidly ( $\approx$  1000 RPM) stirring biphasic mixture over a period of 5 minutes, as a white precipitate formed. The reaction was stirred for 2 minutes, diluted with MeCN (3 mL) and stirred for a further 2 minutes before being diluted again with MeCN (1 mL) and filtered. The flask and filter were rinsed with further portions of acetonitrile (3 x 5 mL) and the combined filtrates were concentrated *in vacuo* to provide a mixture of the corresponding potassium organotrifluoroborate salt and pinacol. The filter cake was then washed with Et<sub>2</sub>O (3 x 5 mL) to remove the excess pinacol leaving behind the product **17** as a white solid which was telescoped through to the next step as the trifluoroborate salt without further purification. <sup>1</sup>H NMR (DMSO-*d*<sub>6</sub>, 500 MHz): 7.82 (t, *J* = 5.3 Hz, 1H), 7.20 (d, *J* = 8.1 Hz, 2H), 6.64 (d, *J* = 8.1 Hz, 2H), 4.45-4.37 (m, 1H), 3.89-3.84 (m, 3H), 3.17-3.14 (m, 2H), 2.11-2.05 (m, 1H), 1.99-1.92 (m, 2H), 1.87-1.73 (m, 4H), 1.71-1.63 (m, 3H), 1.51-1.46 (m, 3H), 1.41-1.27 (m, 8H), 1.21-1.07 (m, 7H), 1.03-0.91 (m, 2H), 0.89-0.87 (m, 6H), 0.61 (s, 3H). <sup>13</sup>C NMR (DMSO-*d*<sub>6</sub>, 126 MHz): 172.5, 156.4, 132.2, 112.5,

69.7, 69.5, 64.7, 55.9, 54.7, 43.1, 43.0, 42.2, 38.7, 37.7, 37.3, 35.5, 34.9, 34.8, 33.8, 32.4, 31.7, 30.2, 29.1, 28.2, 26.7, 23.3, 20.8, 18.5, 12.0. 1 x C bearing B not observed, 1 x C not observed.  $^{11}\text{B}$  NMR (DMSO- $d_6$ , 160 MHz): 3.63.  $^{19}\text{F}$  NMR (DMSO- $d_6$ , 471 MHz): -138.3.  $\nu_{\text{max}}$  (neat): 3364, 2930, 2865, 1646, 1605  $\text{cm}^{-1}$ . HRMS: exact mass calculated for  $[\text{M-K}]^-$  ( $\text{C}_{33}\text{H}_{50}\text{BF}_3\text{NO}_4$ ) requires 592.3796  $m/z$ , found 592.3796  $m/z$ .

Preparation of (4-(3-((4*R*)-4-((3*R*,7*S*,10*S*,13*R*)-3,7-dihydroxy-10,13-dimethylhexadecahydro-1*H*-cyclopenta[*a*]phenanthren-17-yl)pentanamido)propoxy)phenyl)boronic acid **18**

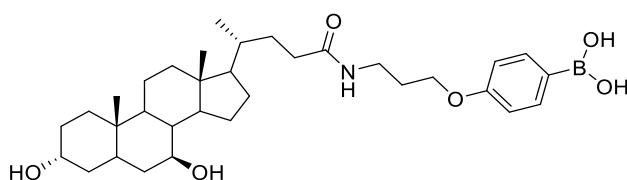

To a round-bottomed flask containing **17** (60 mg, 0.10 mmol, 1.0 equiv.) and excess  $\text{SiO}_2$  under argon was added  $\text{H}_2\text{O}$  (3 mL). The reaction mixture was stirred at rt for 1 h before being then filtered, and the filter cake was thoroughly washed with EtOAc. The organic phases were separated, and the aqueous phase was extracted with EtOAc (2x 10 mL). The combined organic phases were combined, washed with brine (10 mL), dried over  $\text{MgSO}_4$ , and concentrated *in vacuo* to afford title compound **18** as a white solid (32.1 mg, 43 %).  $^1\text{H}$  NMR (DMSO- $d_6$ , 400 MHz): 7.85-7.81 (m, 2H), 7.73-7.69 (m, 2H), 6.88-6.86 (m, 2H), 4.44-4.43 (m, 1H), 4.03-3.95 (m, 2H), 3.86-3.85 (m, 1H), 3.23-3.14 (m, 2H), 2.12-2.04 (m, 1H), 2.01-1.91 (m, 2H), 1.88-1.80 (m, 3H), 1.78-1.62 (m, 4H), 1.52-1.42 (m, 3H), 1.39-1.27 (m, 6H), 1.19-1.06 (m, 6H), 1.05-0.88 (m, 9H), 0.61 (s, 3H).  $^{13}\text{C}$  NMR (DMSO- $d_6$ , 101 MHz): 172.6, 160.3, 135.8, 113.4, 69.7, 69.5, 64.9, 55.9, 54.7, 43.1, 43.0, 42.2, 38.7, 37.7, 37.3, 35.4, 34.9, 34.8, 33.7, 32.4, 31.7, 30.2, 28.9, 28.2, 26.7, 23.3, 20.8, 18.5, 12.0. 1 x C bearing B not observed, 1 x C not observed.  $^{11}\text{B}$  NMR (MeOD, 160 MHz): 28.4.  $\nu_{\text{max}}$  (neat): 3322, 2924, 2854, 1651, 1602, 1513, 1454,

1411  $\text{cm}^{-1}$ . HRMS: exact mass calculated for  $[\text{M}+\text{H}]^+$  ( $\text{C}_{33}\text{H}_{53}\text{BNO}_6$ ) requires 570.3966  $m/z$ , found 570.3959  $m/z$ .

Preparation of (4*R*)-4-((3*R*,7*S*,10*S*,13*R*)-3,7-dihydroxy-10,13-dimethylhexadecahydro-1*H*-cyclopenta[*a*]phenanthren-17-yl)-1-((*R*)-3-(4-(4,4,5,5-tetramethyl-1,3,2-dioxaborolan-2-yl)phenoxy)pyrrolidin-1-yl)pentan-1-one **20**

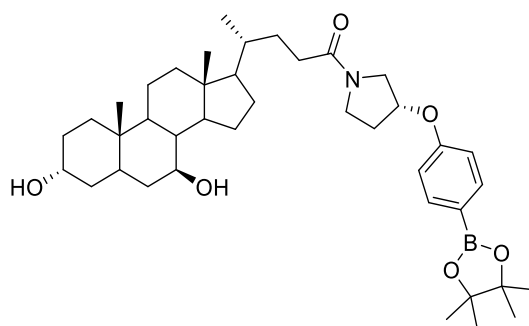

Benzyl (4*R*)-4-((3*R*,7*S*,10*S*,13*R*)-3,7-dihydroxy-10,13-dimethylhexadecahydro-1*H*-cyclopenta[*a*]phenanthren-17-yl)-1-((*R*)-3-(4-(4,4,5,5-tetramethyl-1,3,2-dioxaborolan-2-yl)phenoxy)pyrrolidine-1-carboxylate **S9** (269 mg, 0.63 mmol, 1.0 equiv.) was subjected to Cbz deprotection conditions in accordance with General Procedure B to generate intermediate **S9a**. Compound **20** was prepared according to amidation conditions outlined in General Procedure B using UDCA (302 mg, 0.77 mmol, 1.0 equiv.), **S9a** (231 mg, 0.77 mmol, 1.0 equiv.), DMF (5 mL), DIPEA (405  $\mu\text{L}$ , 2.32 mmol, 3.0 equiv.) and HATU (323 mg, 0.85 mmol, 1.1 equiv.). The crude material was subjected to the purification outlined in General Procedure B (silica gel, 0-6% MeOH in DCM) to afford the desired product **20** as a white solid (151 mg, 30%).  $^1\text{H}$  NMR ( $\text{CDCl}_3$ , 500 MHz): 7.76-7.72 (m, 2H), 6.87-6.84 (m, 2H), 5.03-4.95 (m, 1H), 3.82-3.56 (m, 6H), 2.37-2.19 (m, 3H), 2.16-2.07 (m, 1H), 2.01-1.90 (m, 2H), 1.83-1.76 (m, 5H), 1.68-1.54 (m, 6H), 1.50-1.41 (m, 7H), 1.33 (s, 12H), 1.25-1.15 (m, 4H), 1.10-1.01 (m, 2H), 0.94-0.91 (m, 6H), 0.68-0.67 (m, 3H). Rotameric mixture observed.  $^{13}\text{C}$  NMR ( $\text{CDCl}_3$ , 126 MHz): 172.6, 172.5, 159.7, 159.6, 136.82, 136.77, 114.94, 114.87, 83.82, 83.76, 76.3, 74.8, 71.6, 71.51, 71.48, 55.9, 55.8, 55.2, 55.1, 52.2, 51.6, 44.8, 43.9, 43.9, 42.6, 40.30, 40.27, 39.3, 37.5, 37.0, 35.6, 35.1, 34.2,

32.0, 31.8, 31.7, 31.1, 31.0, 30.5, 30.2, 28.8, 27.1, 25.0, 23.5, 21.3, 18.80, 18.75, 12.3. 1 x C bearing B not observed. Rotameric mixture observed.  $^{11}\text{B}$  NMR ( $\text{CDCl}_3$ , 128 MHz): 31.1.  $\nu_{\text{max}}$  (neat): 3407, 2930, 2867, 1629, 1606  $\text{cm}^{-1}$ . HRMS: exact mass calculated for  $[\text{M}+\text{H}]^+$  ( $\text{C}_{40}\text{H}_{62}\text{BNO}_6\text{Na}$ ) requires 686.4569  $m/z$ , found 686.4558  $m/z$ .

Preparation of (4*R*)-4-((3*R*,7*S*,10*S*,13*R*)-3,7-dihydroxy-10,13-dimethylhexadecahydro-1*H*-cyclopenta[*a*]phenanthren-17-yl)-1-((*S*)-3-(4-(4,4,5,5-tetramethyl-1,3,2-dioxaborolan-2-yl)phenoxy)pyrrolidin-1-yl)pentan-1-one **21**

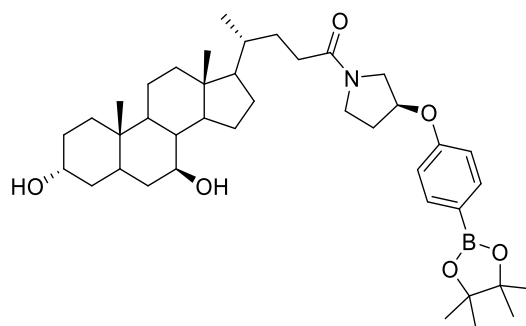

(*S*)-benzyl 3-(4-(4, 4, 5, 5-tetramethyl-1, 3, 2-dioxaborolan-2-yl)phenoxy)pyrrolidine-1-carboxylate **S10** (269 mg, 0.63 mmol, 1.0 equiv.) was subjected to Cbz deprotection conditions as outlined in General Procedure B to generate crude intermediate **S10a**. Compound **21** was prepared according to amidation conditions outlined in General Procedure B, using UDCA (255 mg, 0.65 mmol, 1.0 equiv.), **S10a** (194 mg, 0.65 mmol, 1.0 equiv), DMF (5 mL), DIPEA (340  $\mu\text{L}$ , 1.95 mmol, 3.0 equiv.) and HATU (273 mg, 0.72 mmol, 1.1 equiv). The crude material was subjected to the purification outlined in General Procedure B (silica gel, 0-6% MeOH in DCM) to afford the desired product **21** as a white solid (194 mg, 46 %).  $^1\text{H}$  NMR ( $\text{CDCl}_3$ , 500 MHz): 7.77-7.73 (m, 2H), 6.87-6.84 (m, 2H), 5.03-4.95 (m, 1H), 3.83-3.56 (m, 6H), 2.37-2.07 (m, 4H), 2.02-1.97 (m, 2H), 1.83-1.76 (m, 4H), 1.68-1.57 (m, 5H), 1.51-1.40 (m, 9H), 1.33 (s, 12H), 1.28-1.20 (m, 4H), 0.96-0.91 (m, 6H), 0.68-0.66 (m, 3H). Rotameric mixture observed.  $^{13}\text{C}$  NMR ( $\text{CDCl}_3$ , 126 MHz): 172.6, 172.5, 159.7, 159.6, 136.83, 136.78,

114.94, 114.88, 83.83, 83.77, 76.3, 74.8, 71.6, 71.5, 55.9, 55.2, 52.3, 51.6, 44.8, 44.0, 43.94, 43.86, 42.6, 40.3, 39.3, 37.5, 36.9, 35.6, 35.5, 35.1, 34.2, 32.0, 31.9, 31.7, 31.01, 30.99, 30.5, 30.2, 28.81, 28.77, 27.1, 25.0, 23.5, 21.3, 18.8, 12.3. 1 x C bearing B not observed. Rotameric mixture observed.  $^{11}\text{B}$  NMR ( $\text{CDCl}_3$ , 160 Hz): 31.1.  $\nu_{\text{max}}$  (neat): 3418, 2930, 2867, 1606  $\text{cm}^{-1}$ . HRMS: exact mass calculated for  $[\text{M}+\text{H}]^+$  ( $\text{C}_{40}\text{H}_{62}\text{BNO}_6\text{Na}$ ) requires 686.4569  $m/z$ , found 686.4562  $m/z$ .

## 4. <sup>1</sup>H NMR, <sup>13</sup>C NMR, <sup>11</sup>B NMR, <sup>19</sup>F NMR and HRMS Spectra

### Spectra for intermediate S1

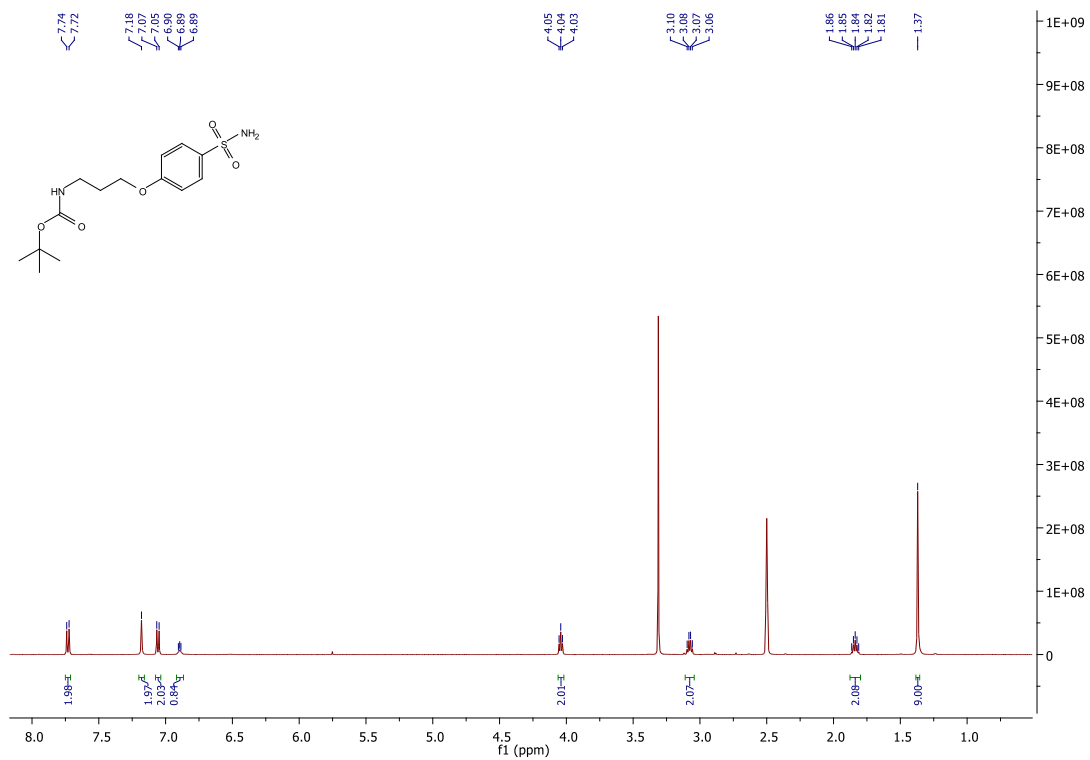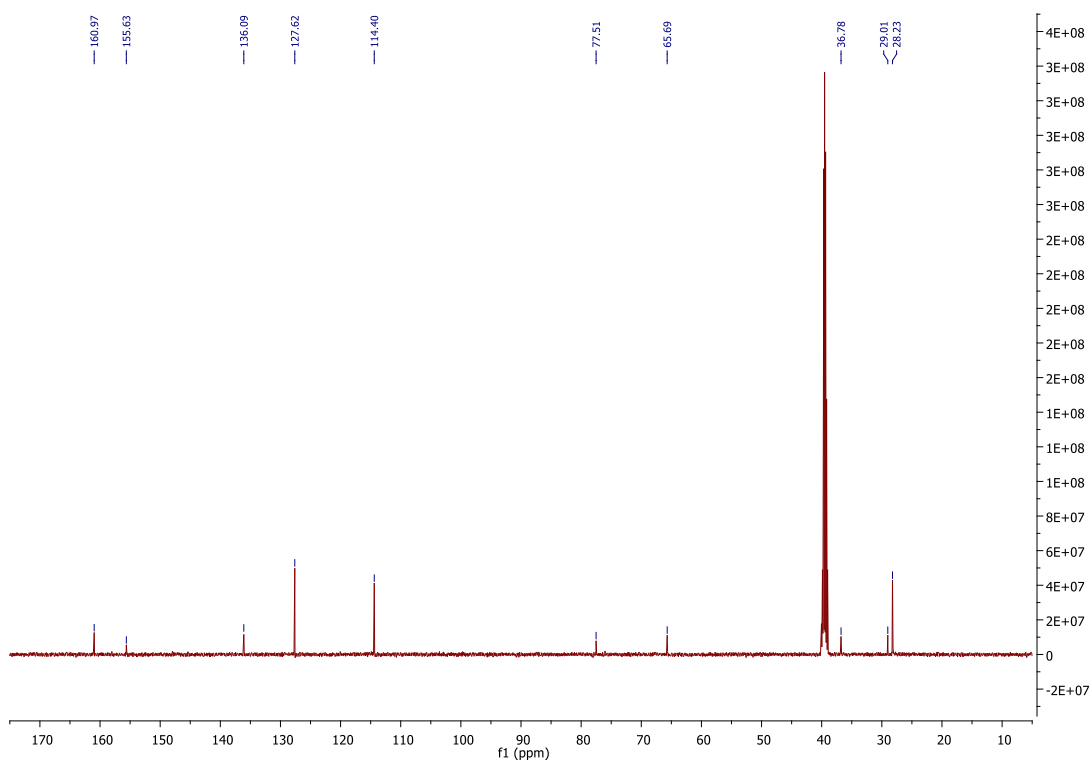



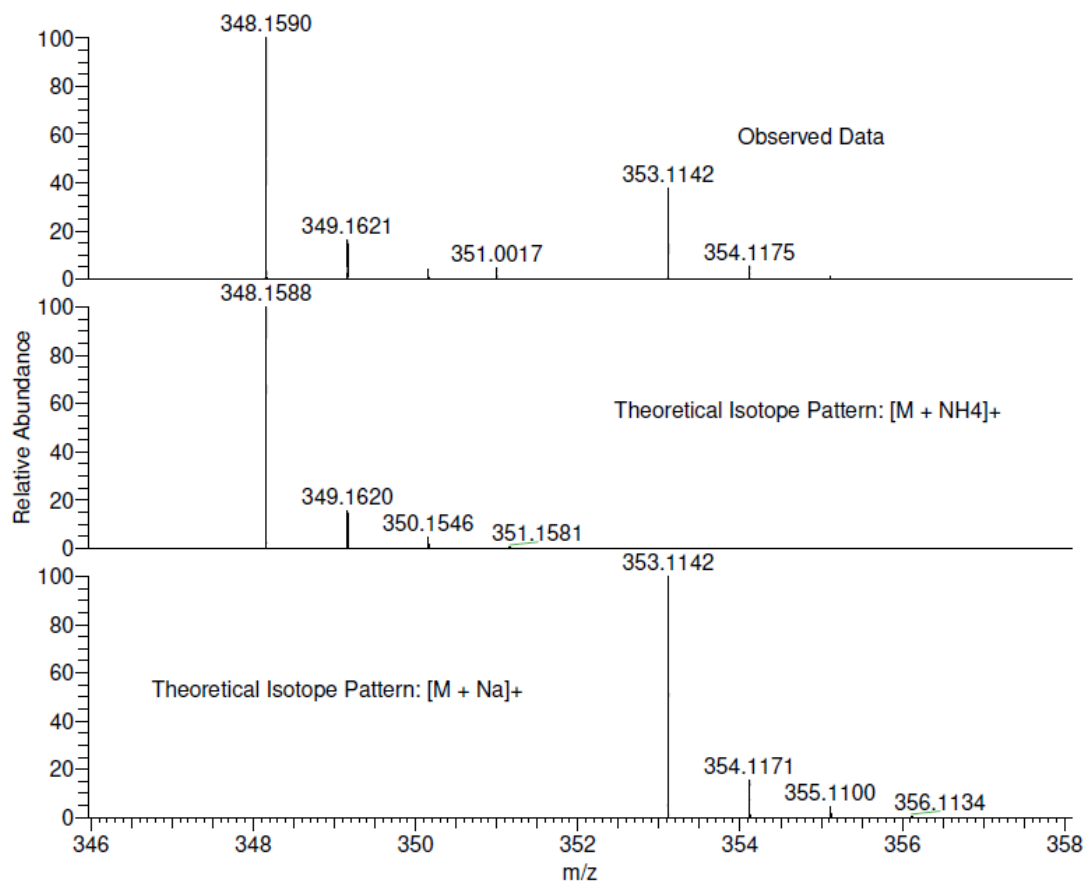

### Spectra for intermediate S2

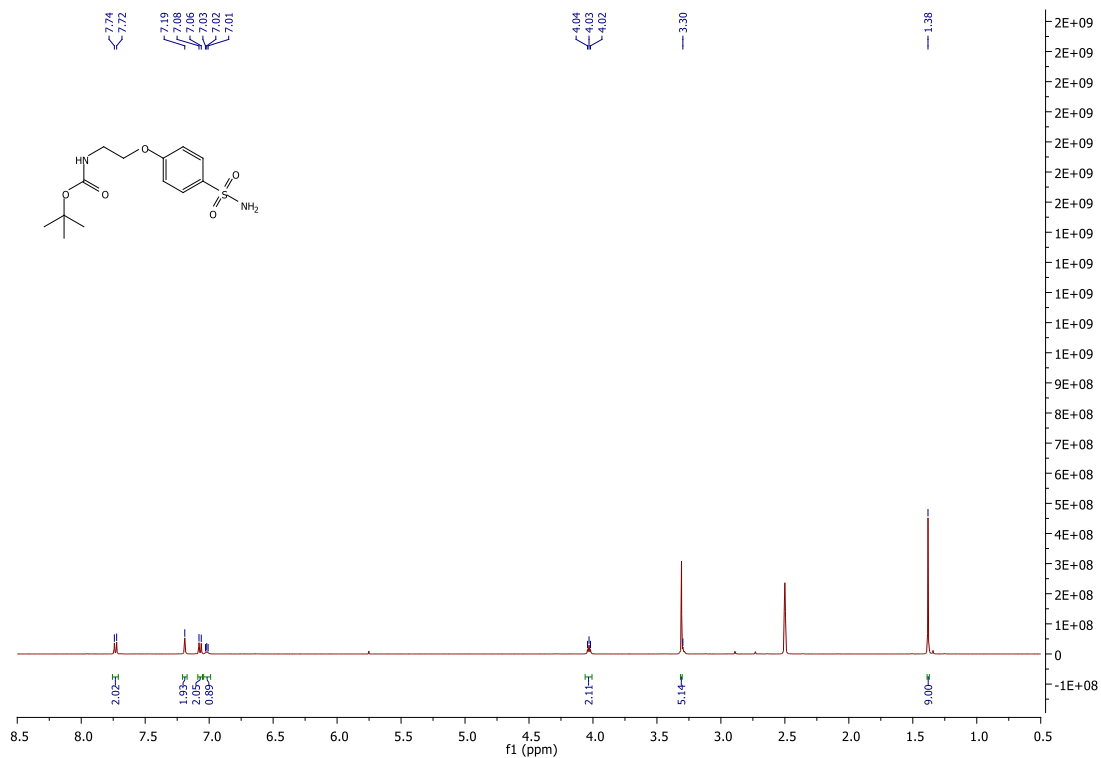

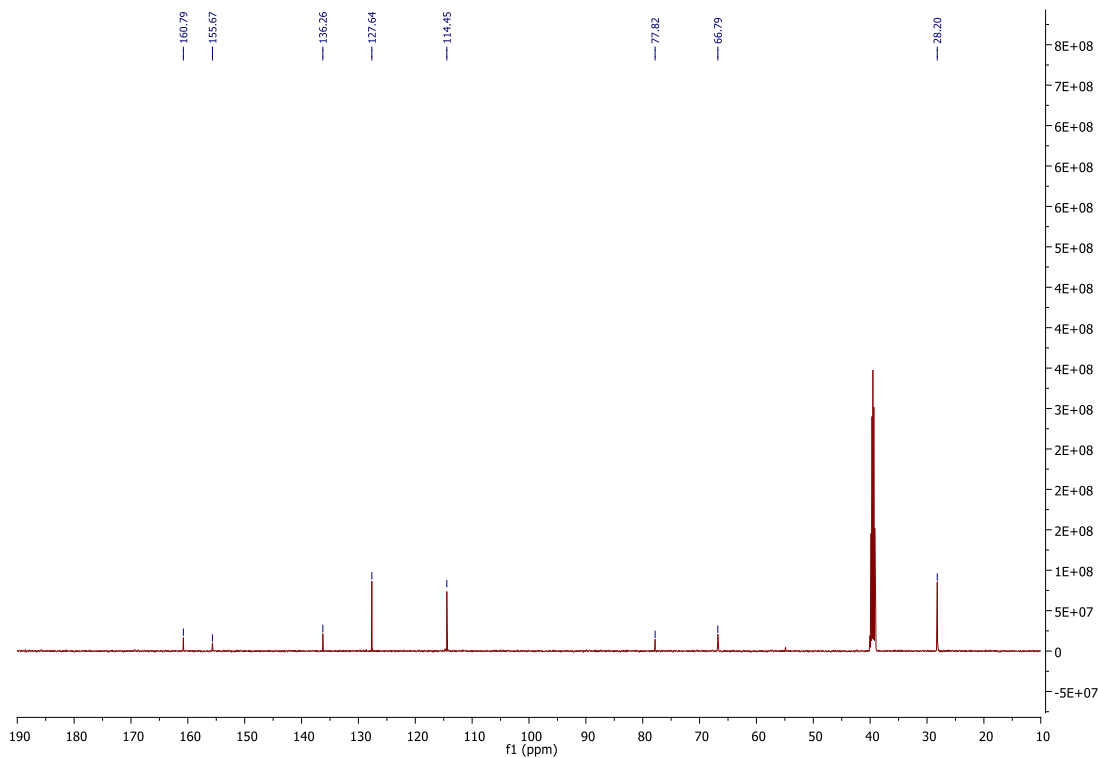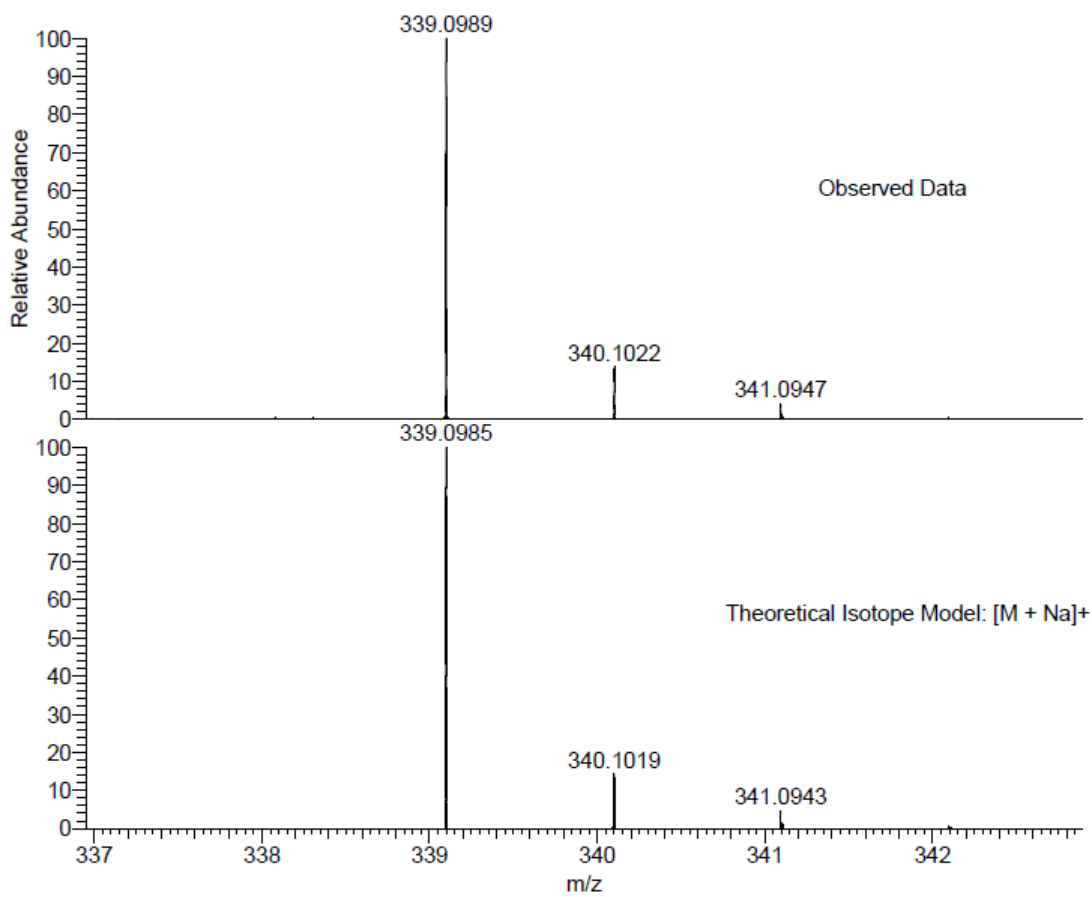

# Spectra for intermediate S3

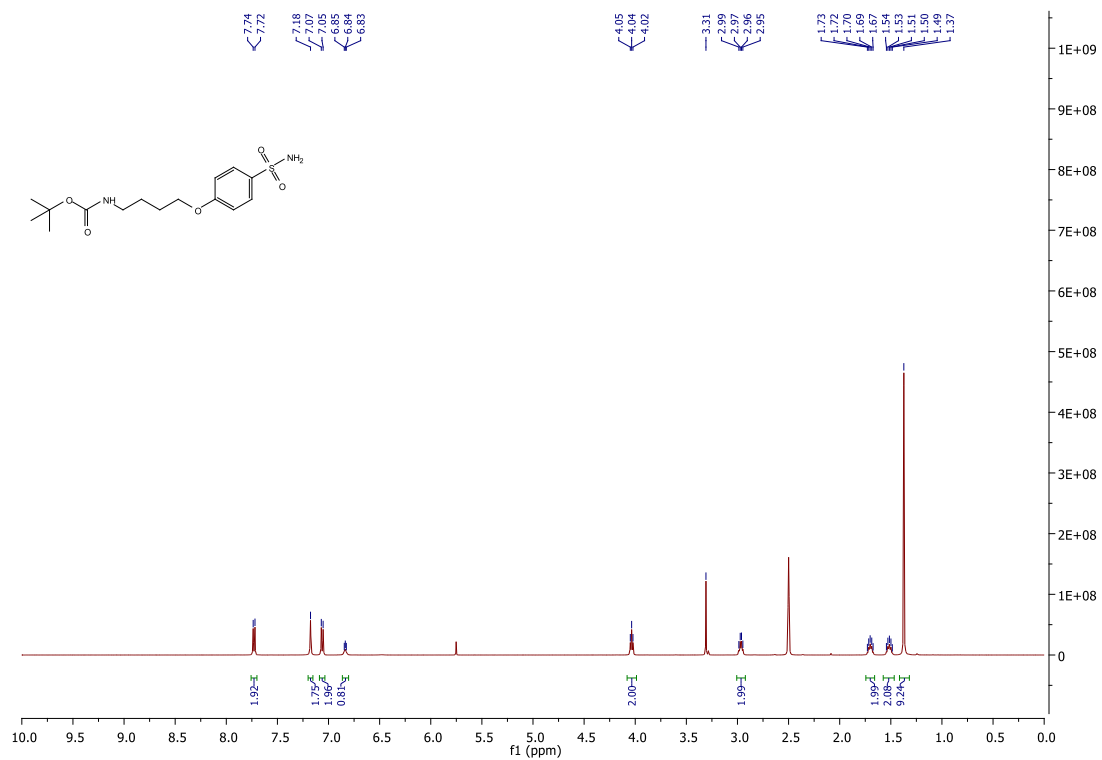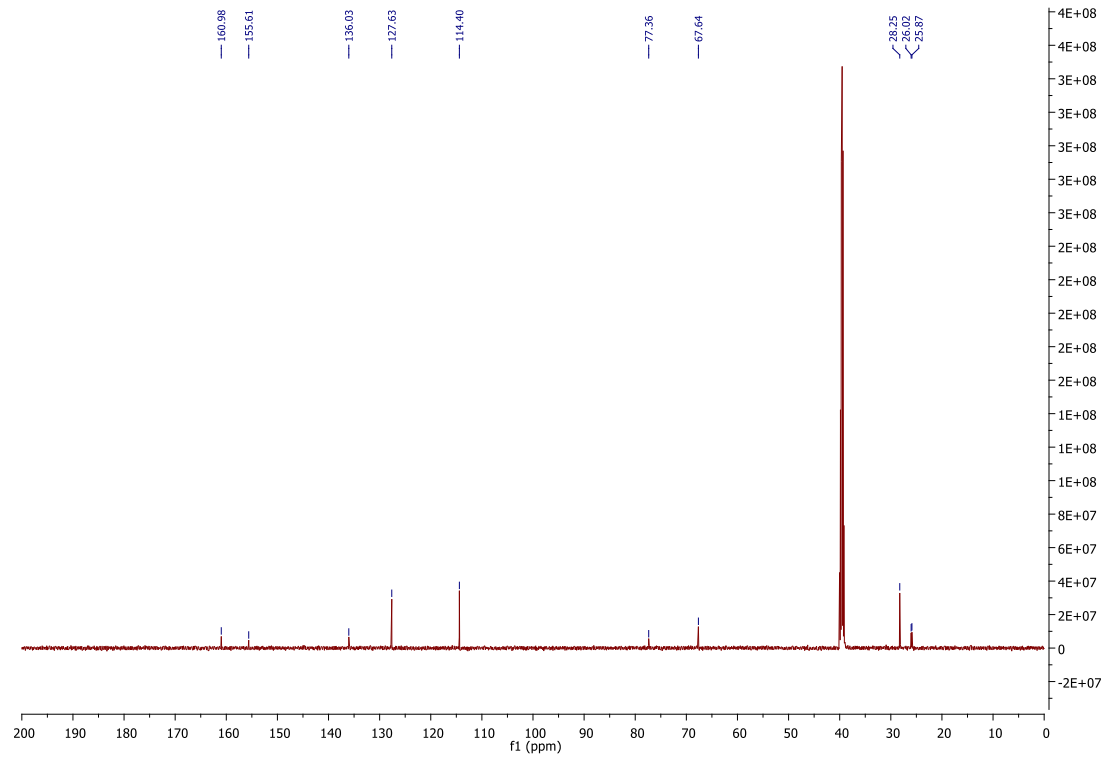

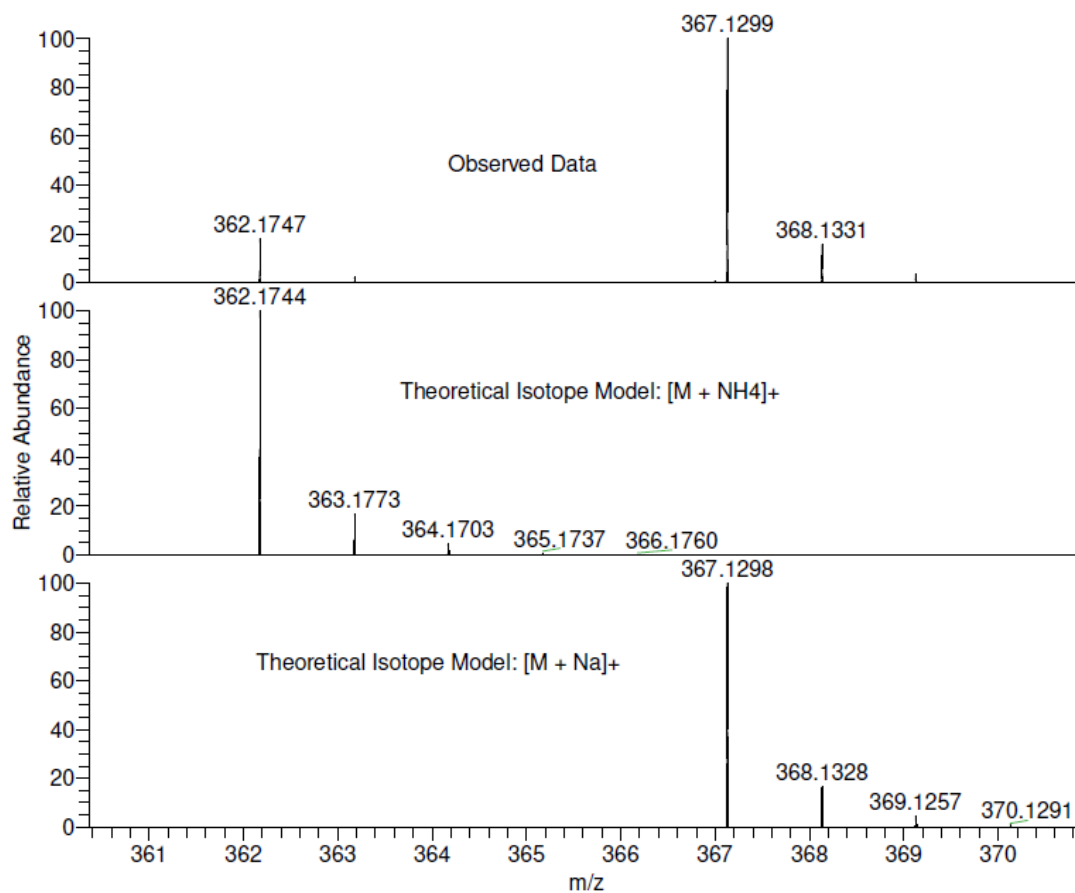

**Spectra for intermediate S4**

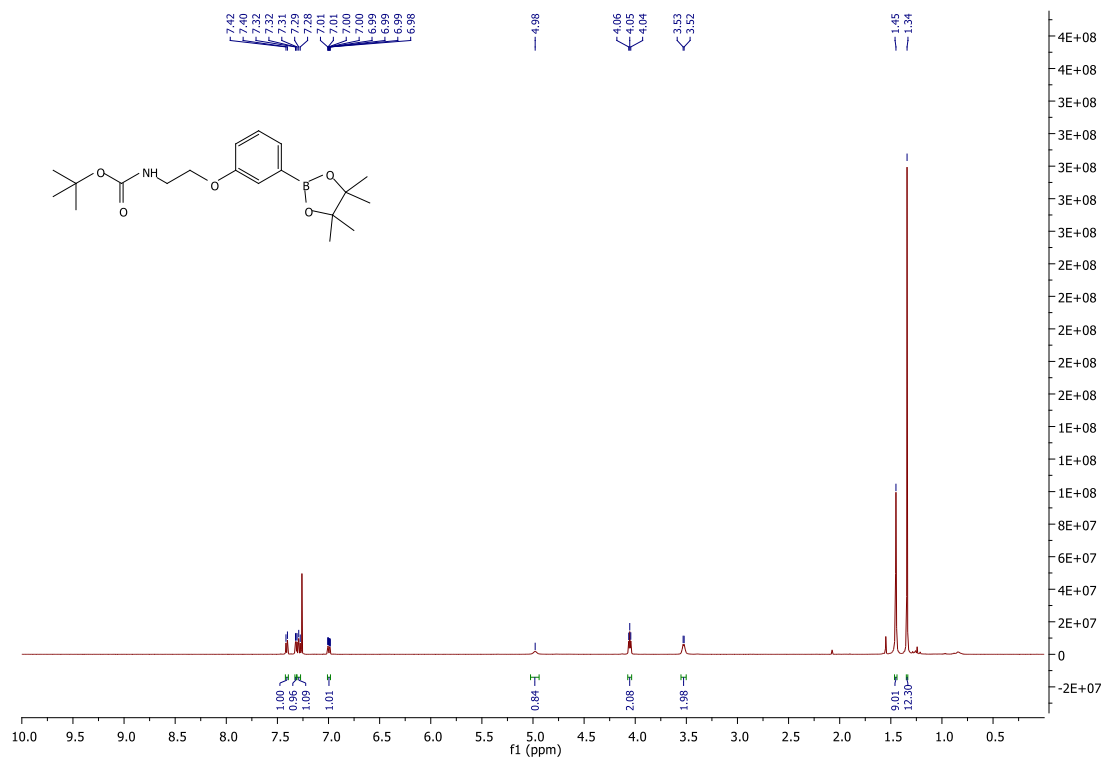

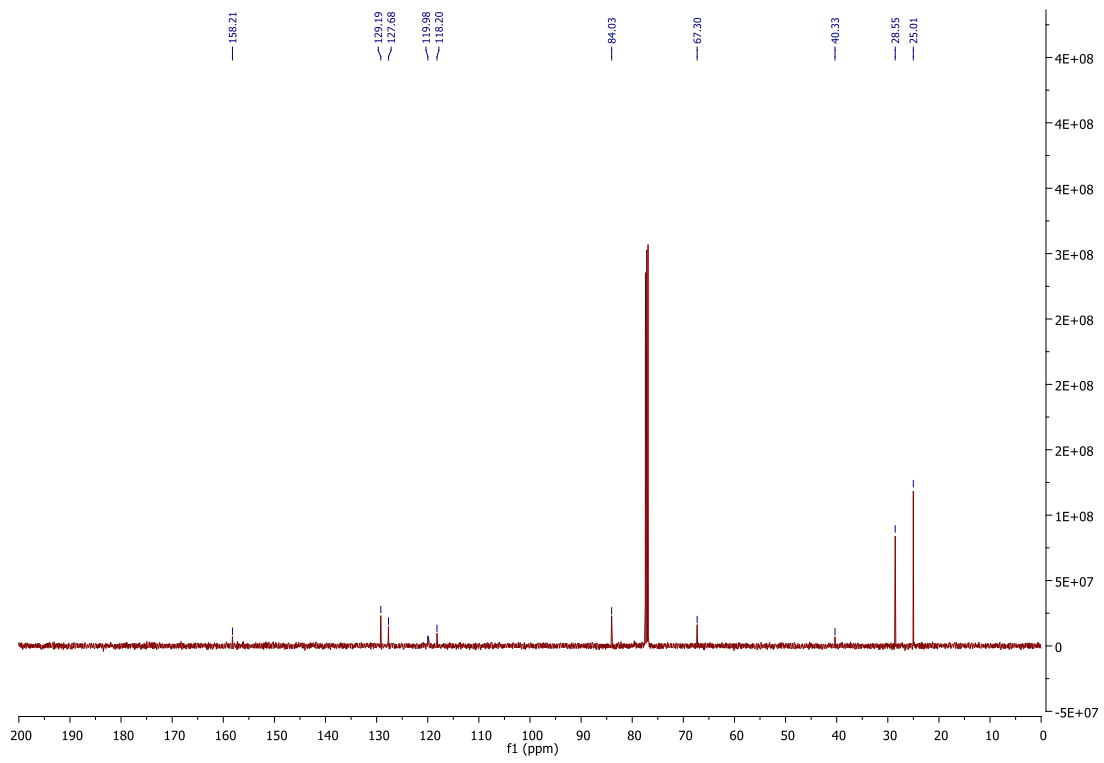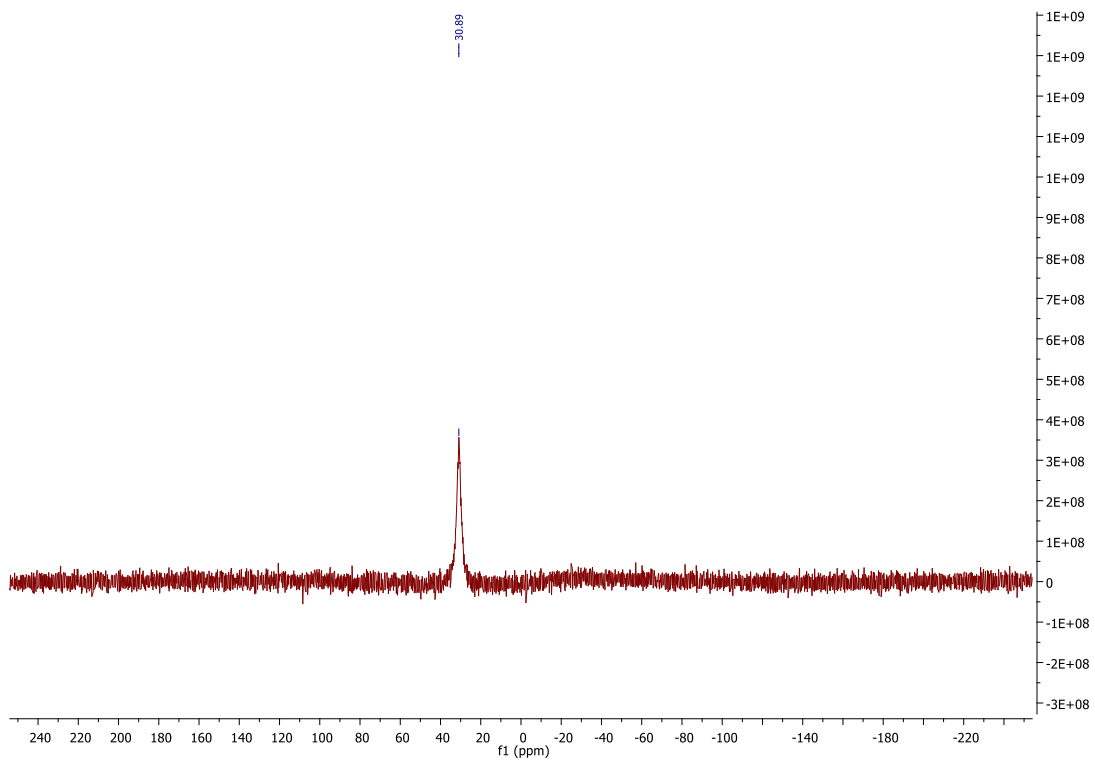

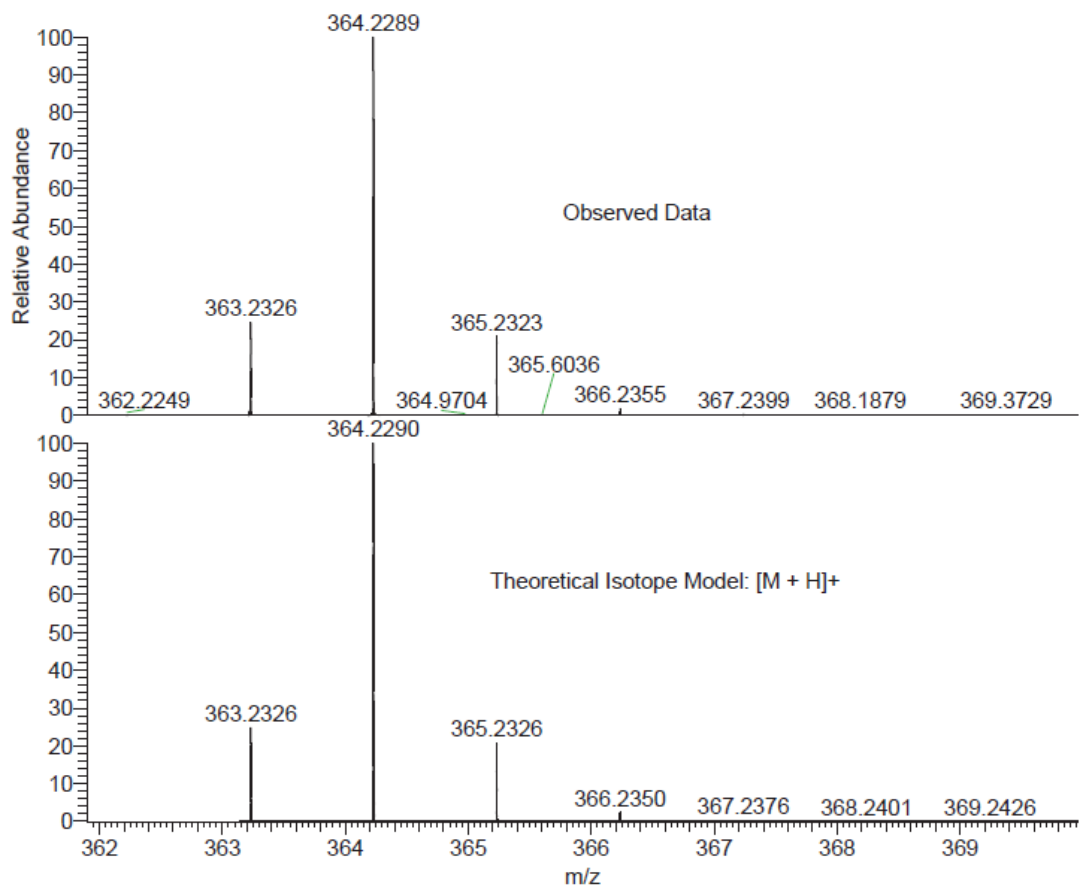

Spectra for intermediate S5

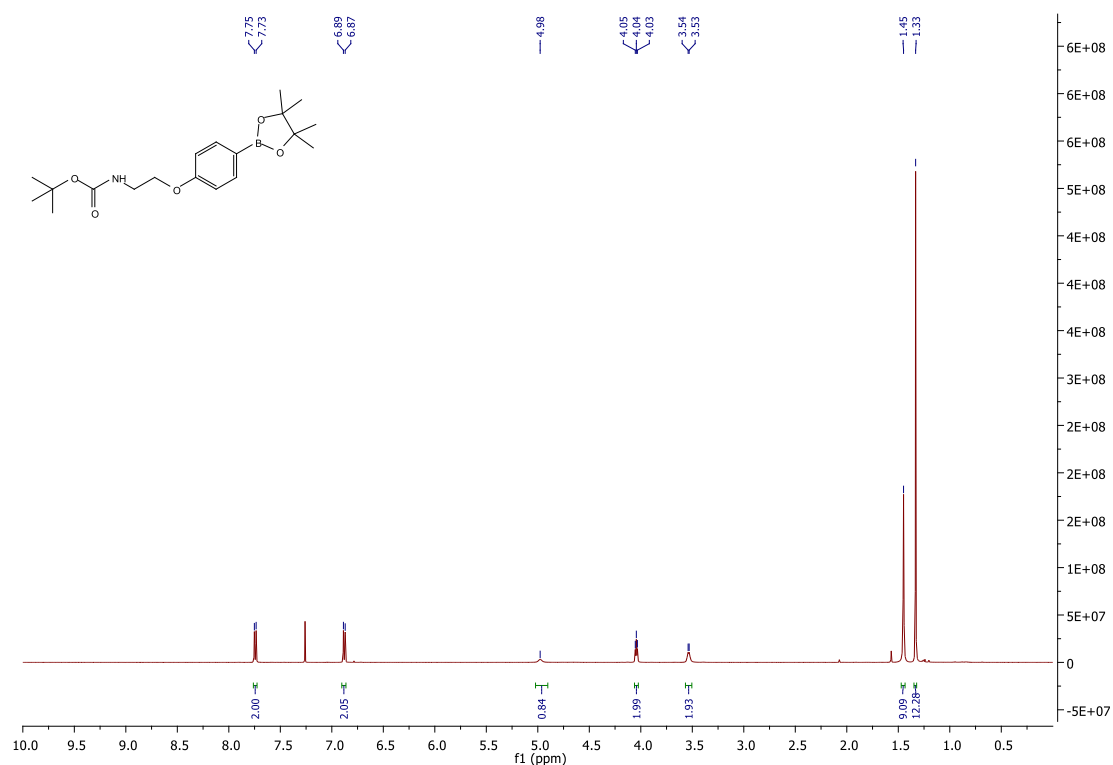

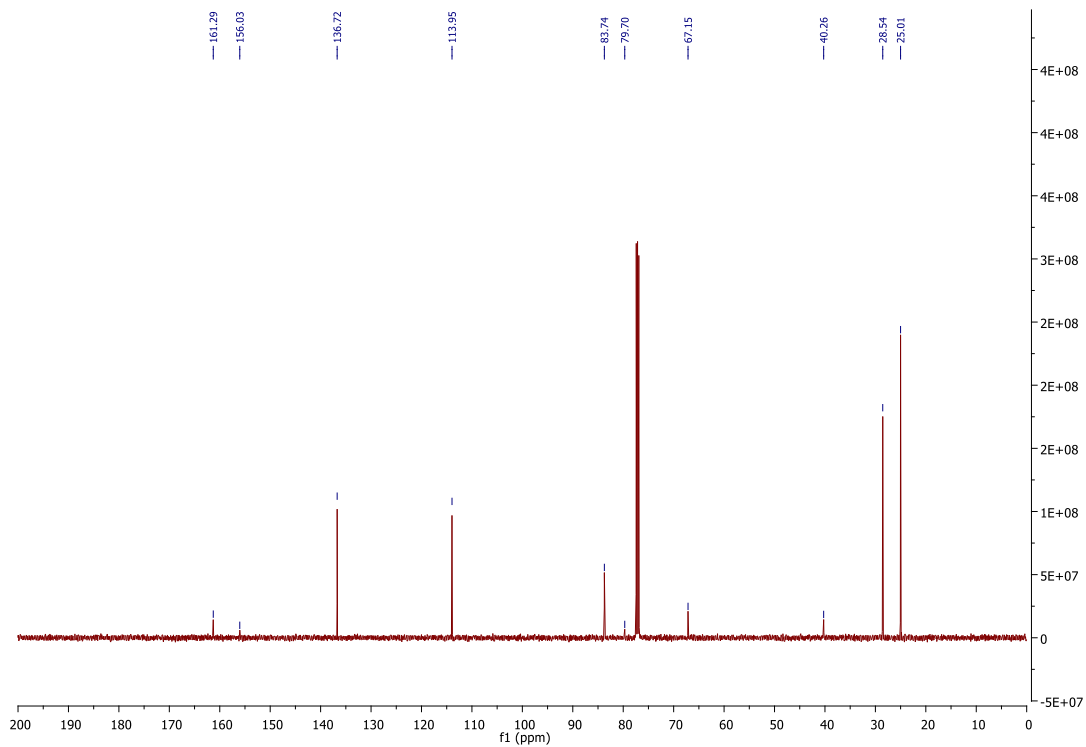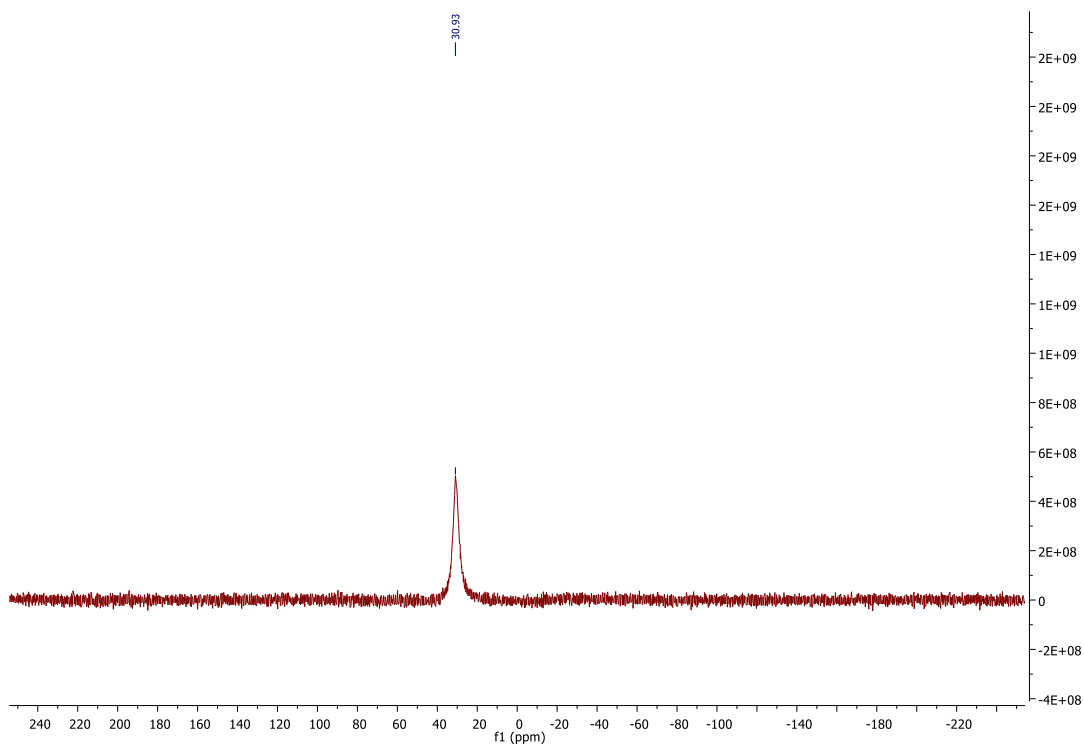

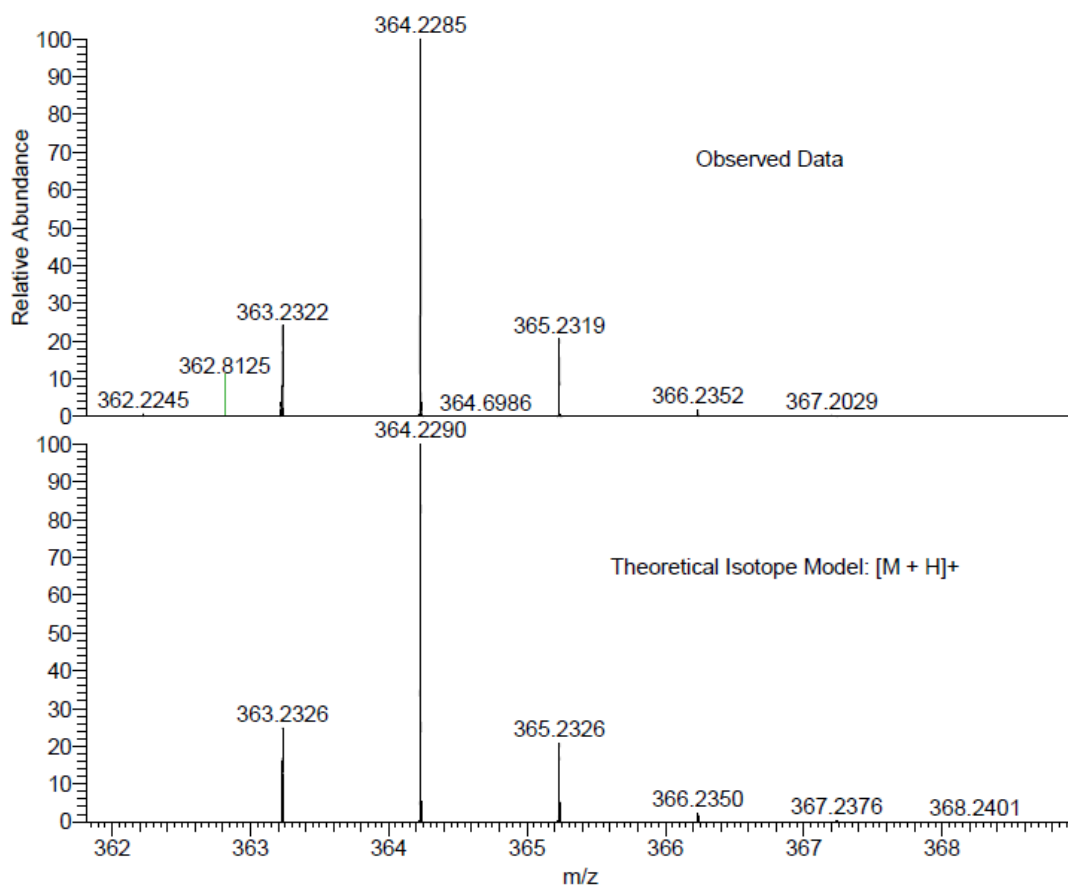

**Spectra for intermediate S6**

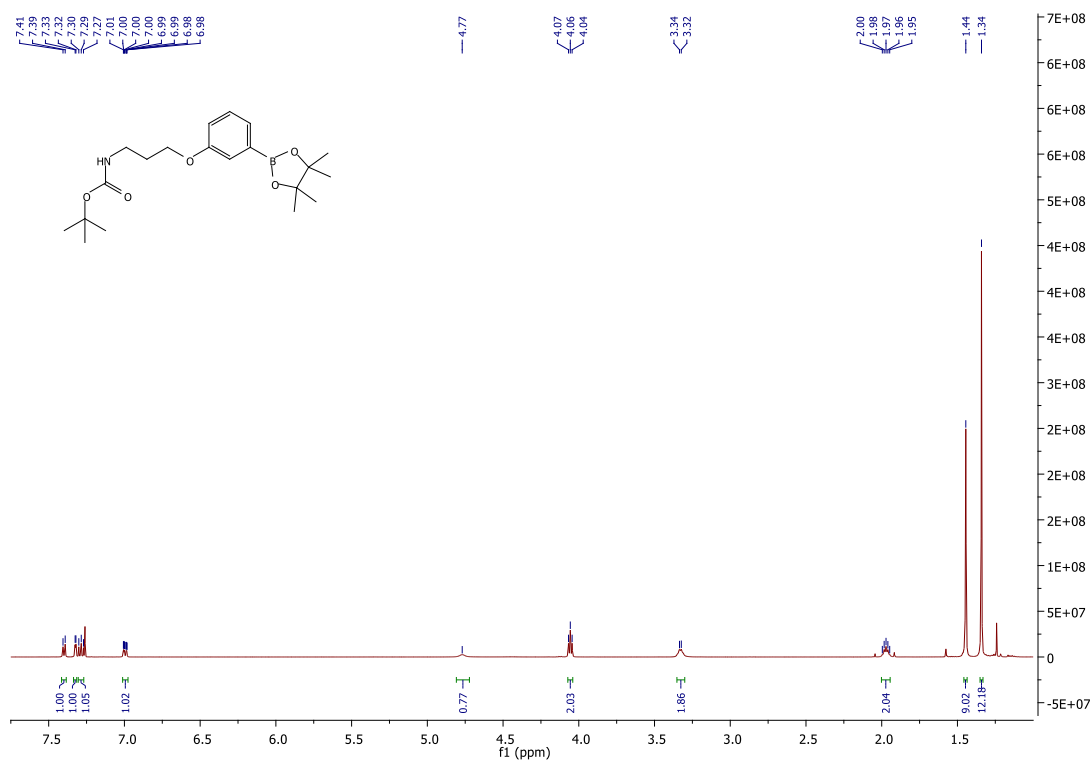



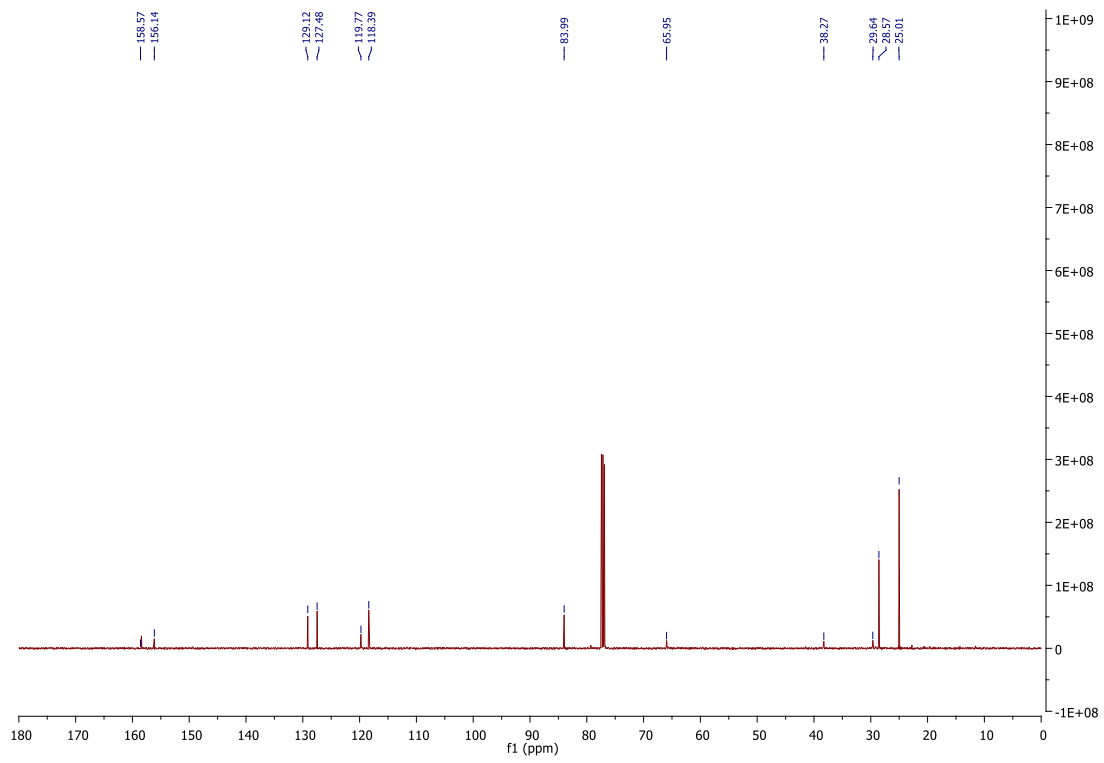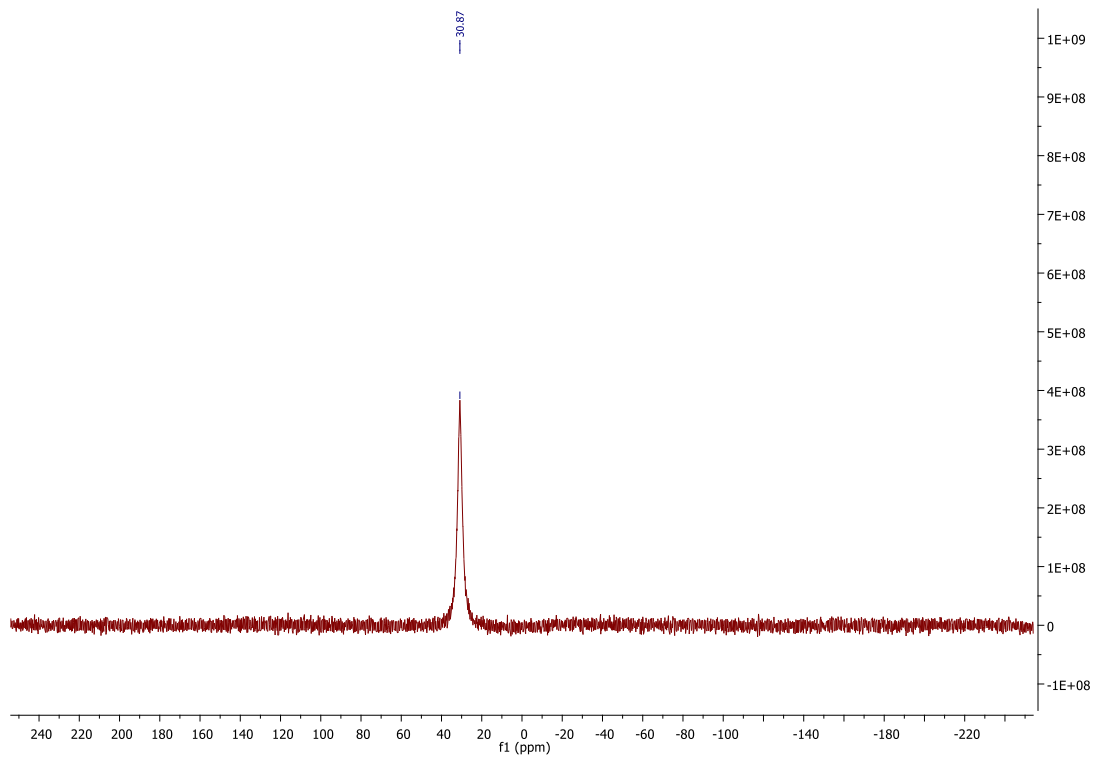

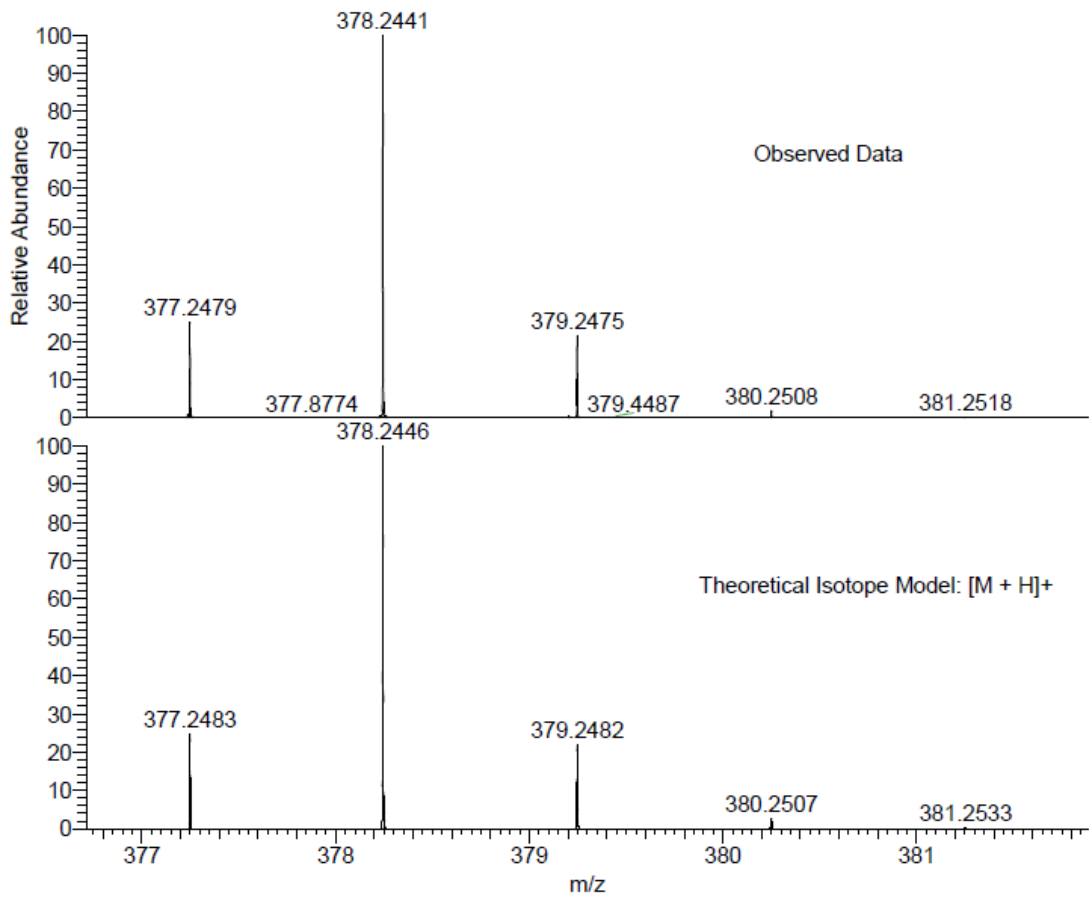

# Spectra for intermediate S7

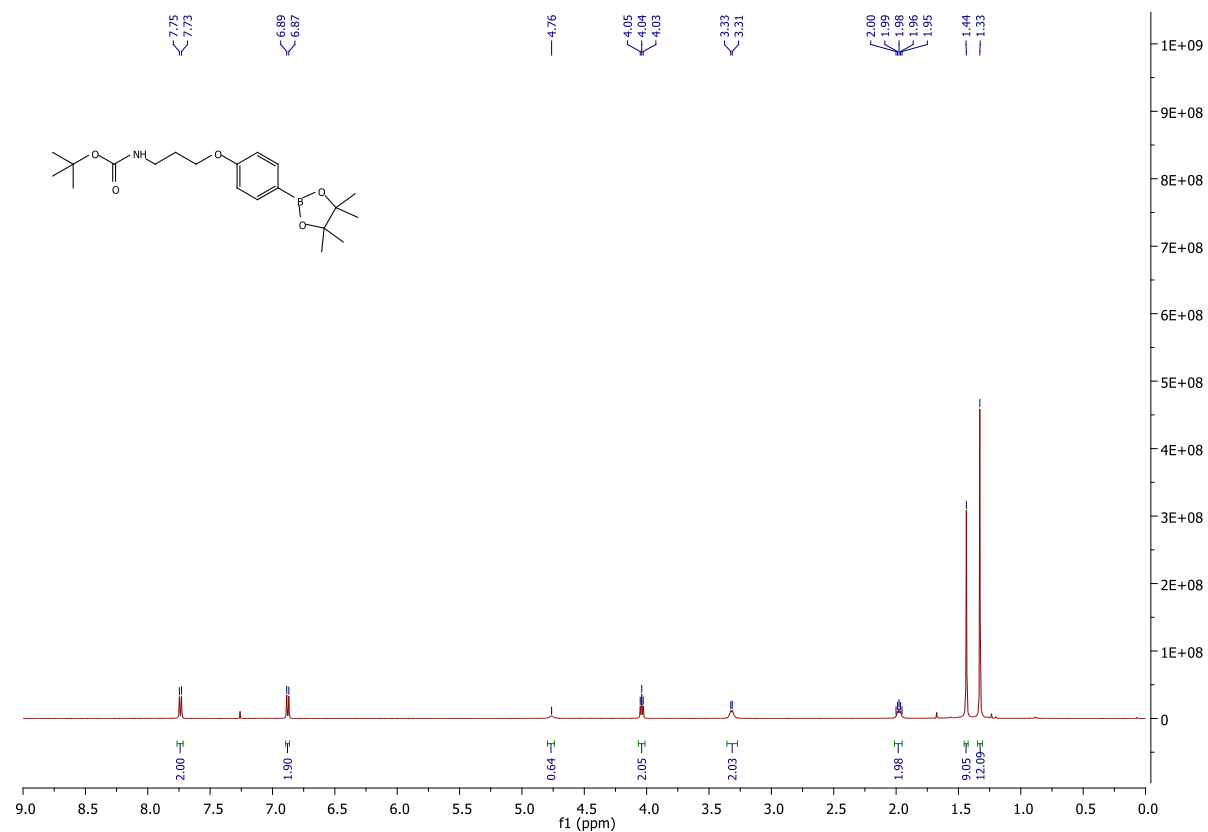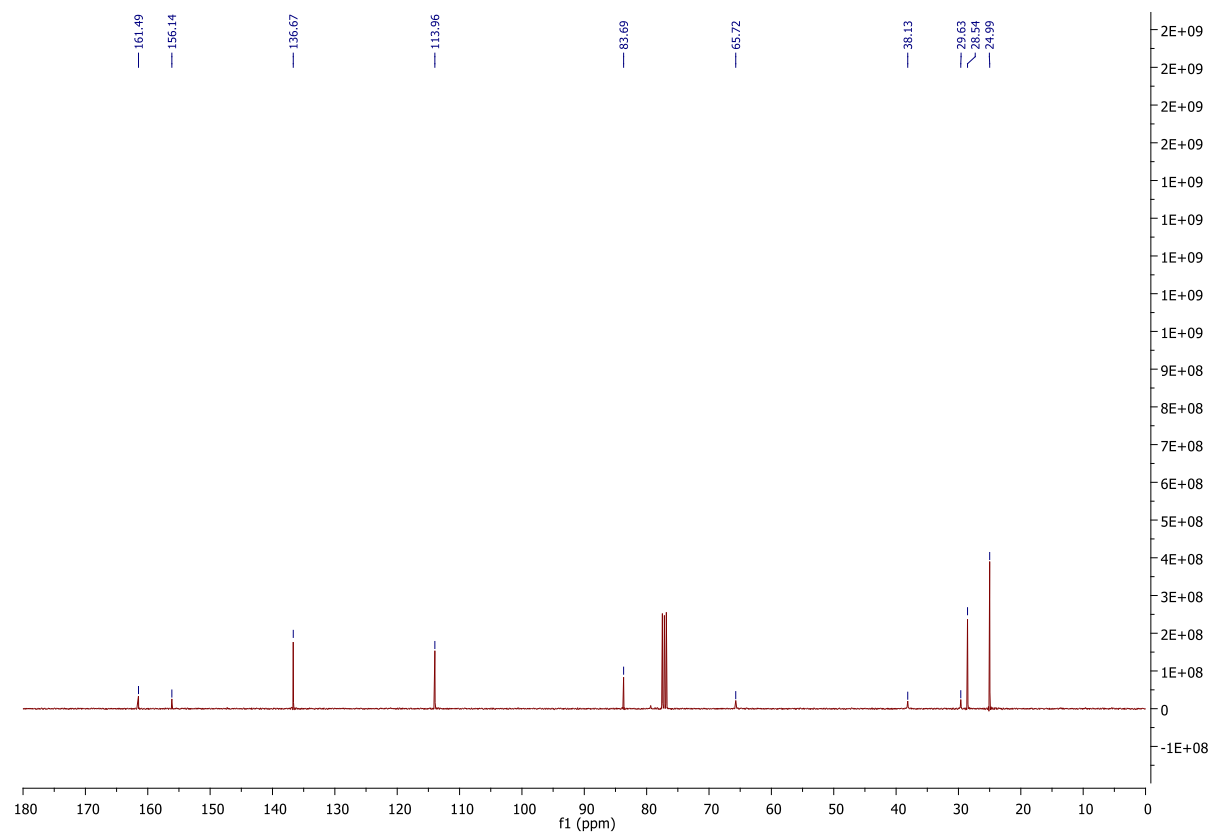



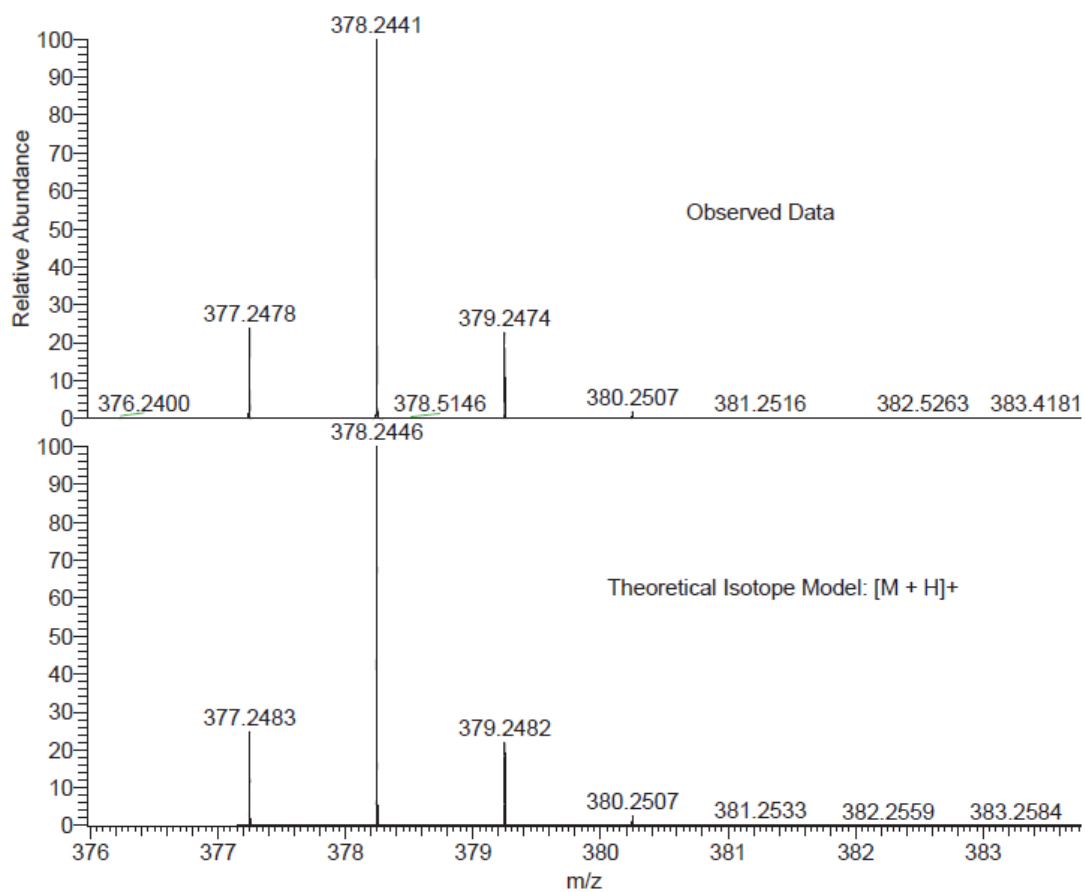

**Spectra for intermediate S8**

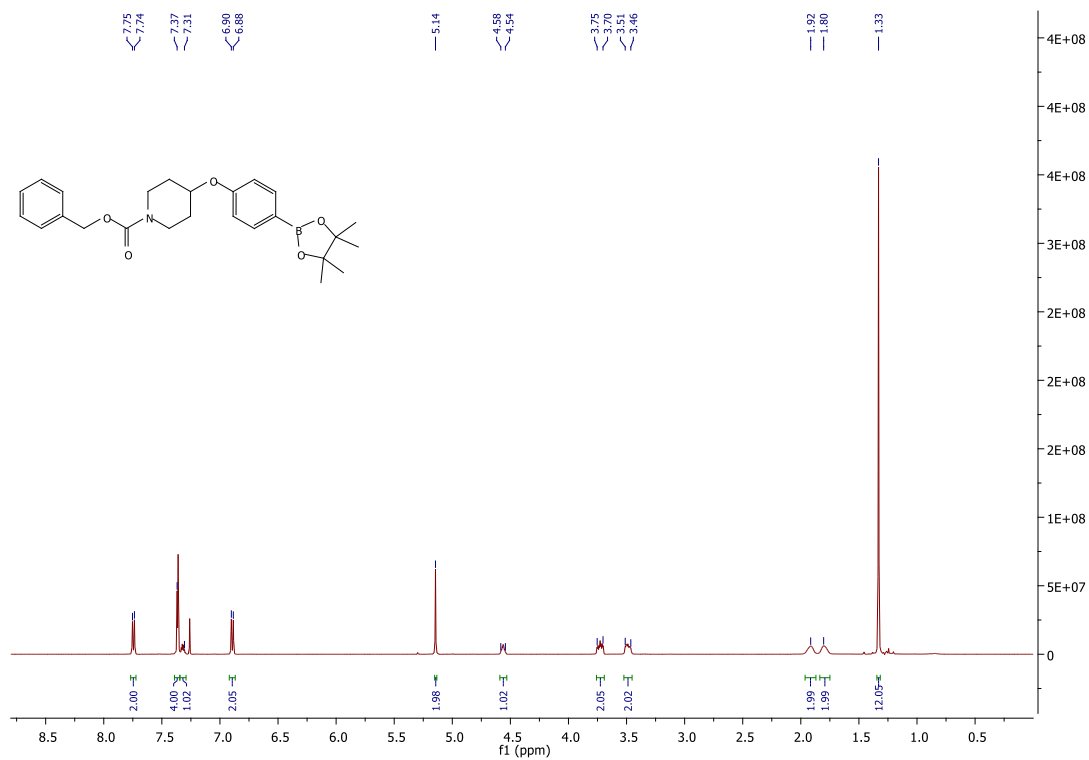

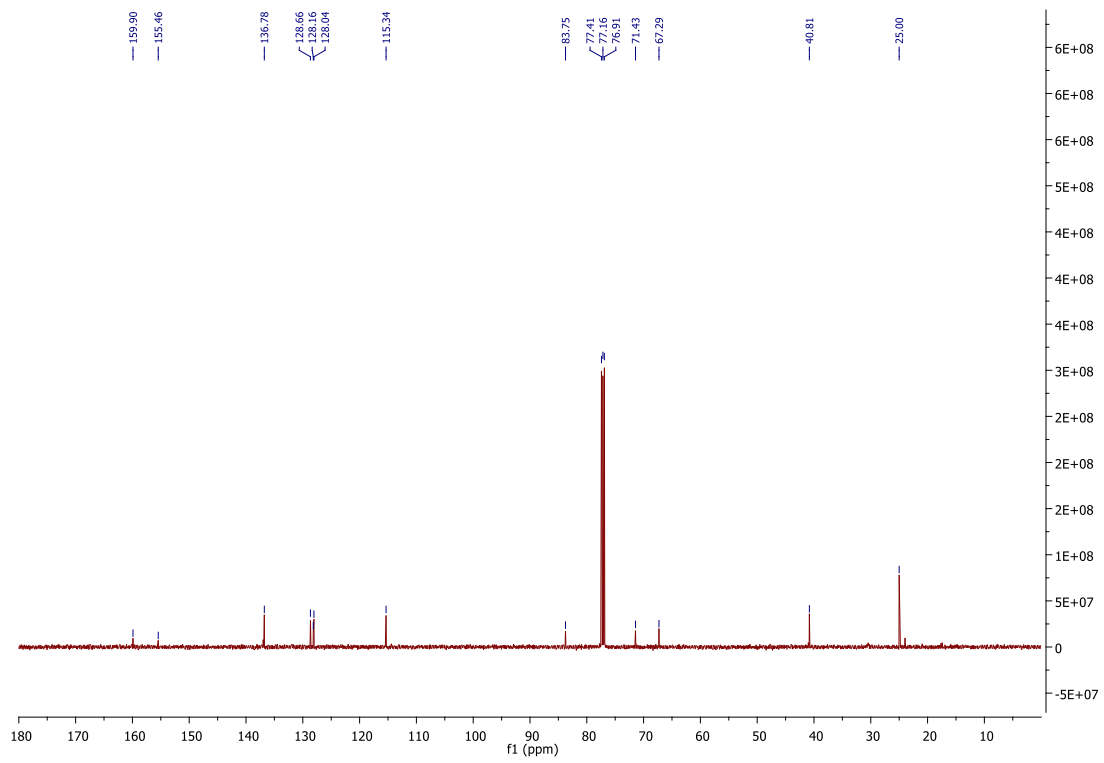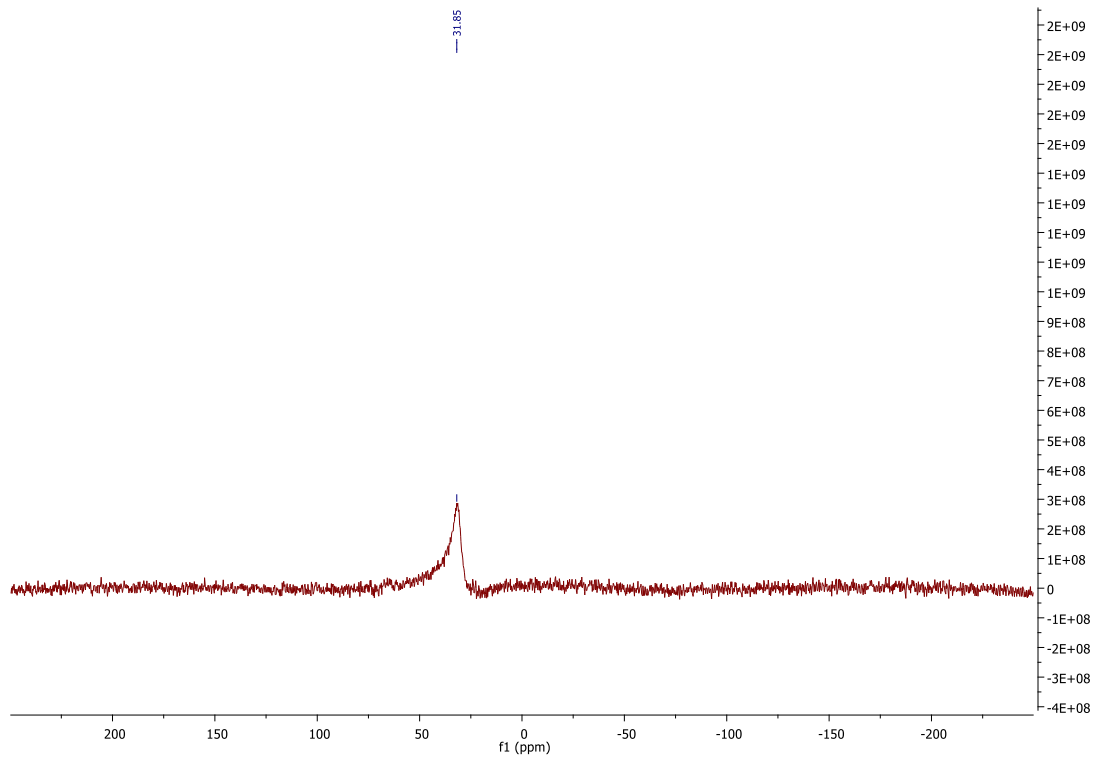

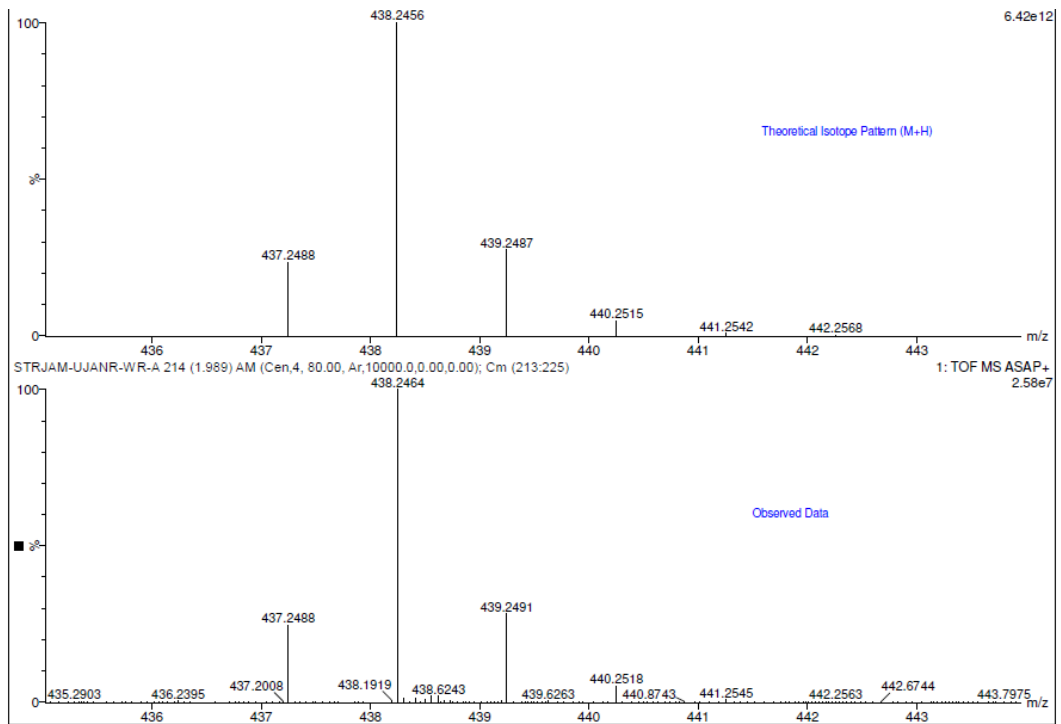

# Spectra for intermediate **S9**

$^1\text{H}$  at 300K

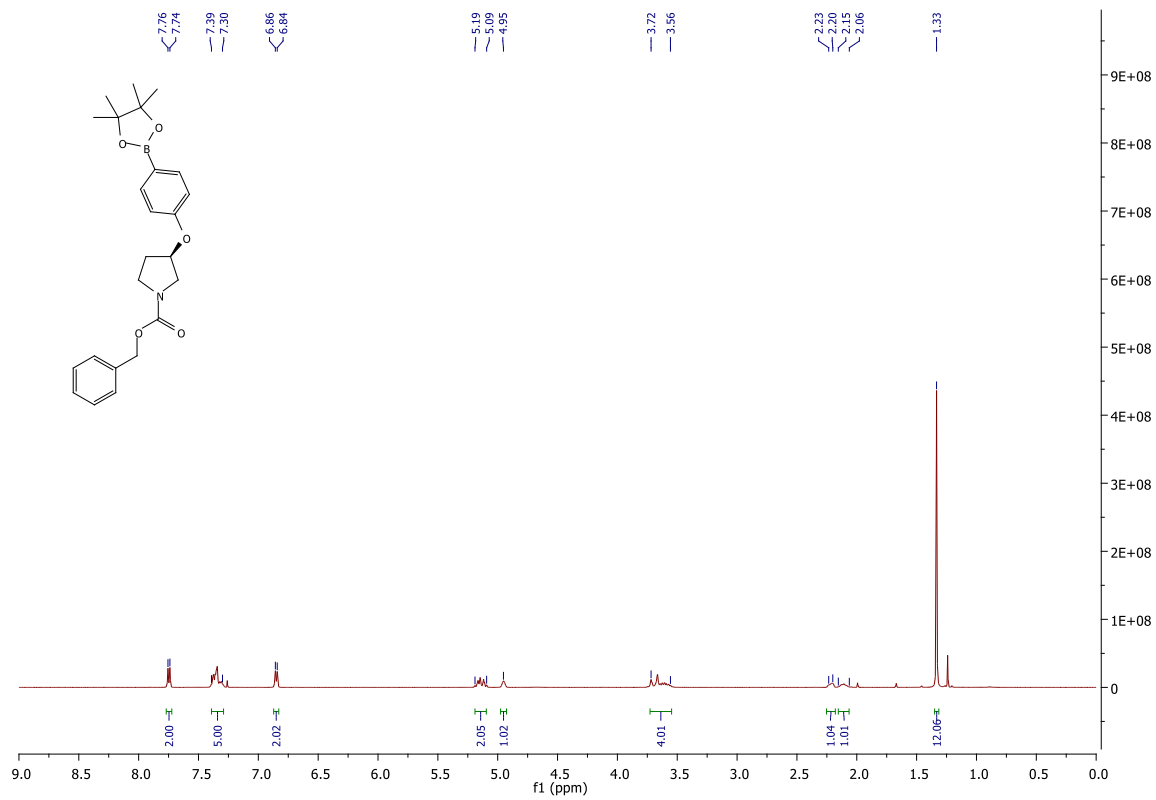



### $^{13}\text{C}$ at 300K

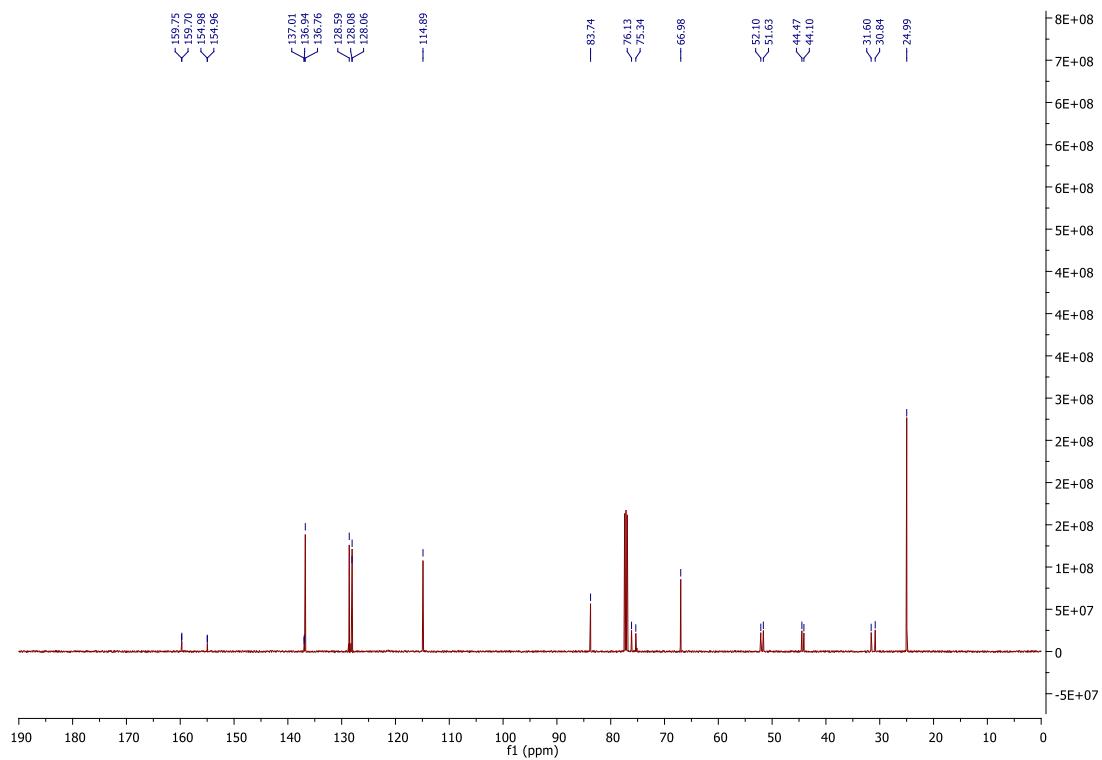

### $^1\text{H}$ at 373K

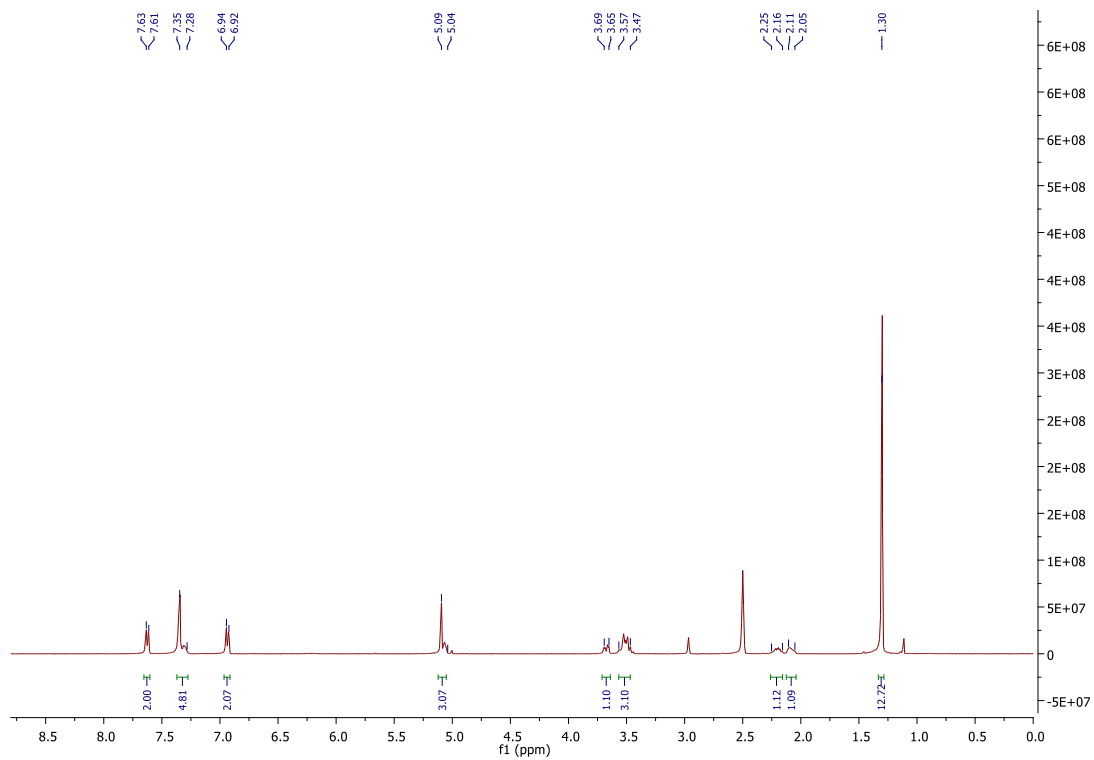

$^{13}\text{C}$  at 373K

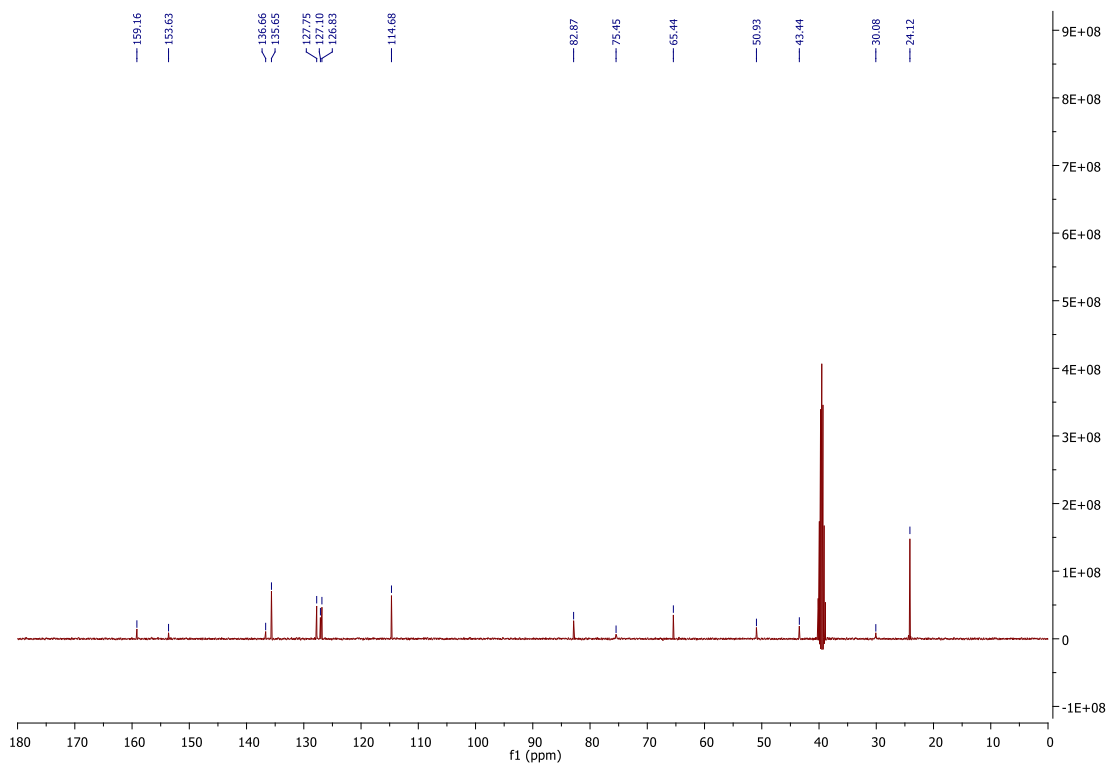

$^{11}\text{B}$

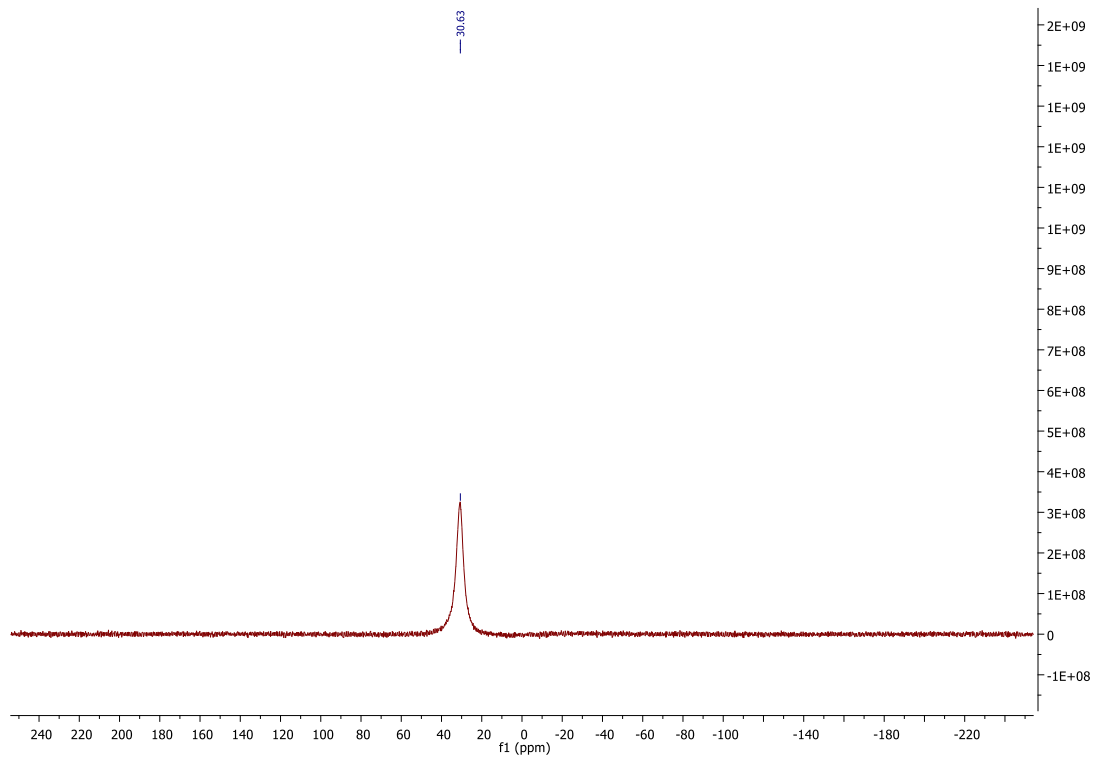

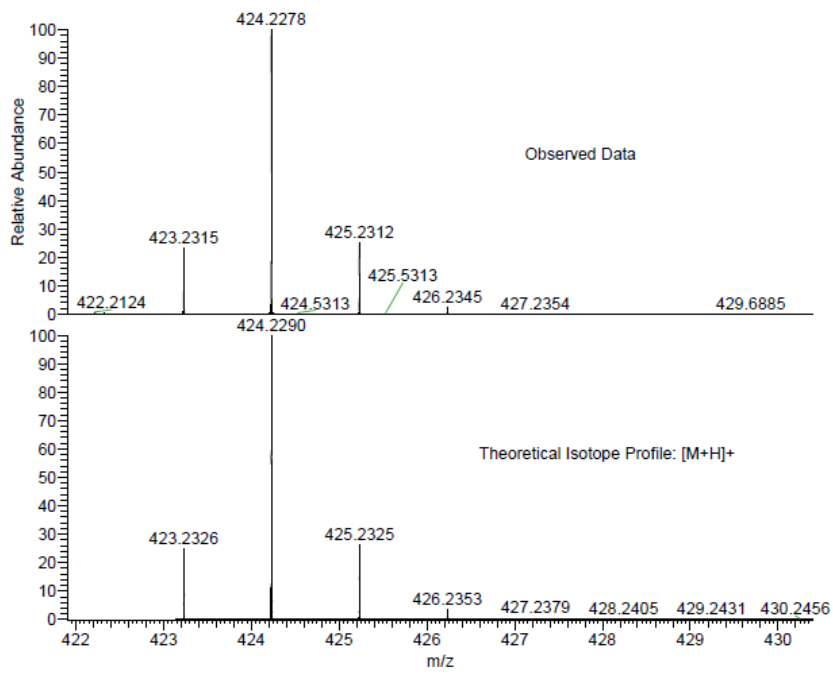

# Spectra for intermediate **S10**

$^1\text{H}$  at 373K

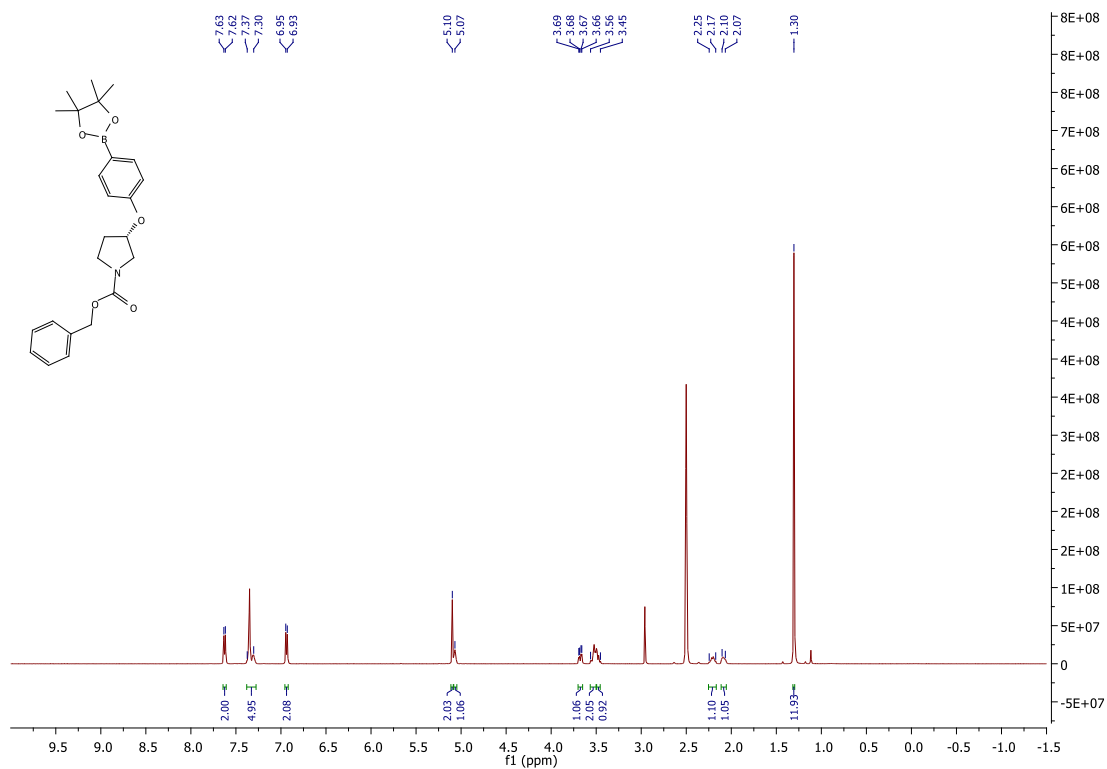

$^{13}\text{C}$  at 373K

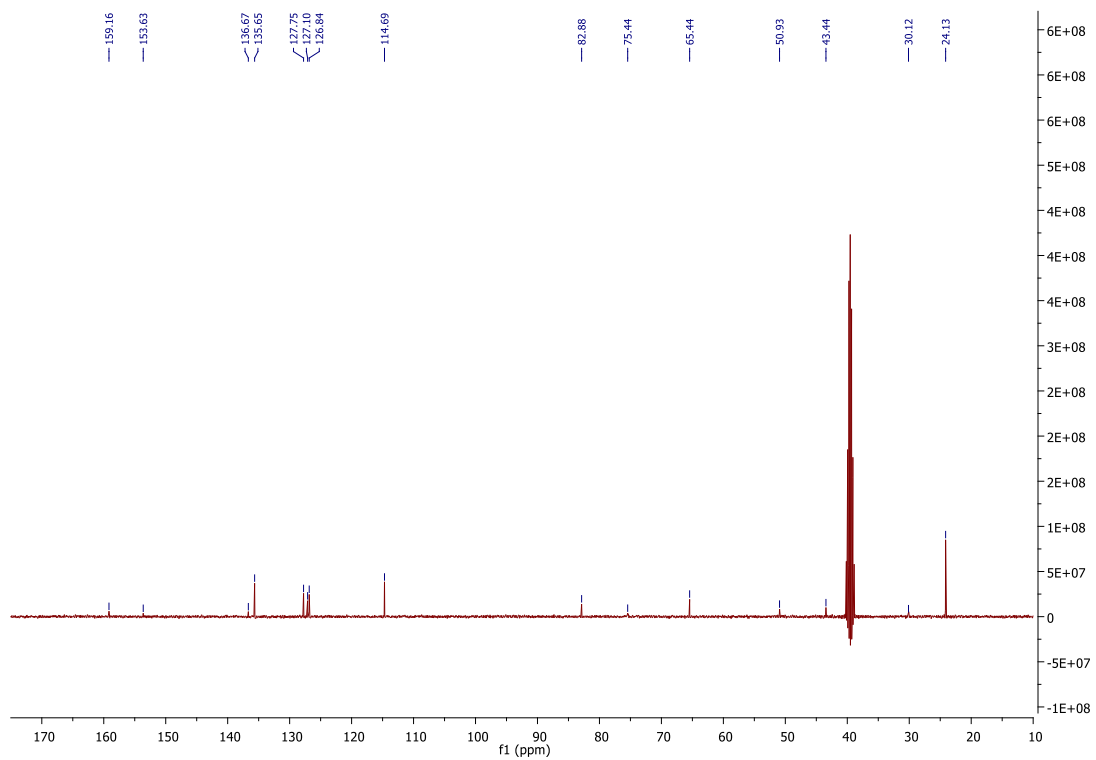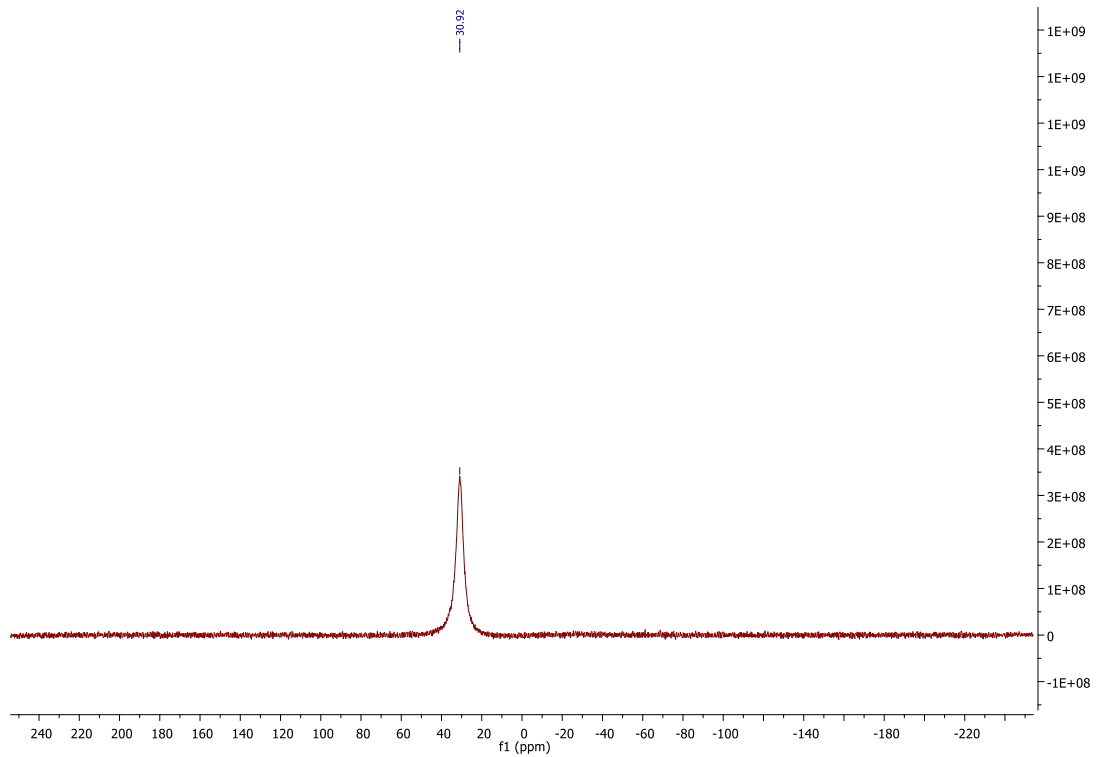

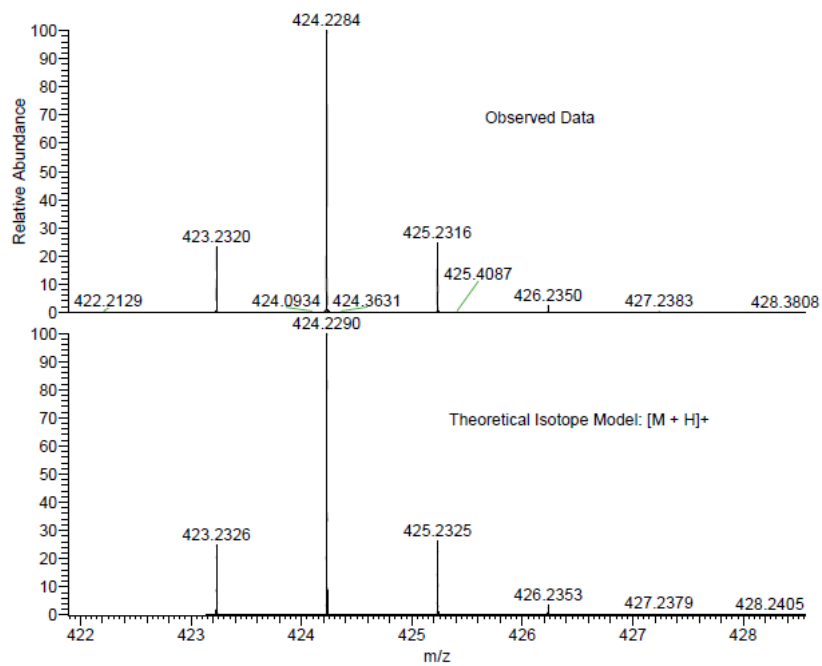

**Spectra for 10**

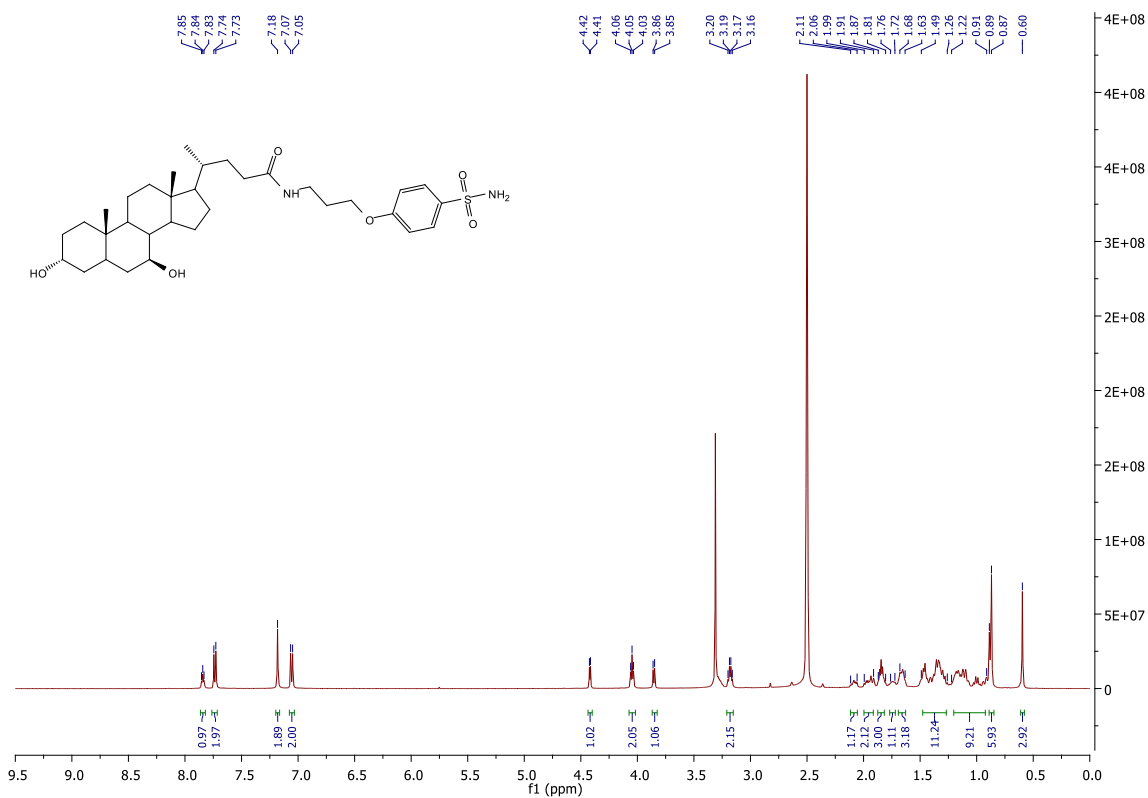

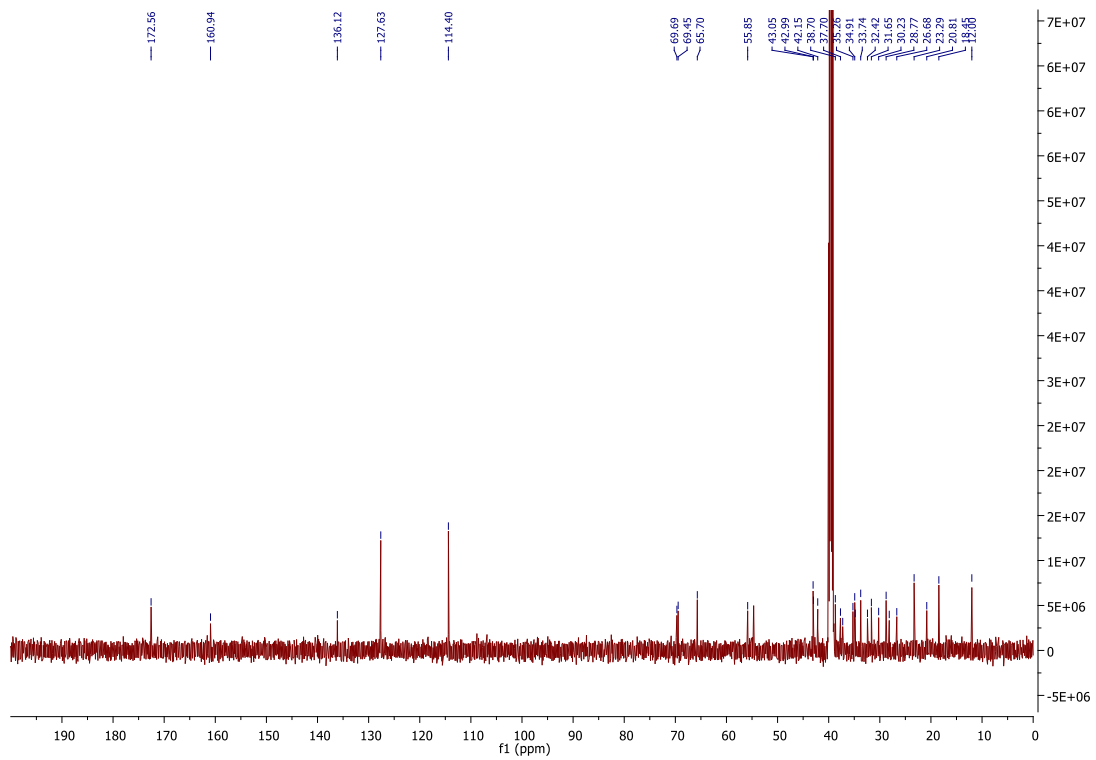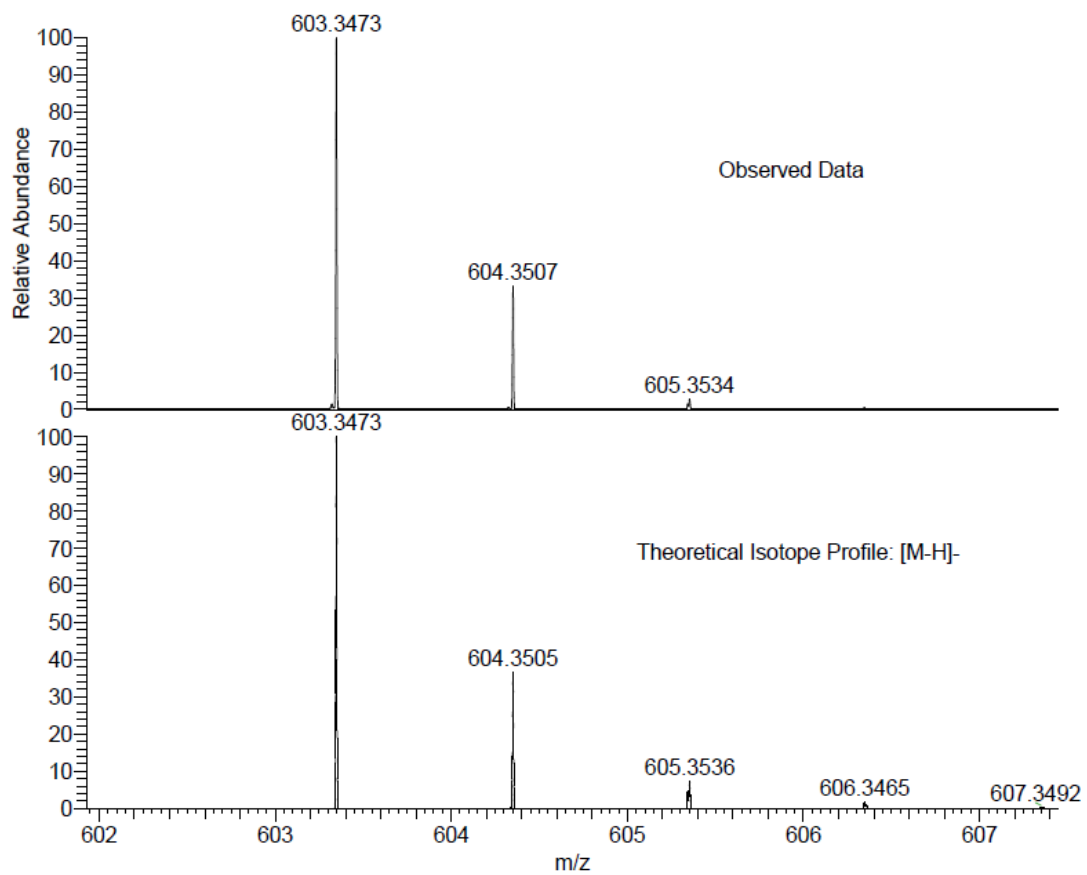

# Spectra for 11

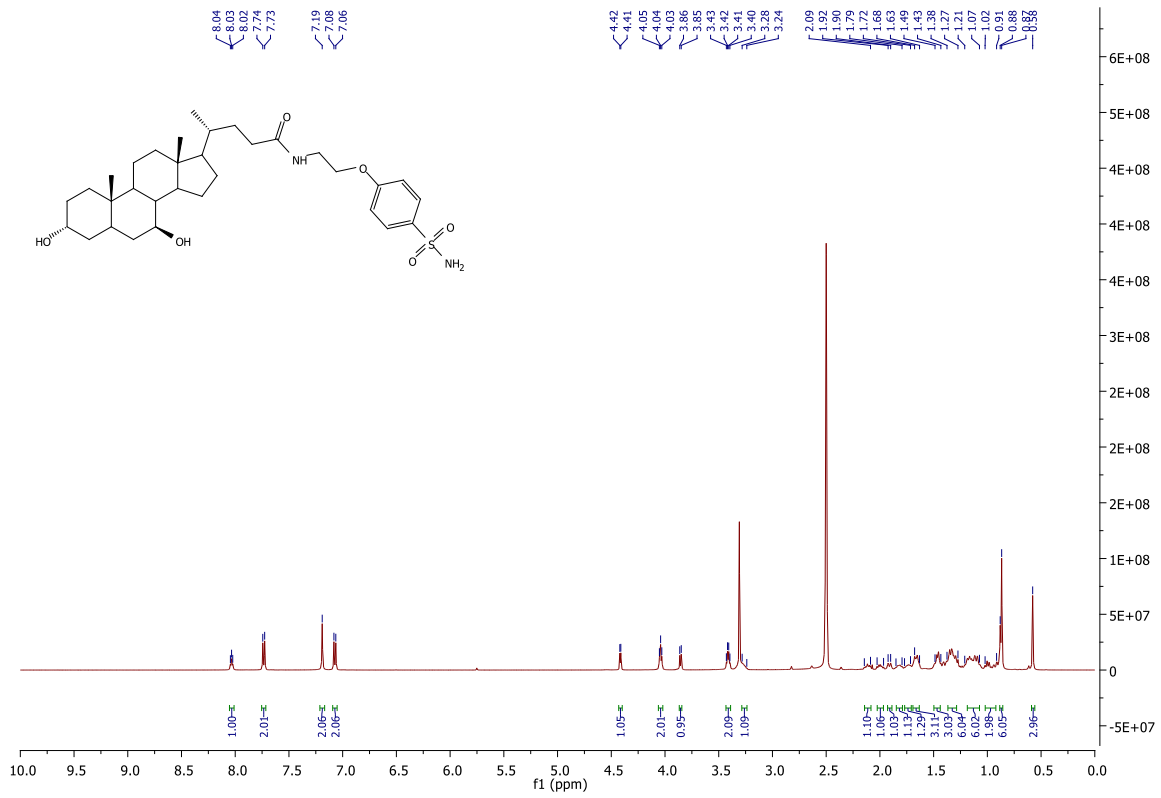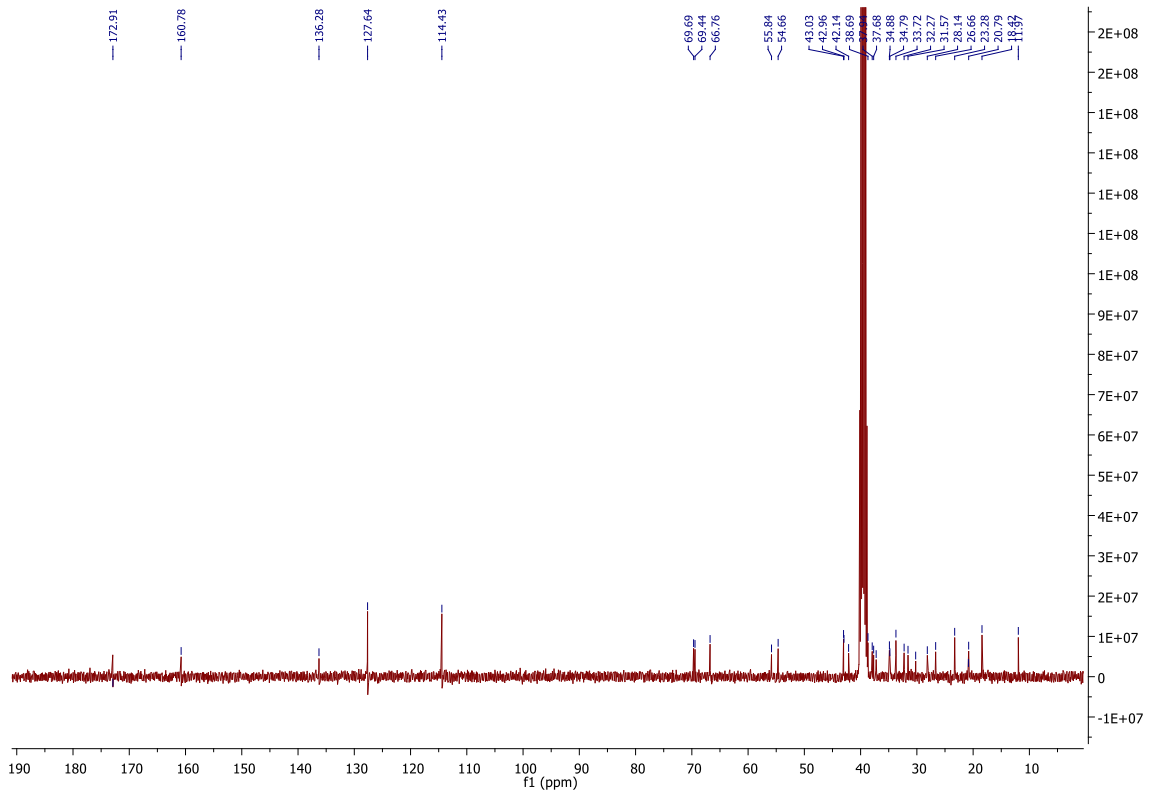





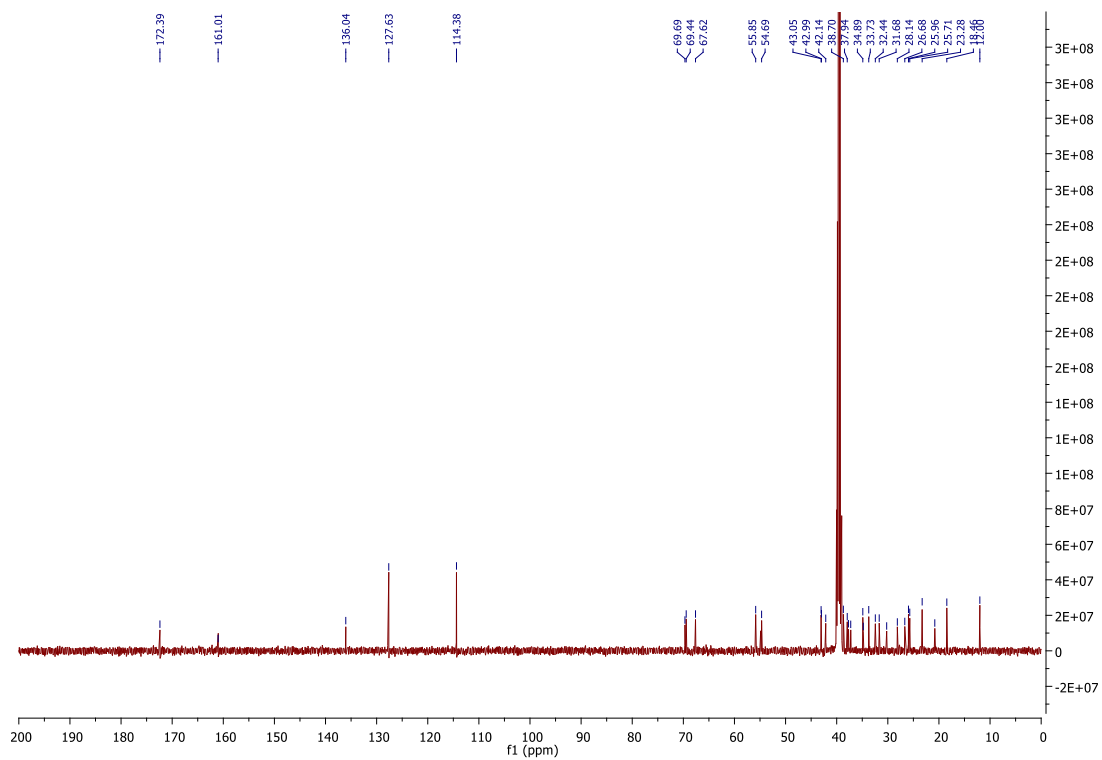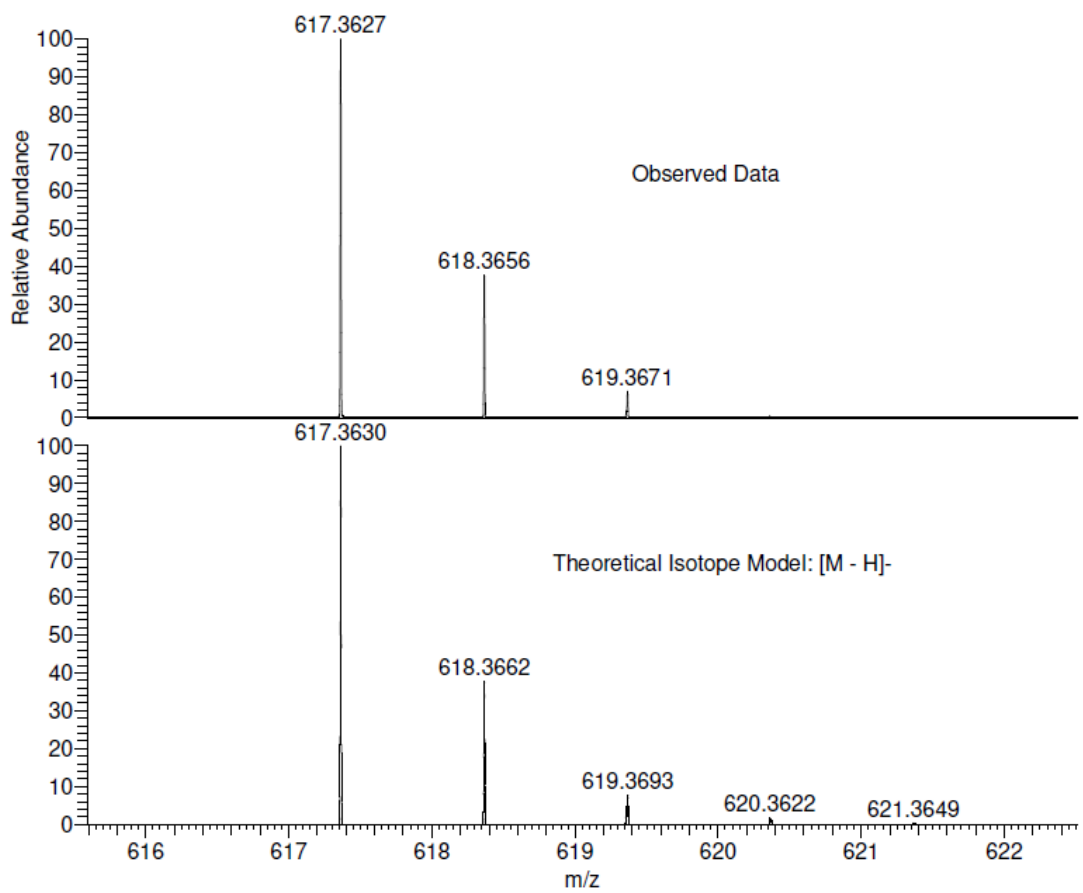

# Spectra for 13

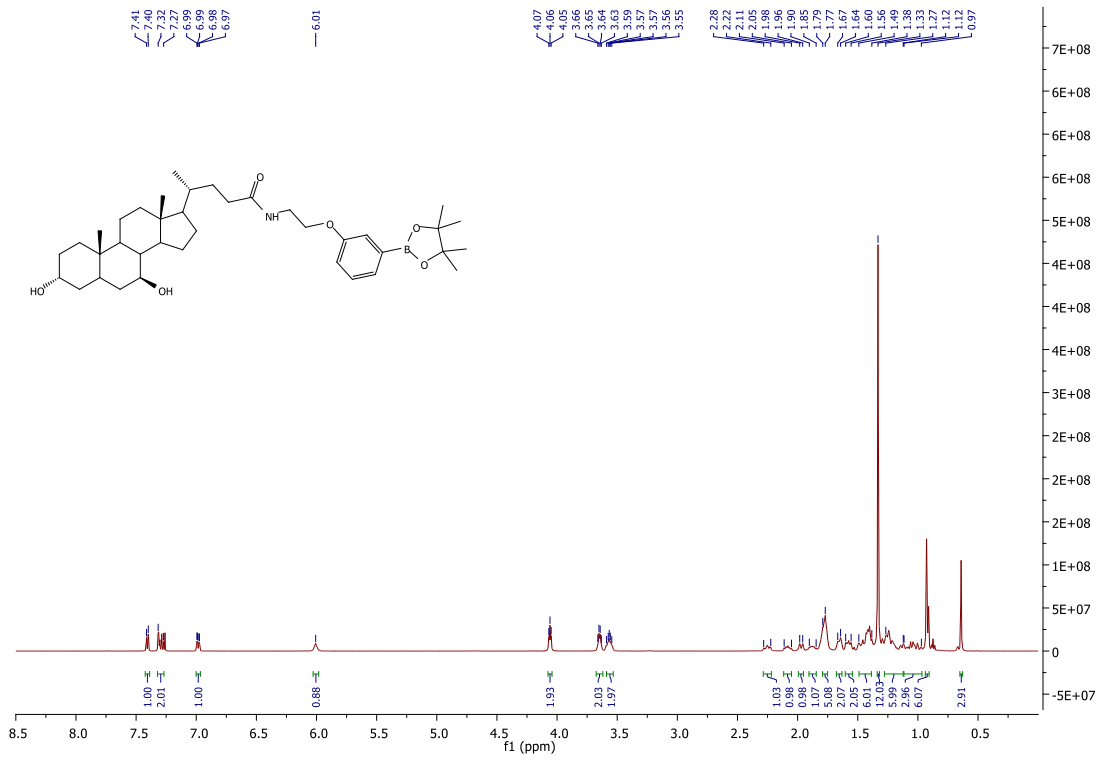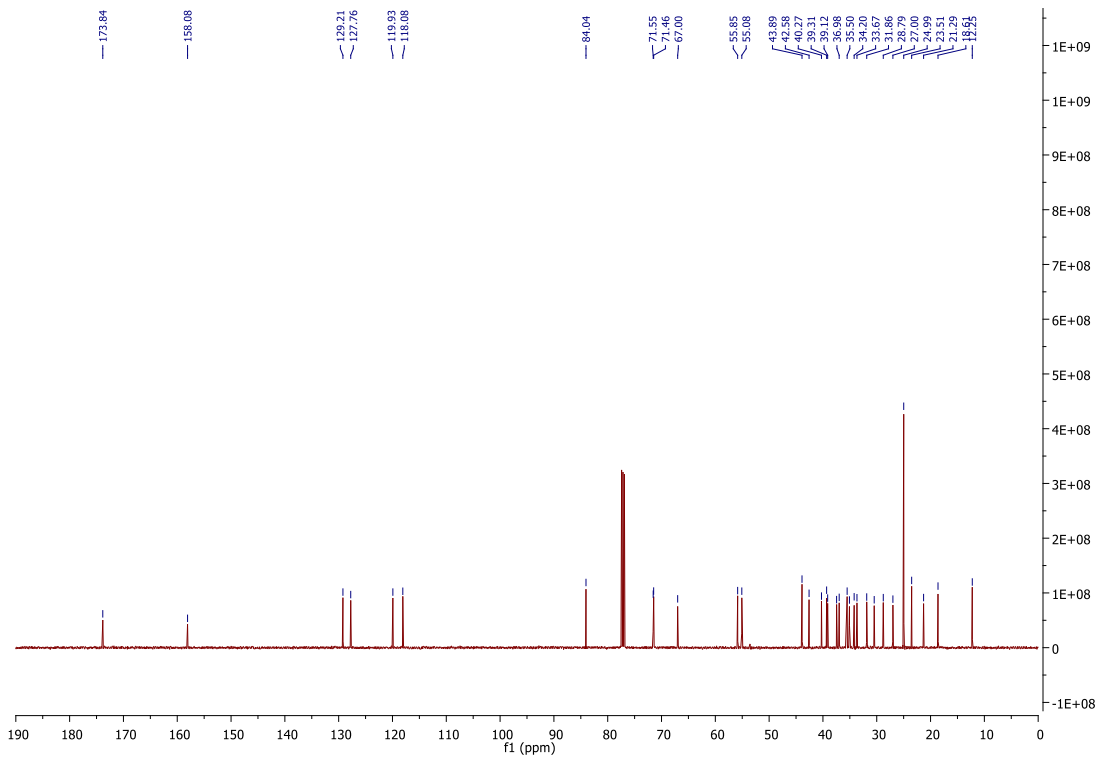

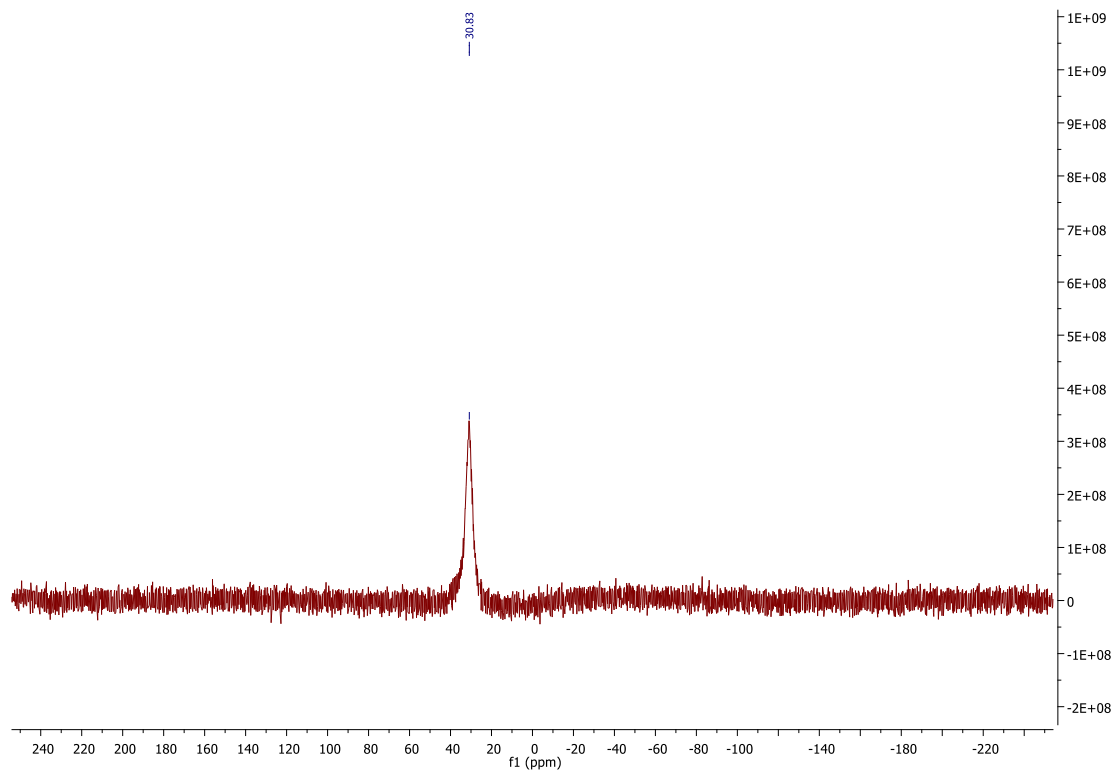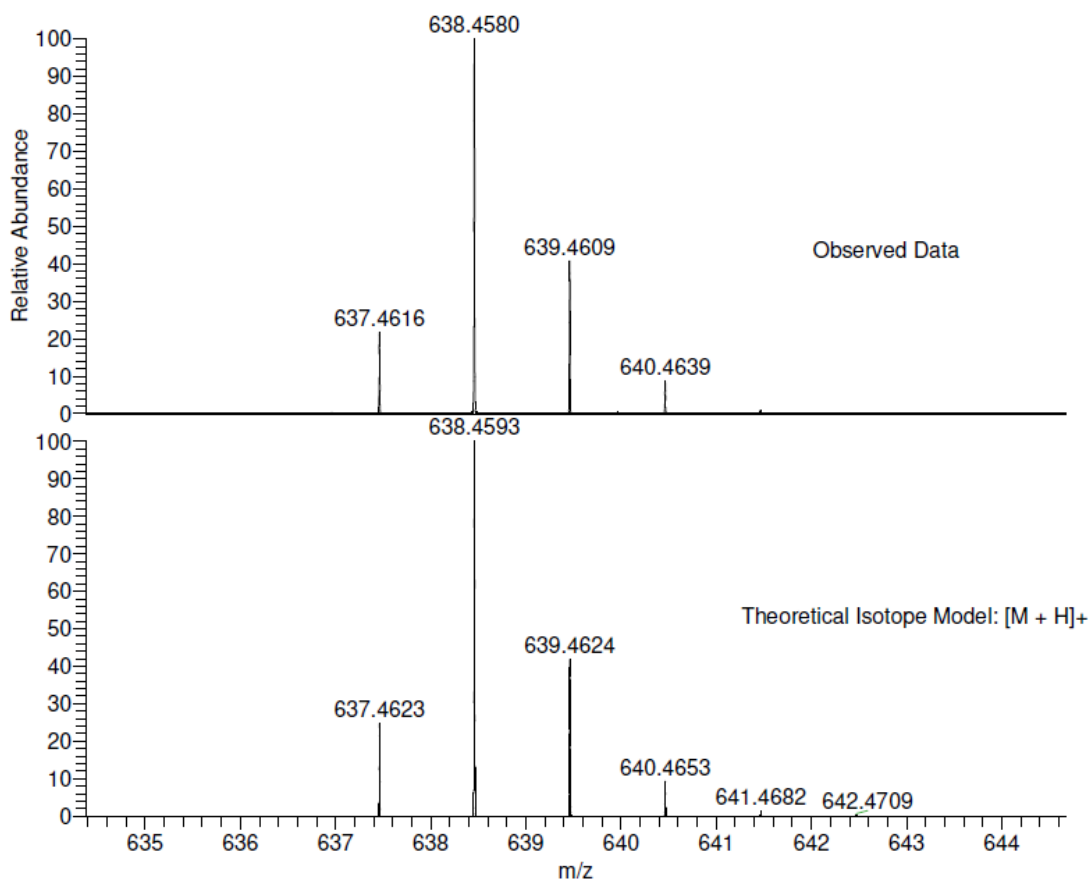

# Spectra for 14

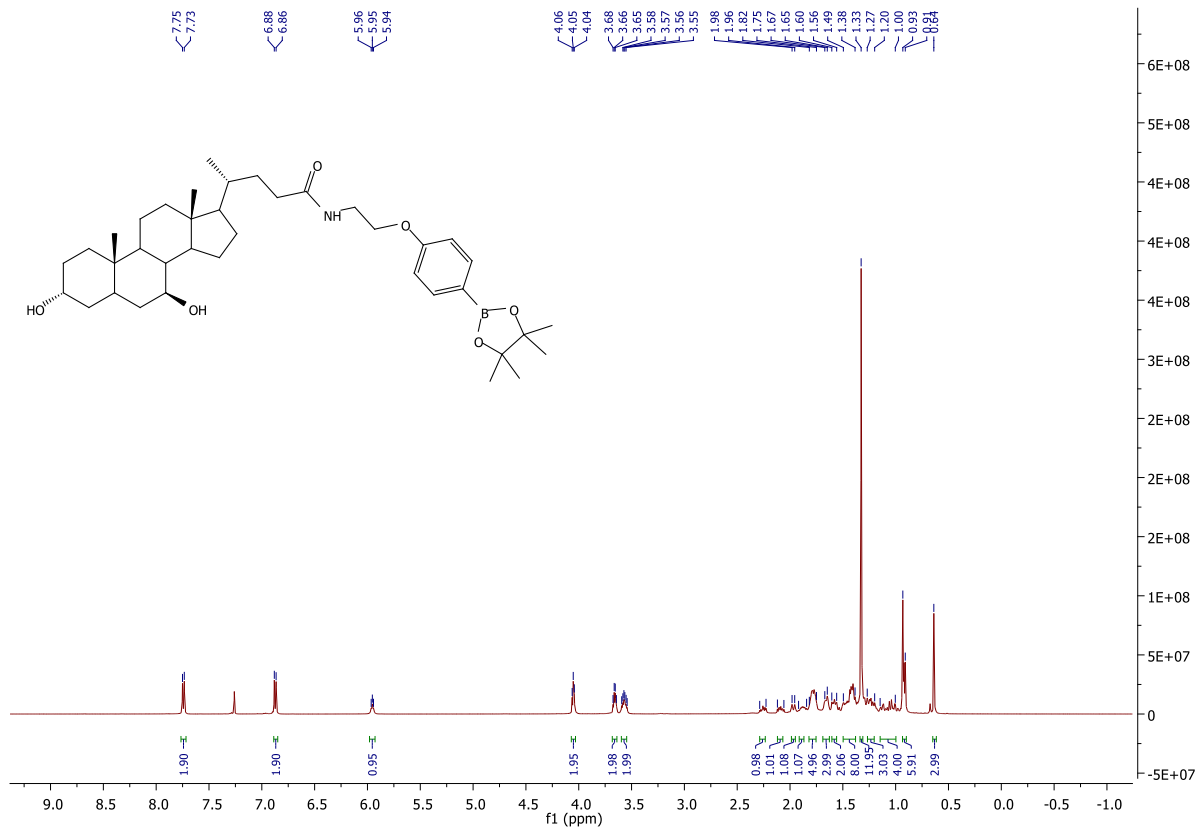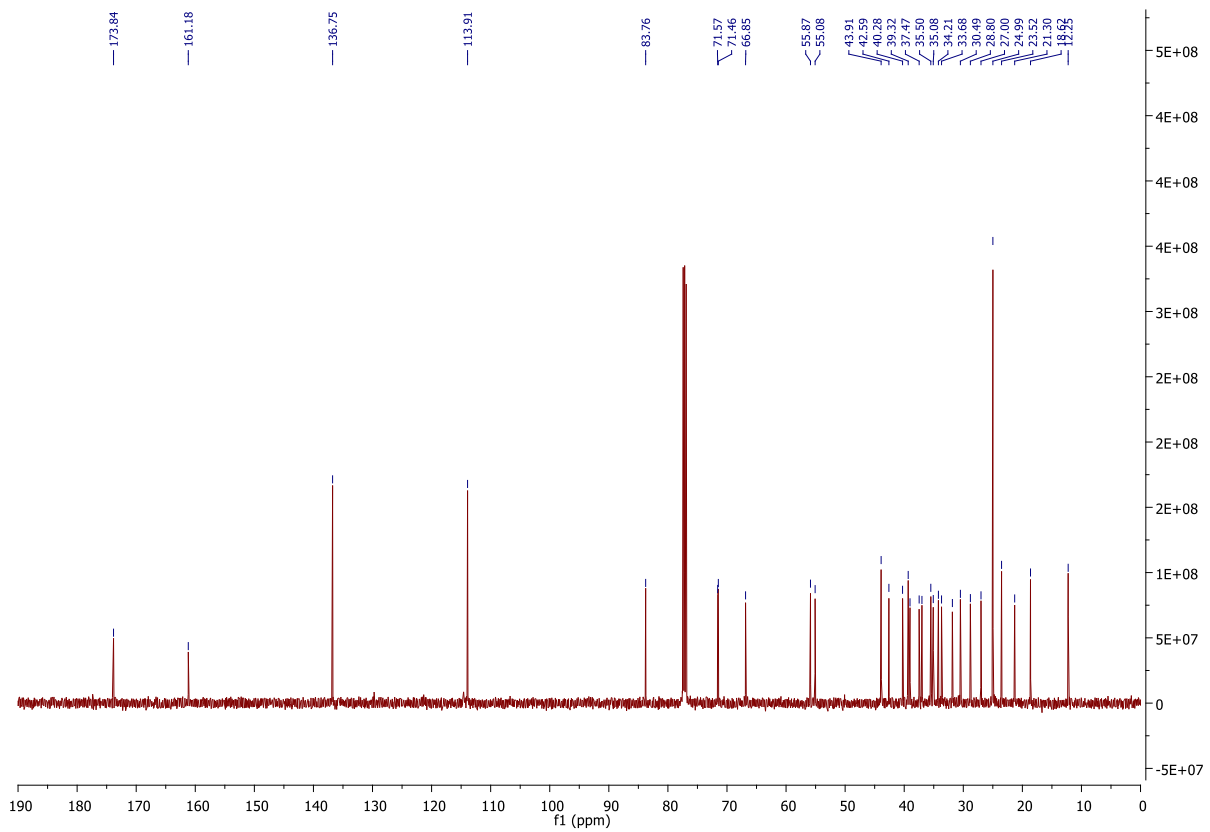

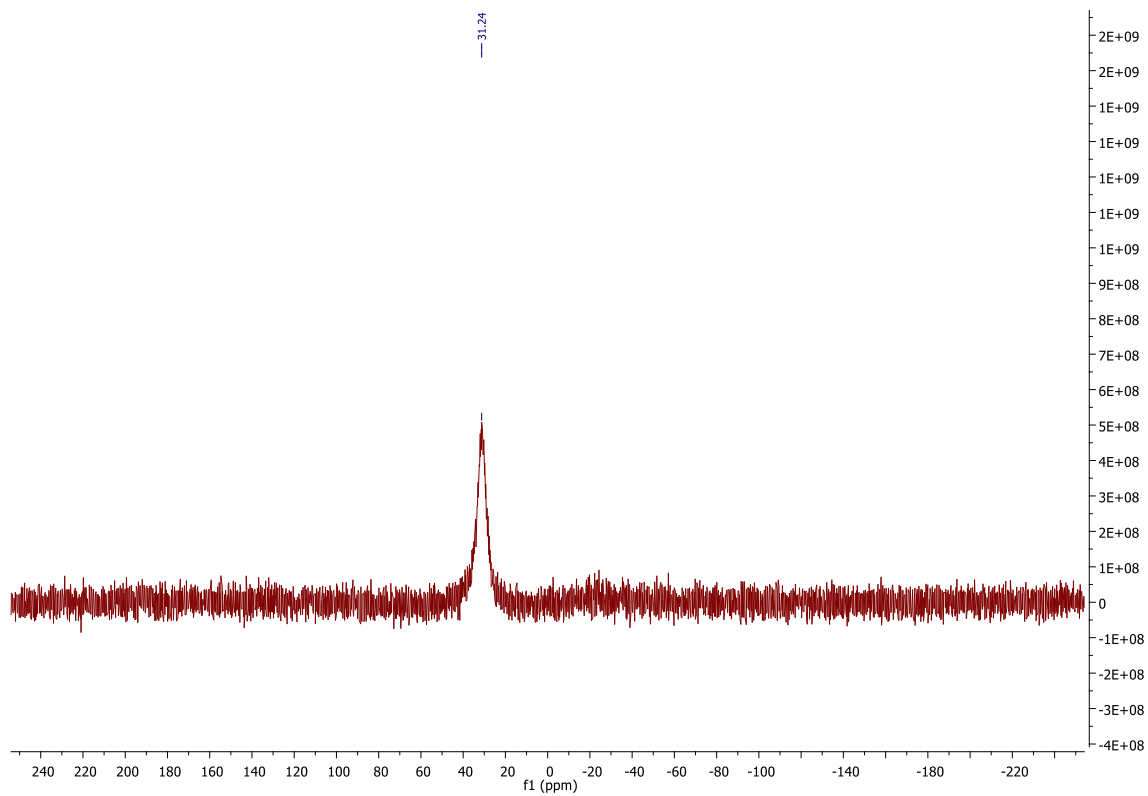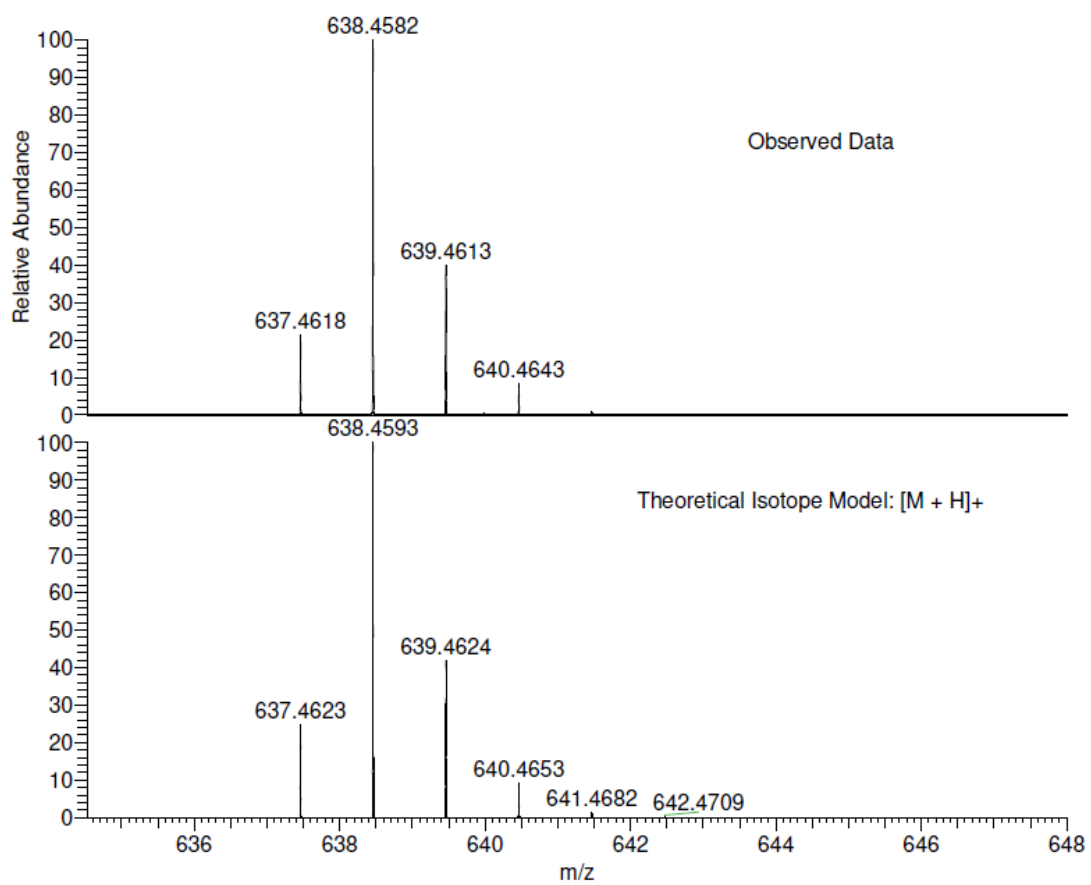

# Spectra for 15

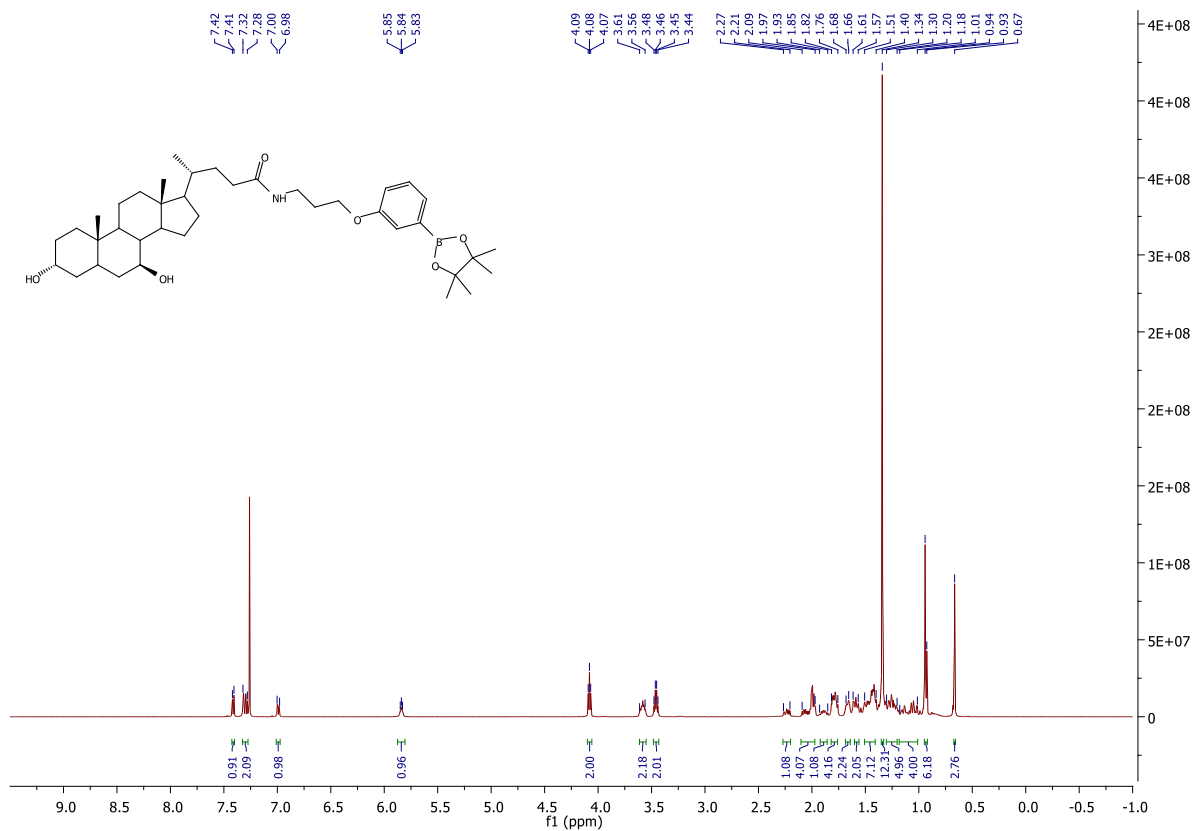

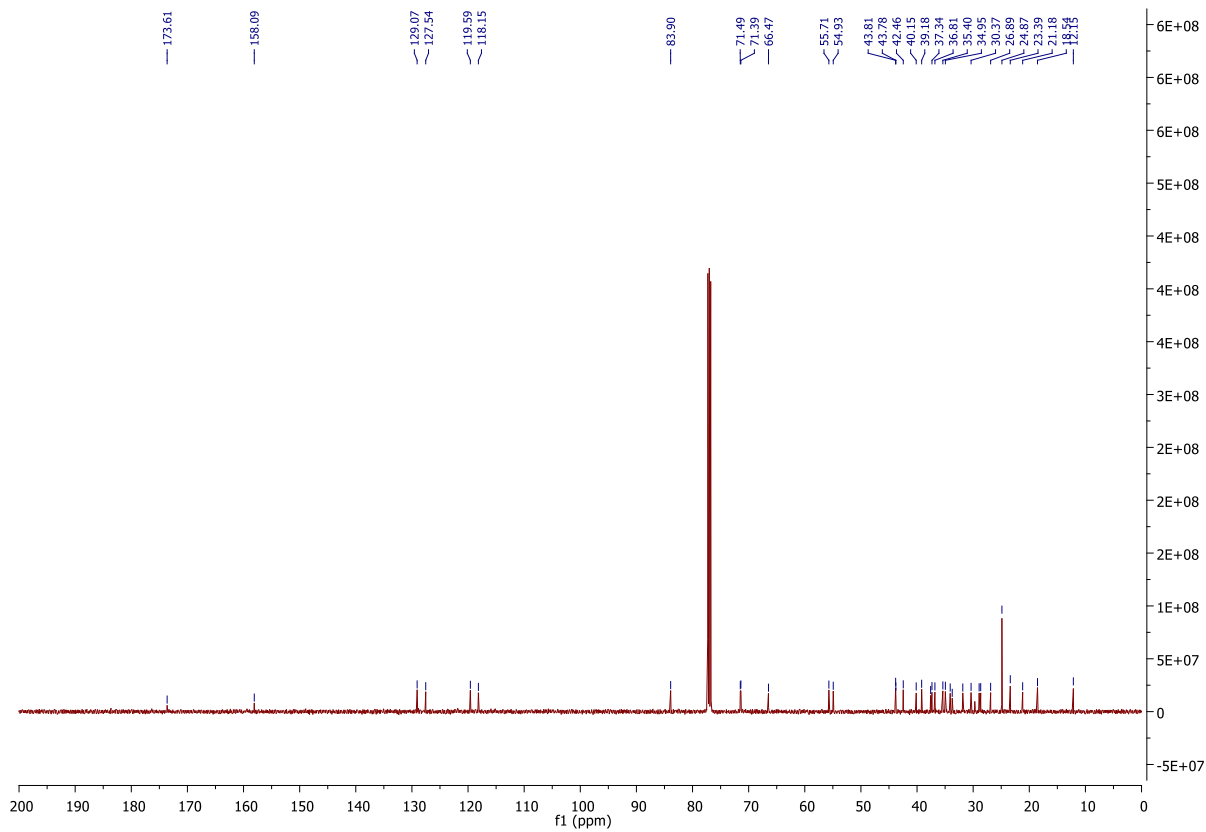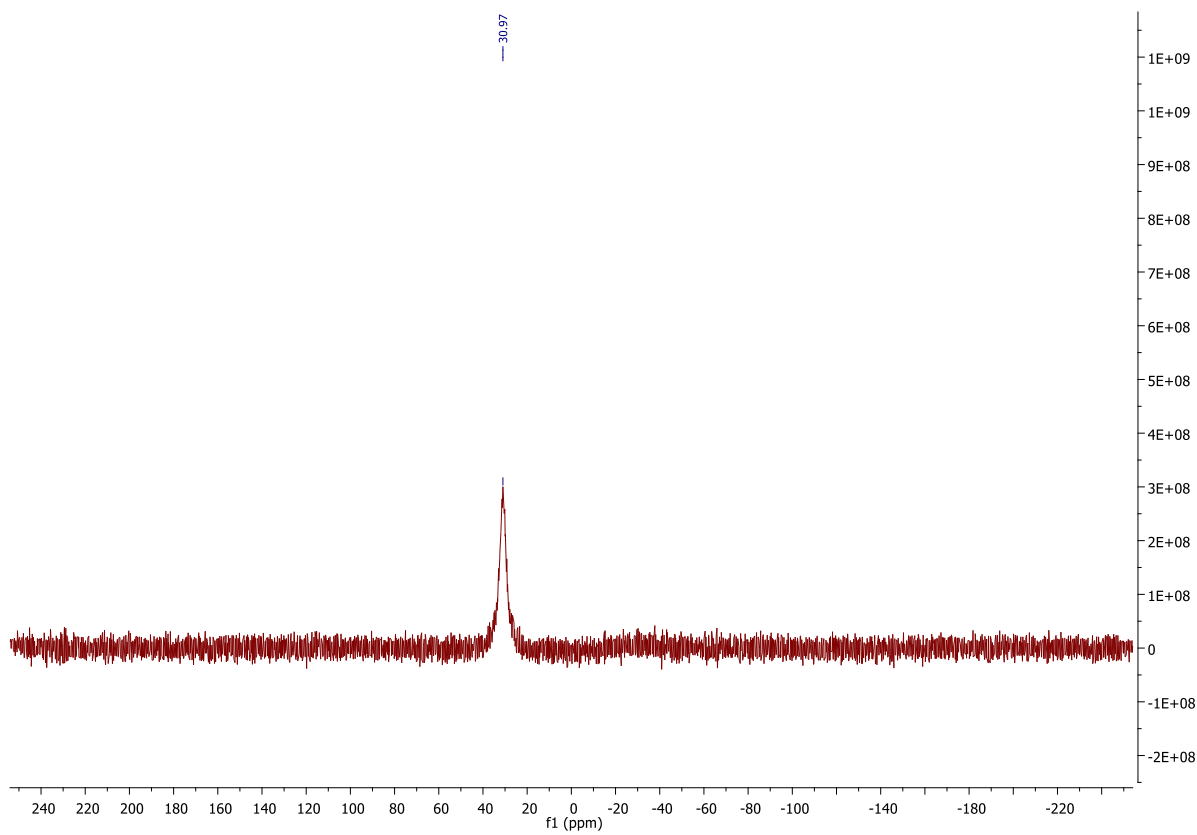



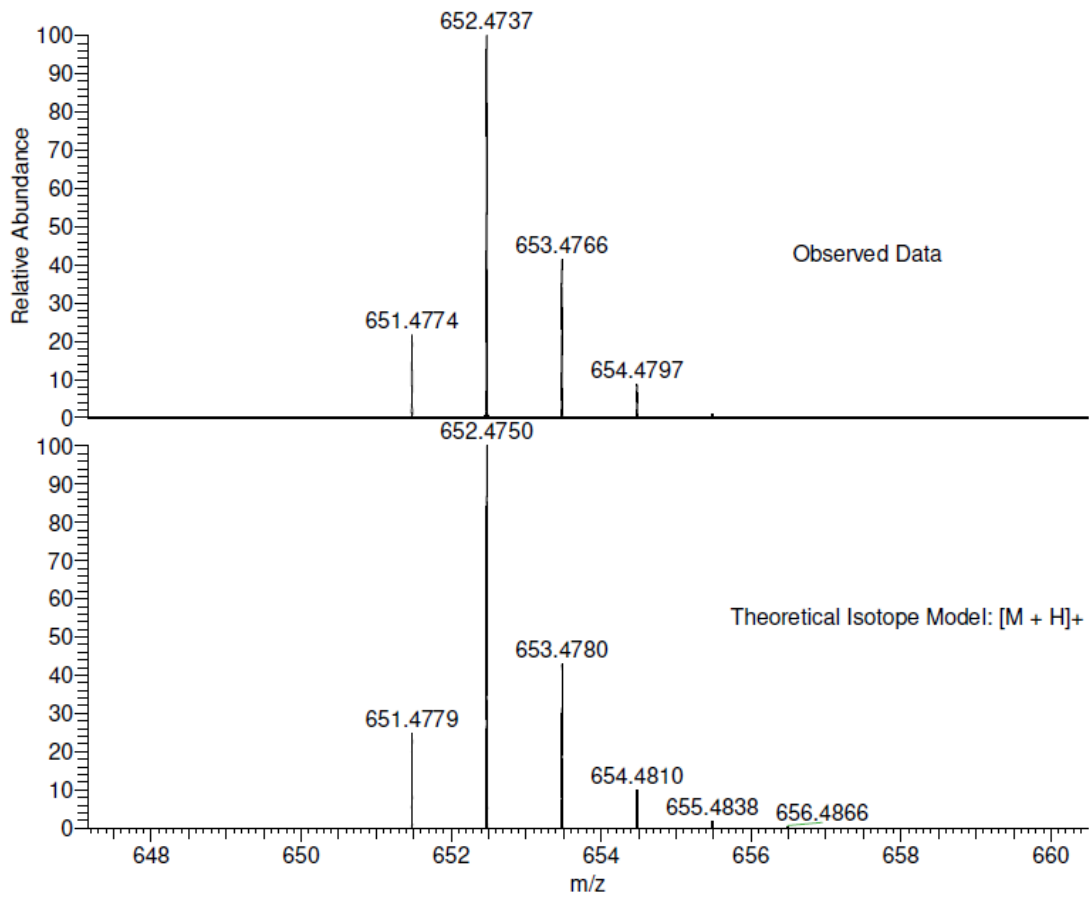

### Spectra for 16

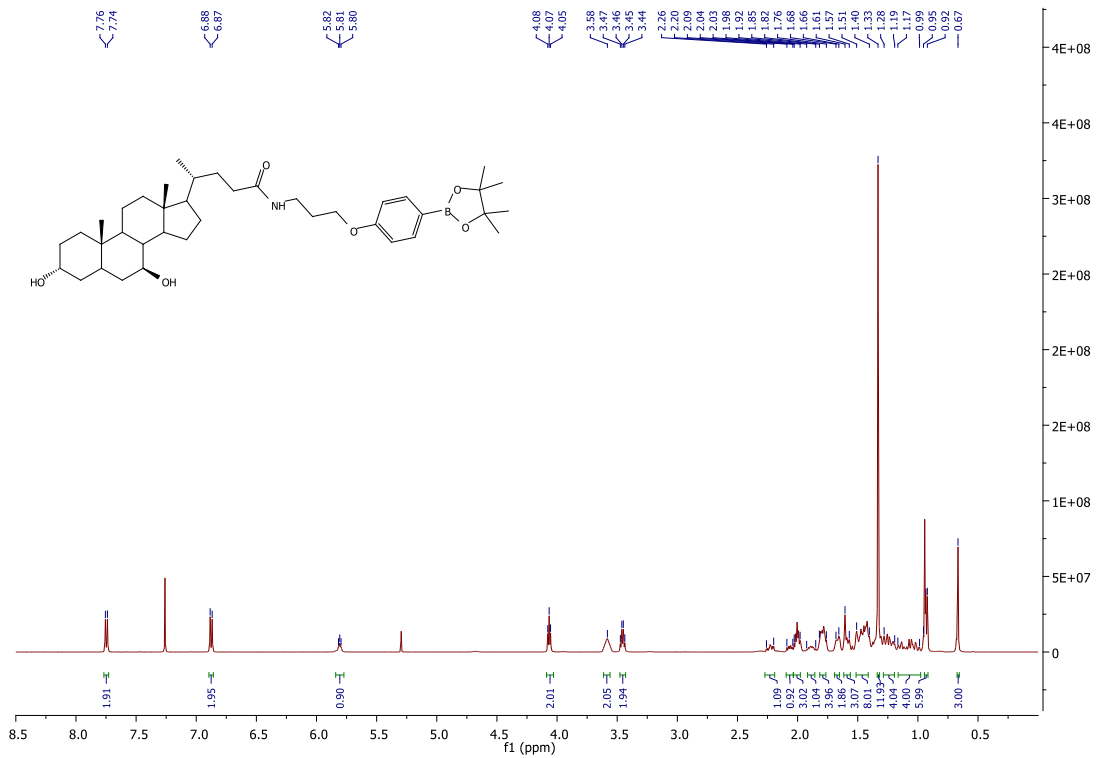

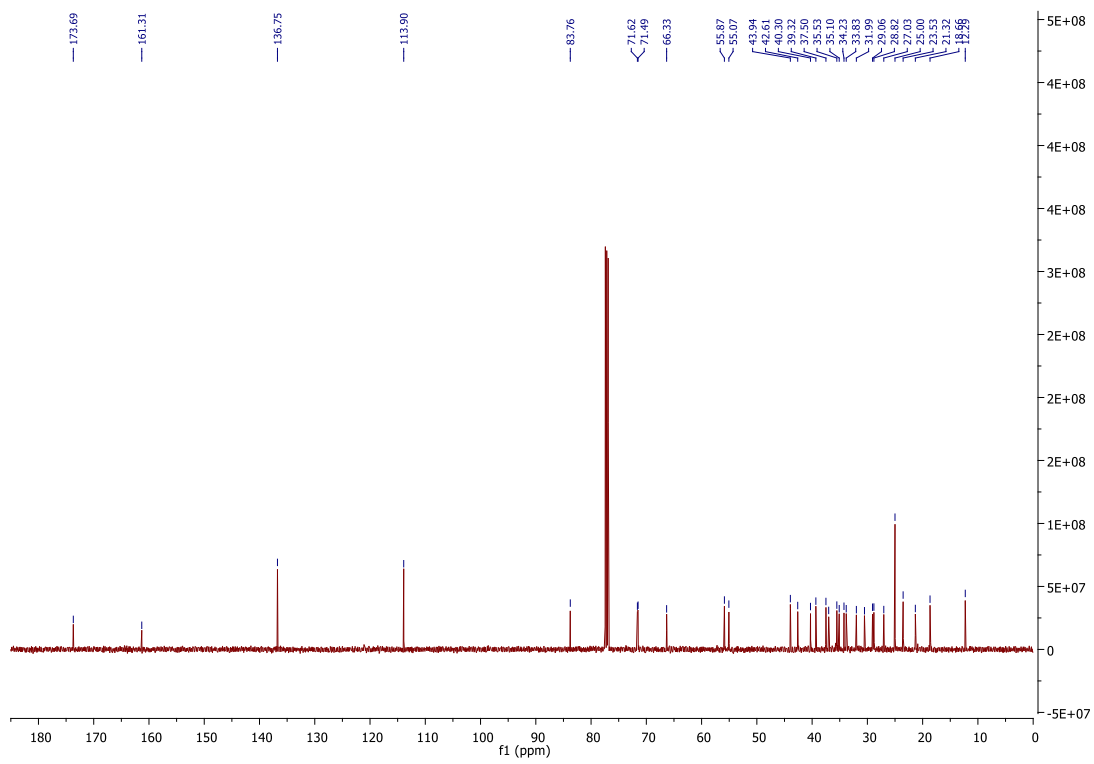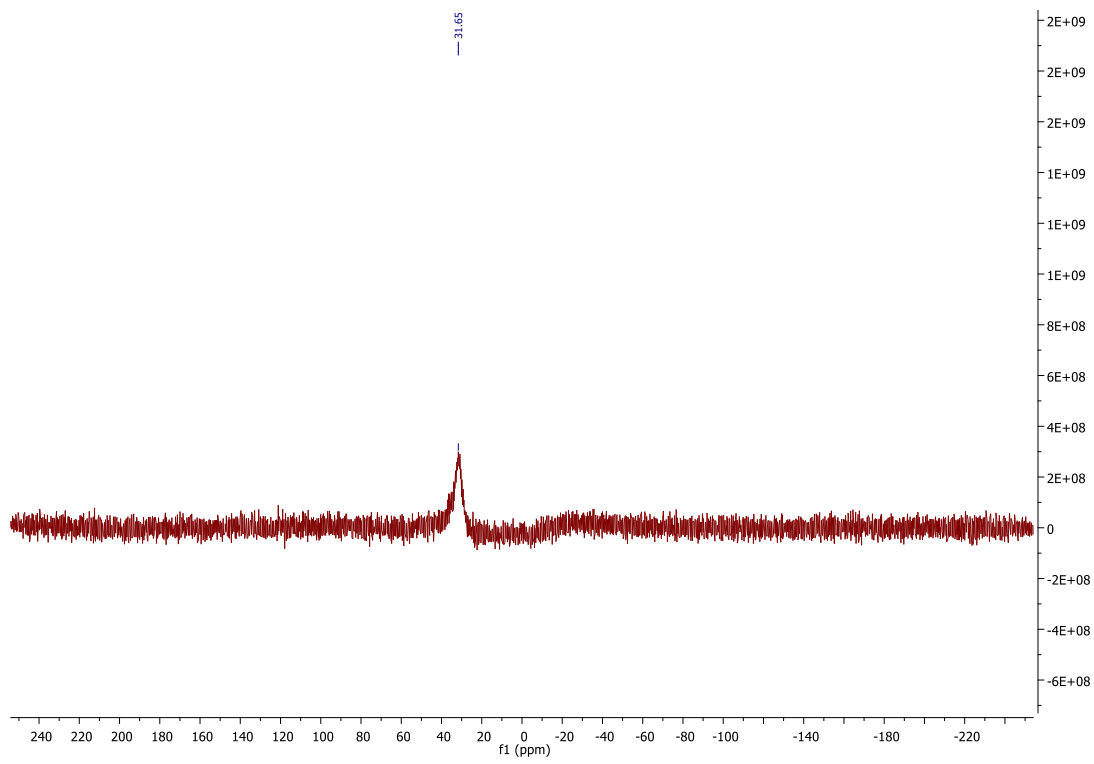

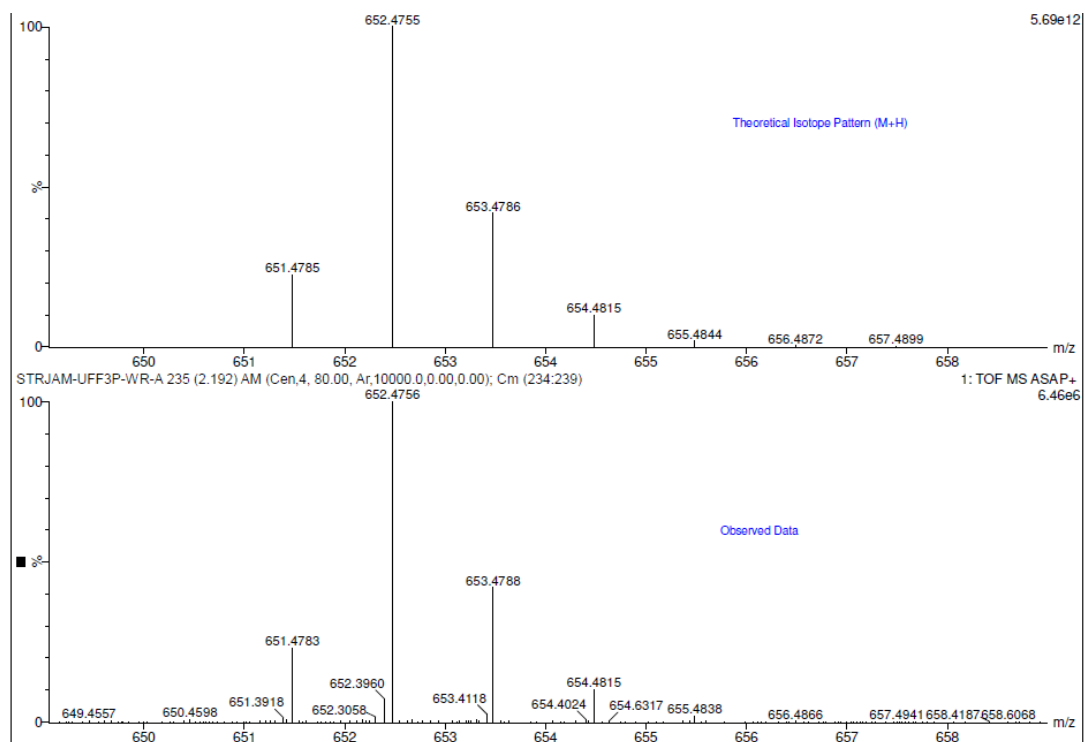

**Spectra for 17**

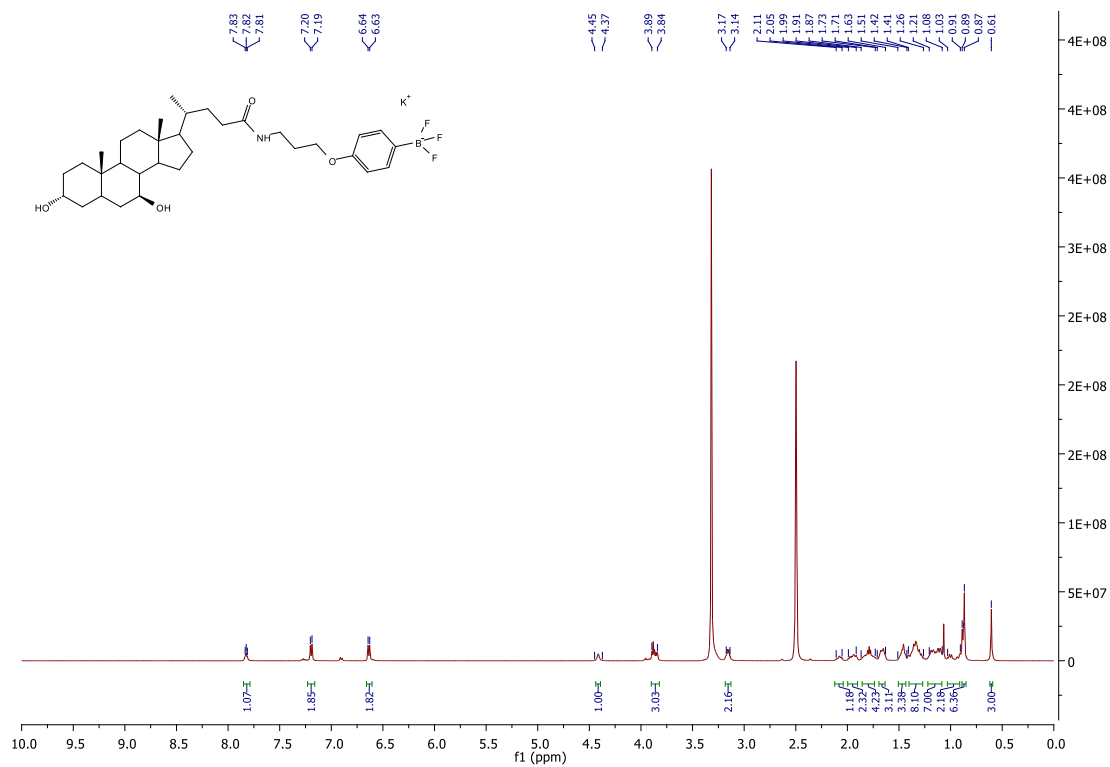

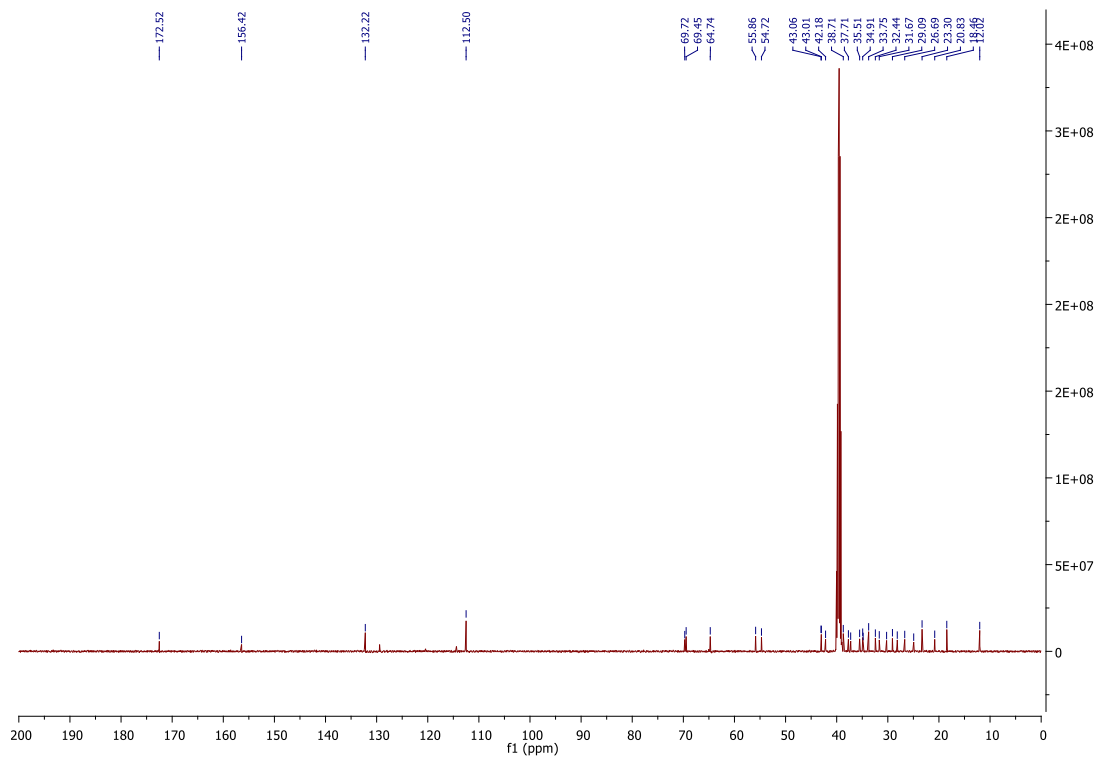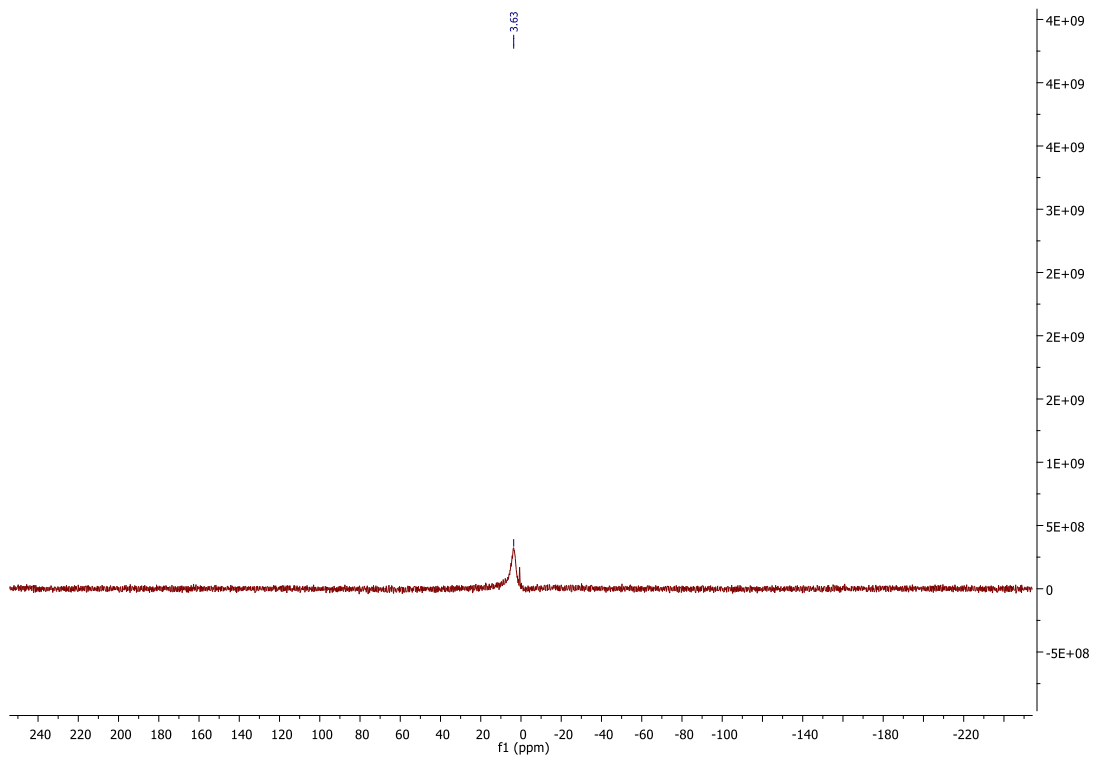

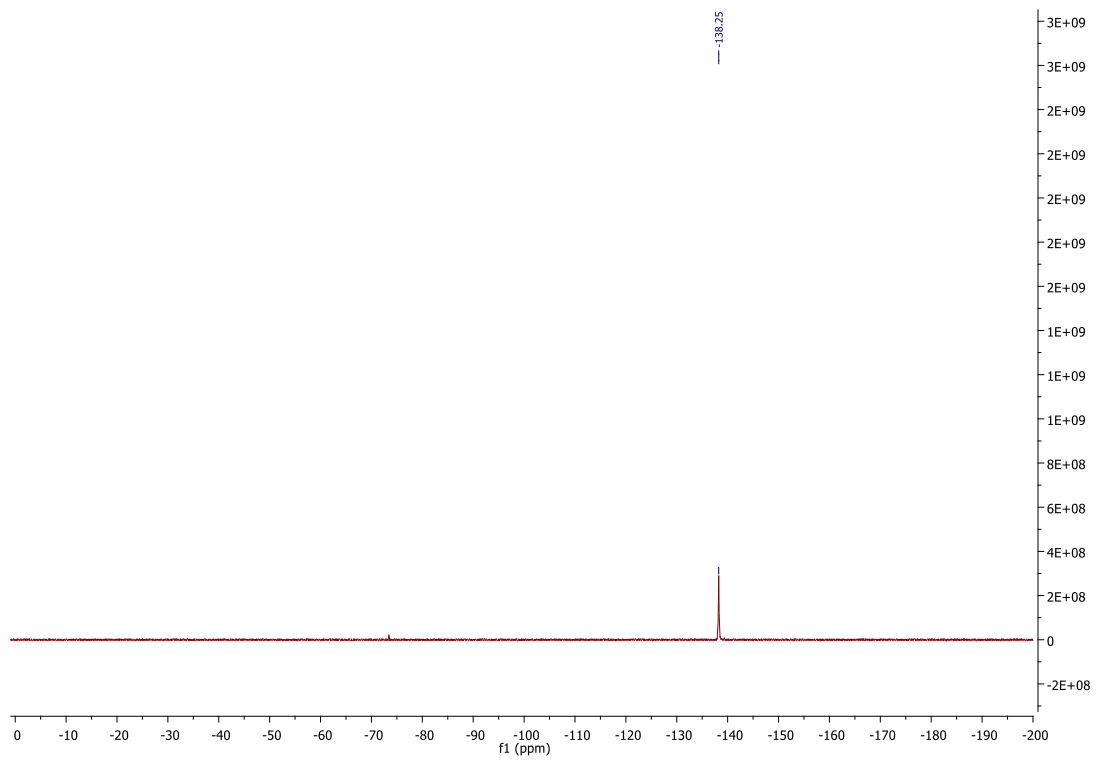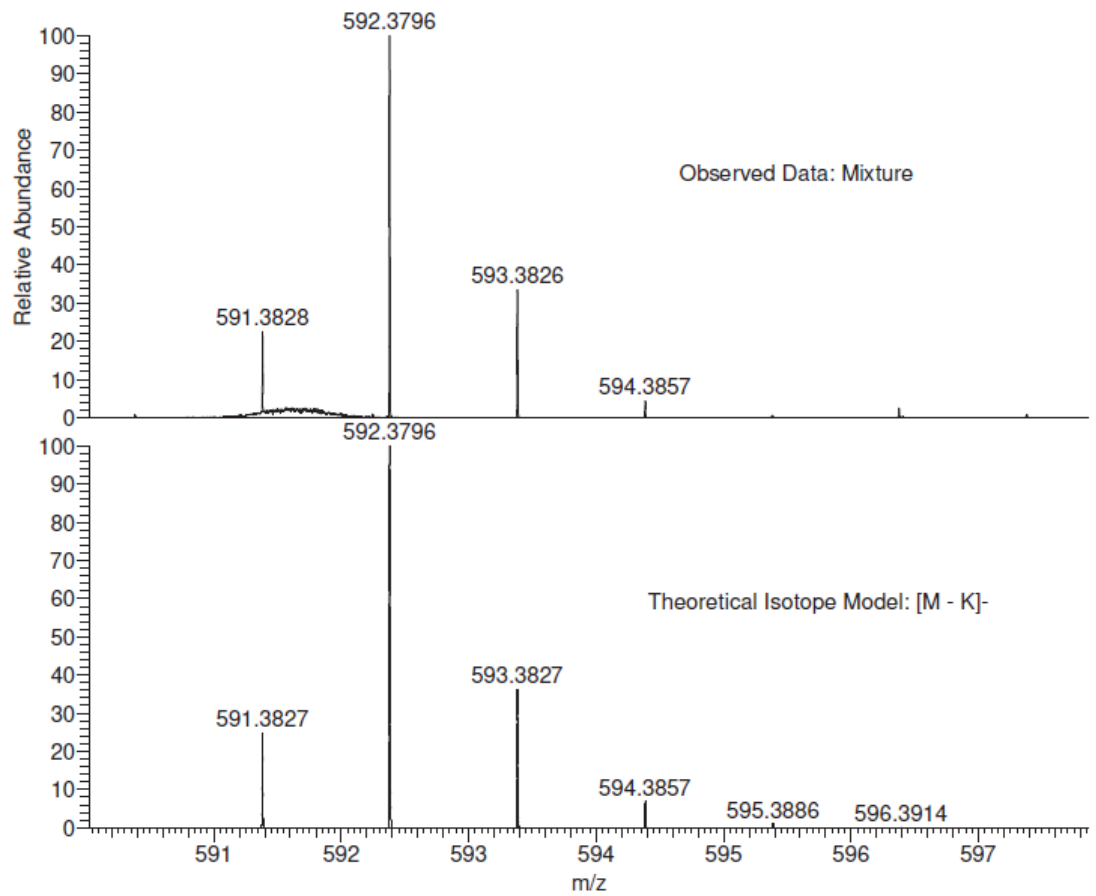

# Spectra for 18

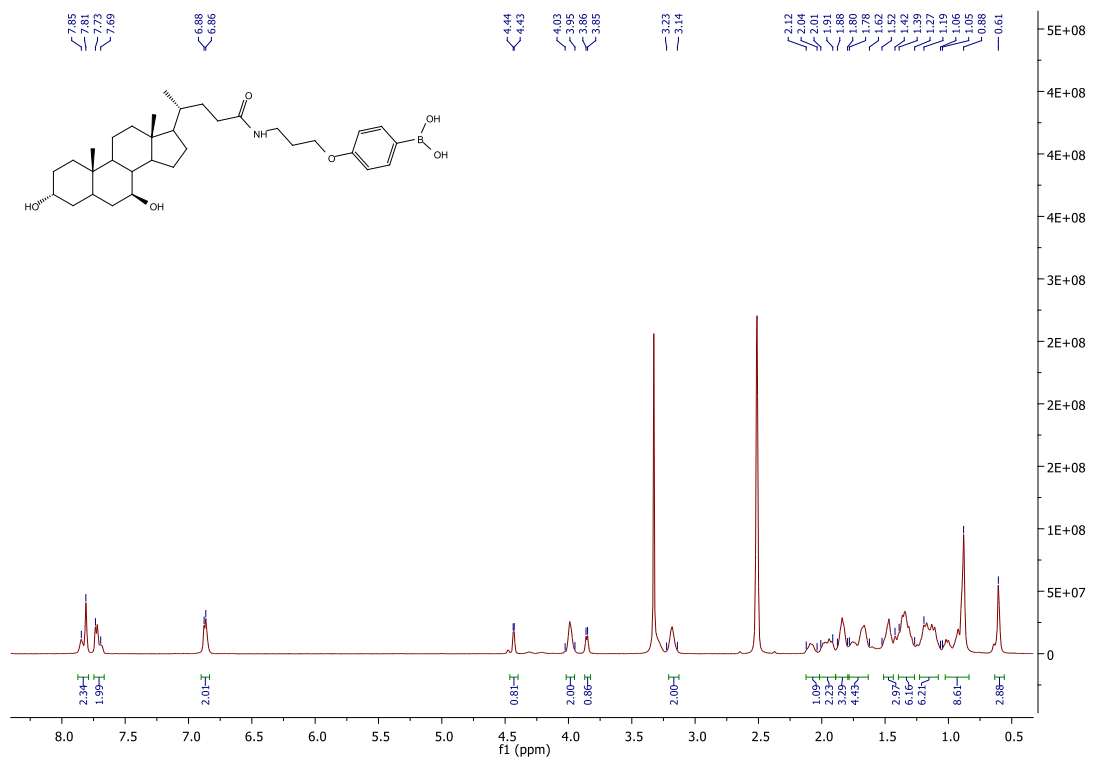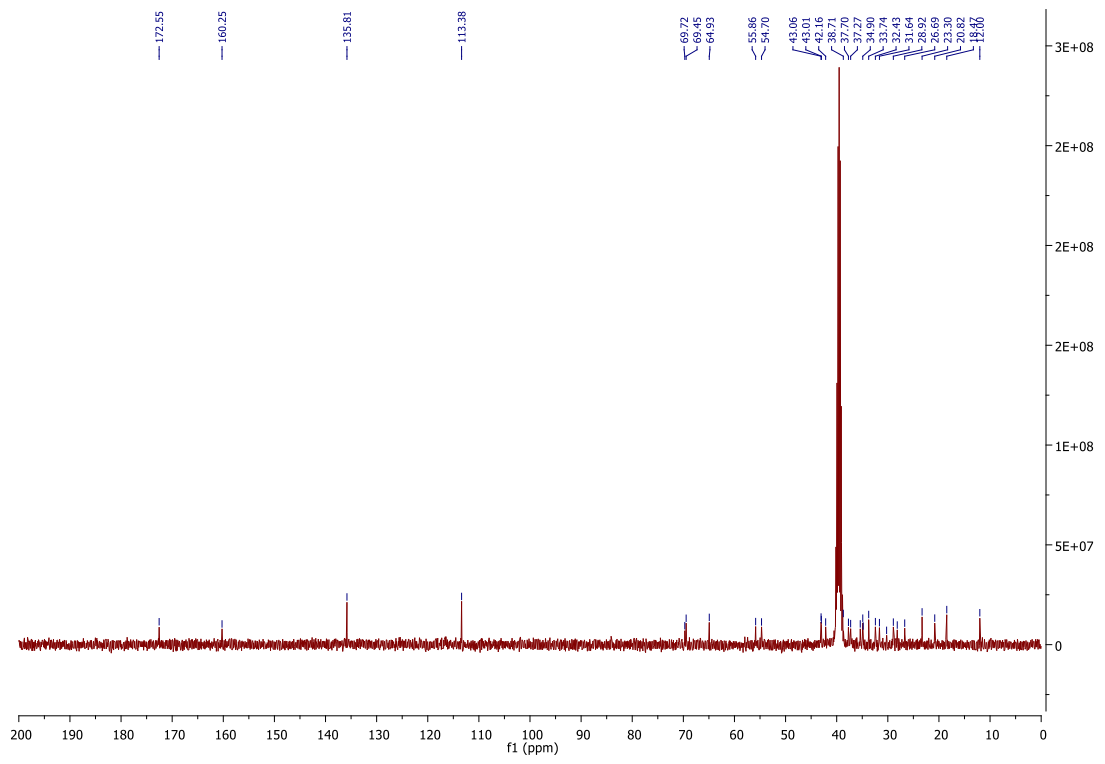

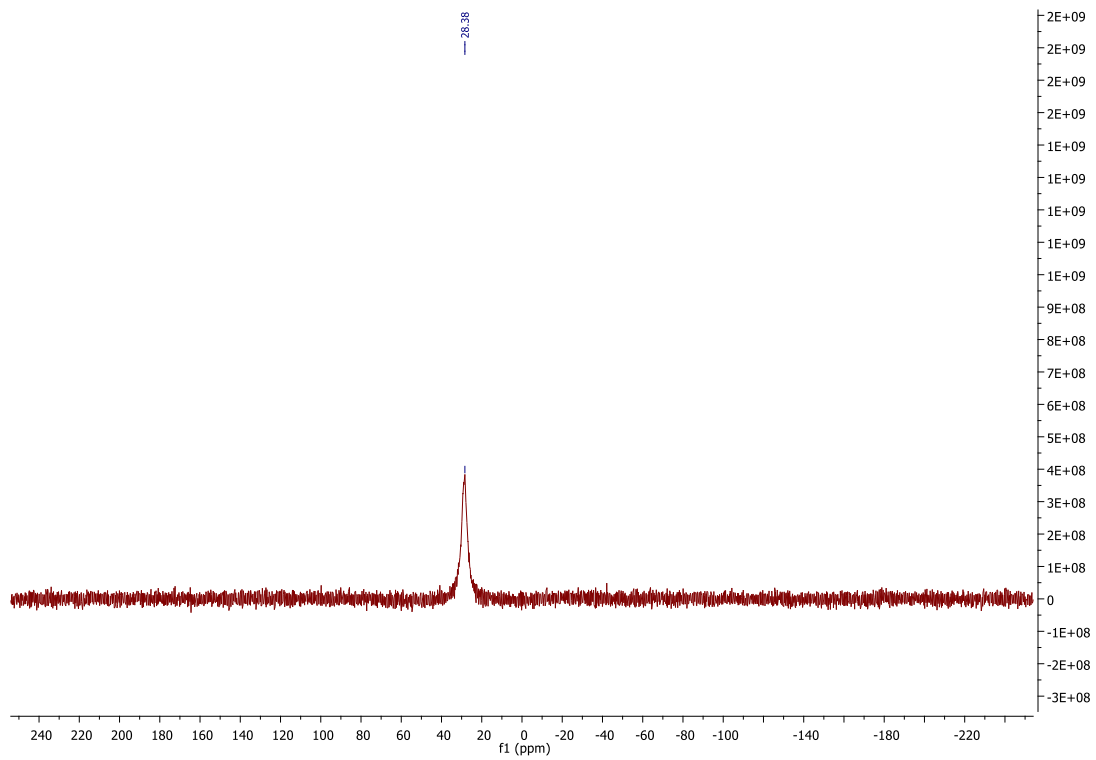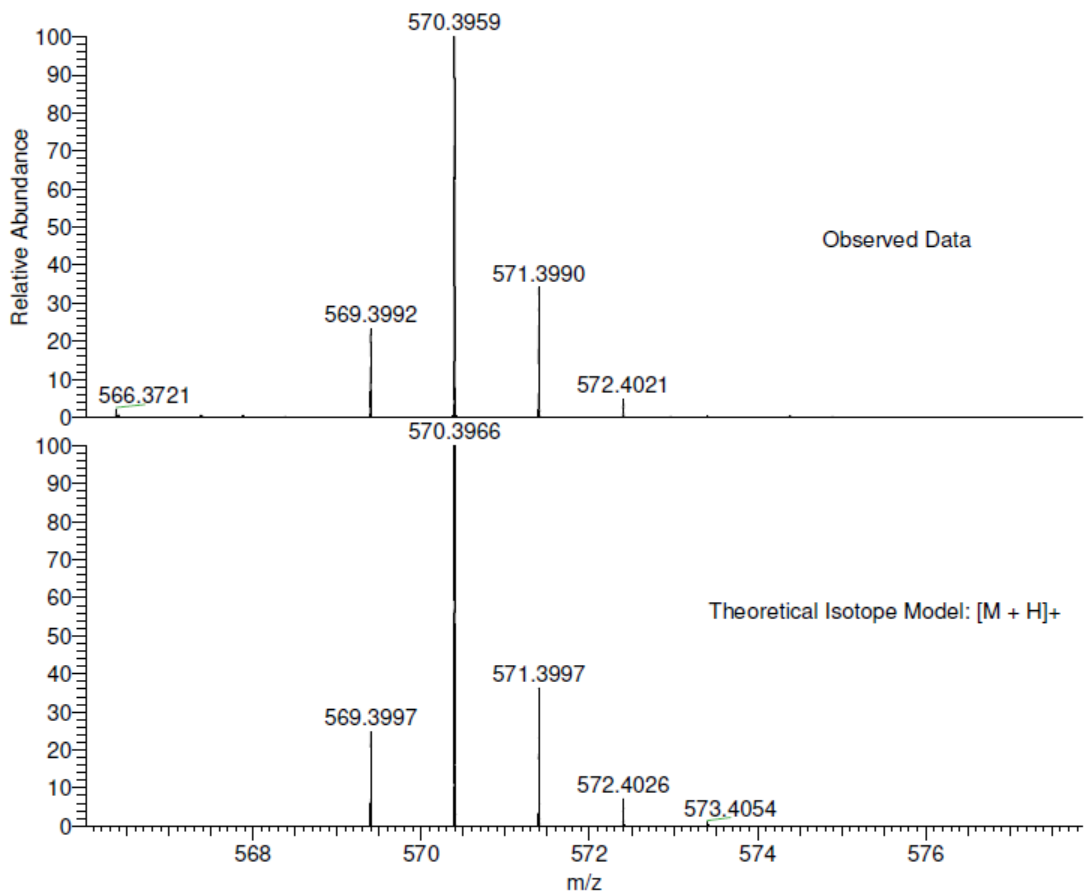

# Spectra for 19

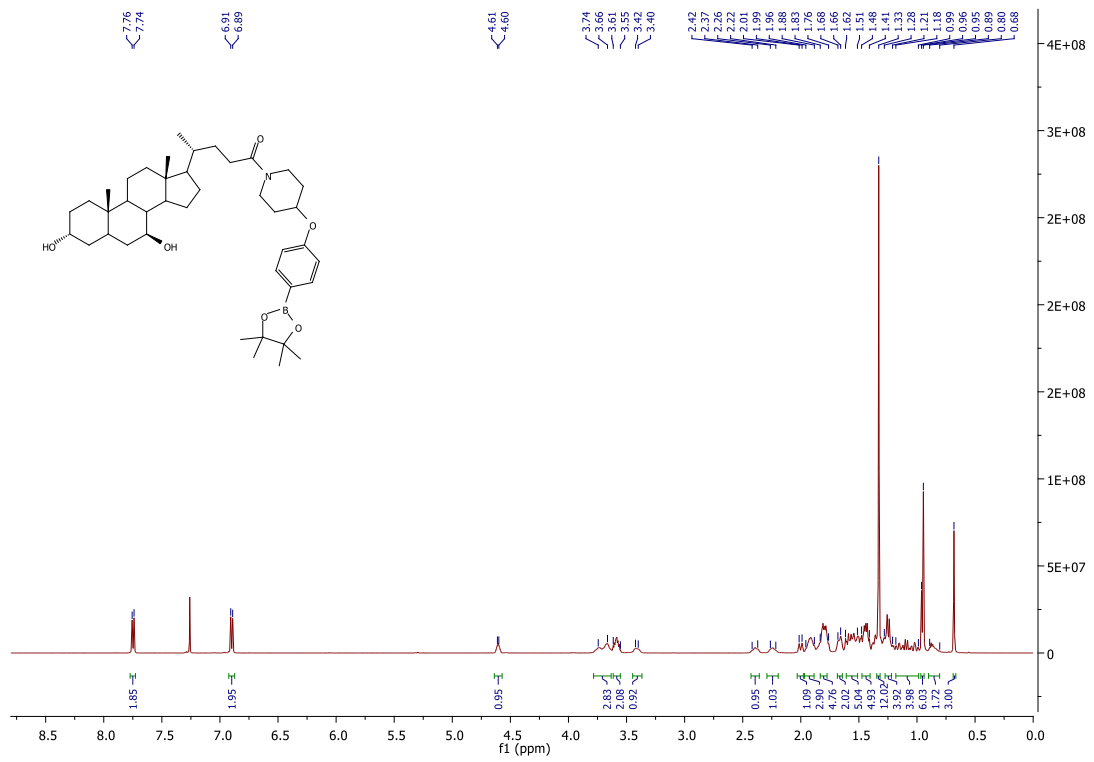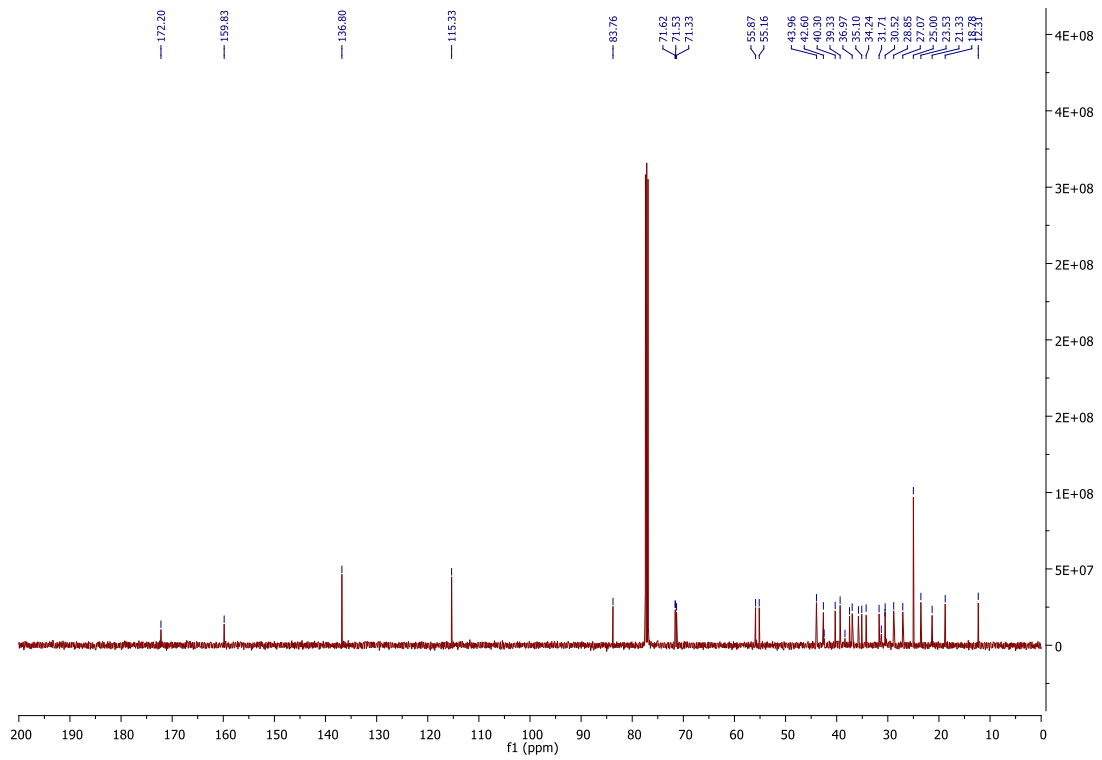



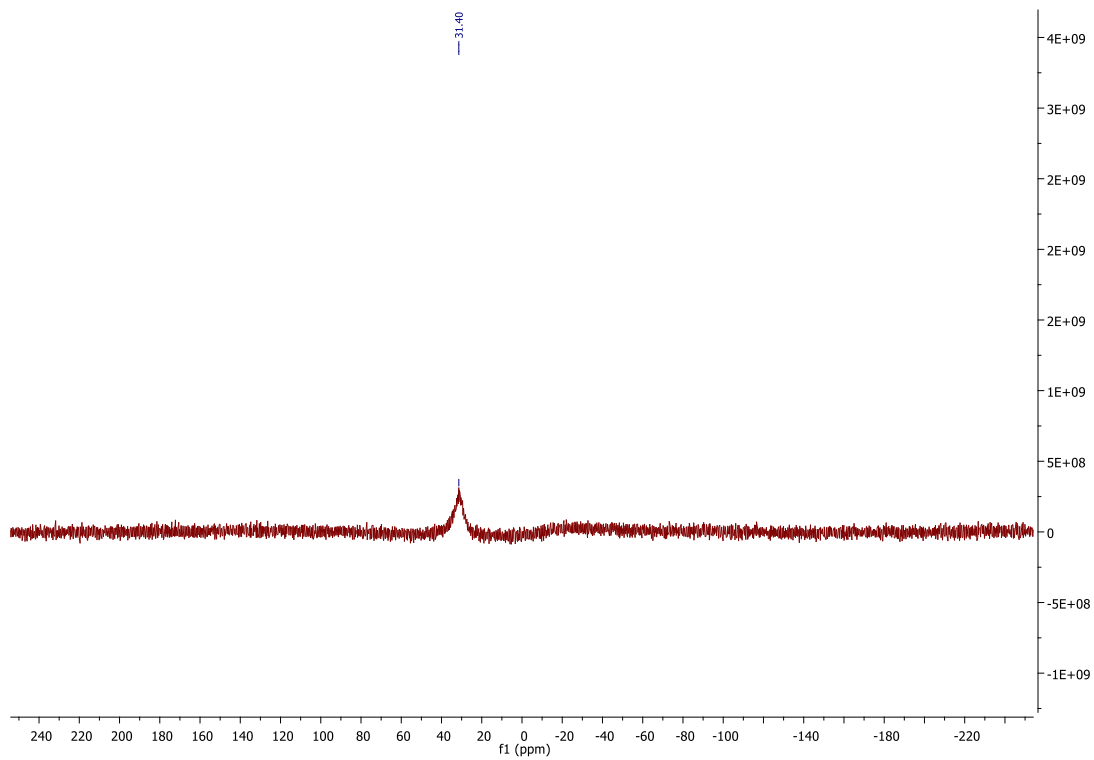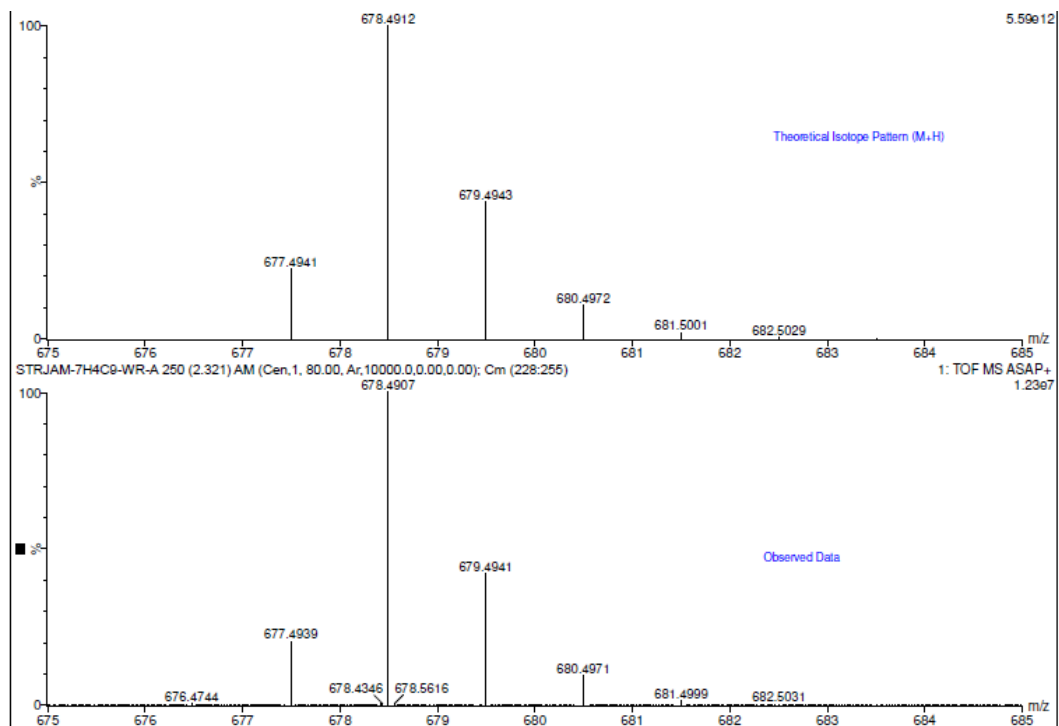

# Spectra for 20

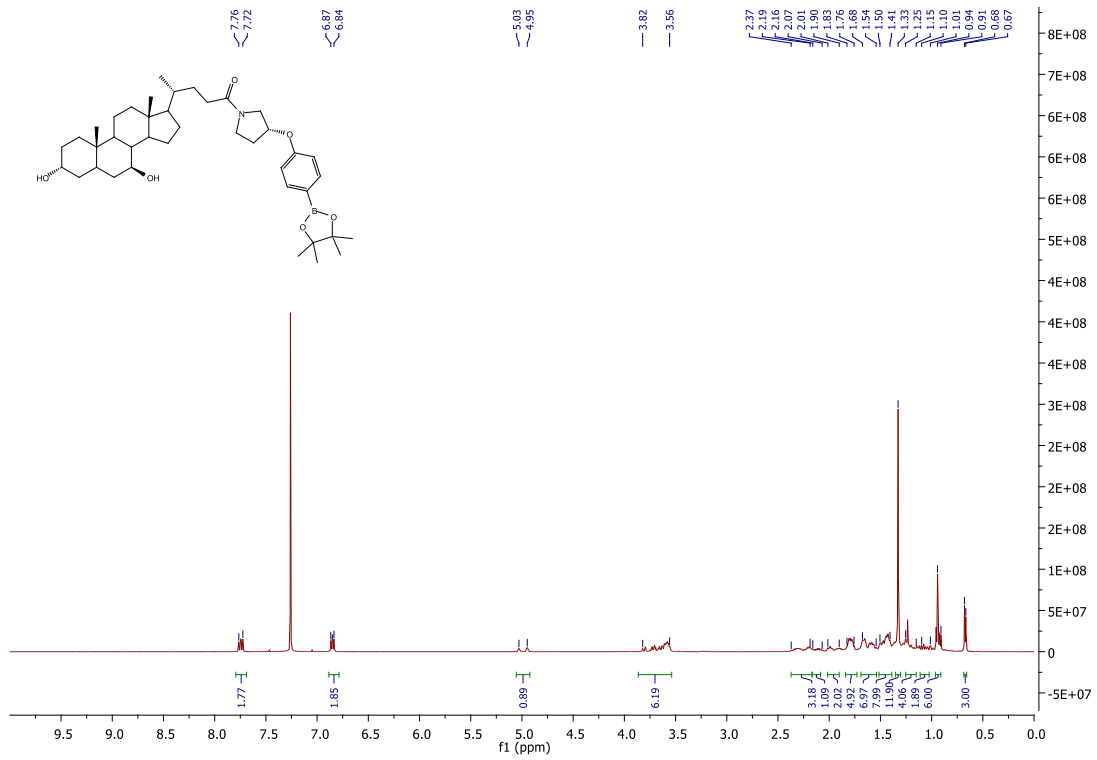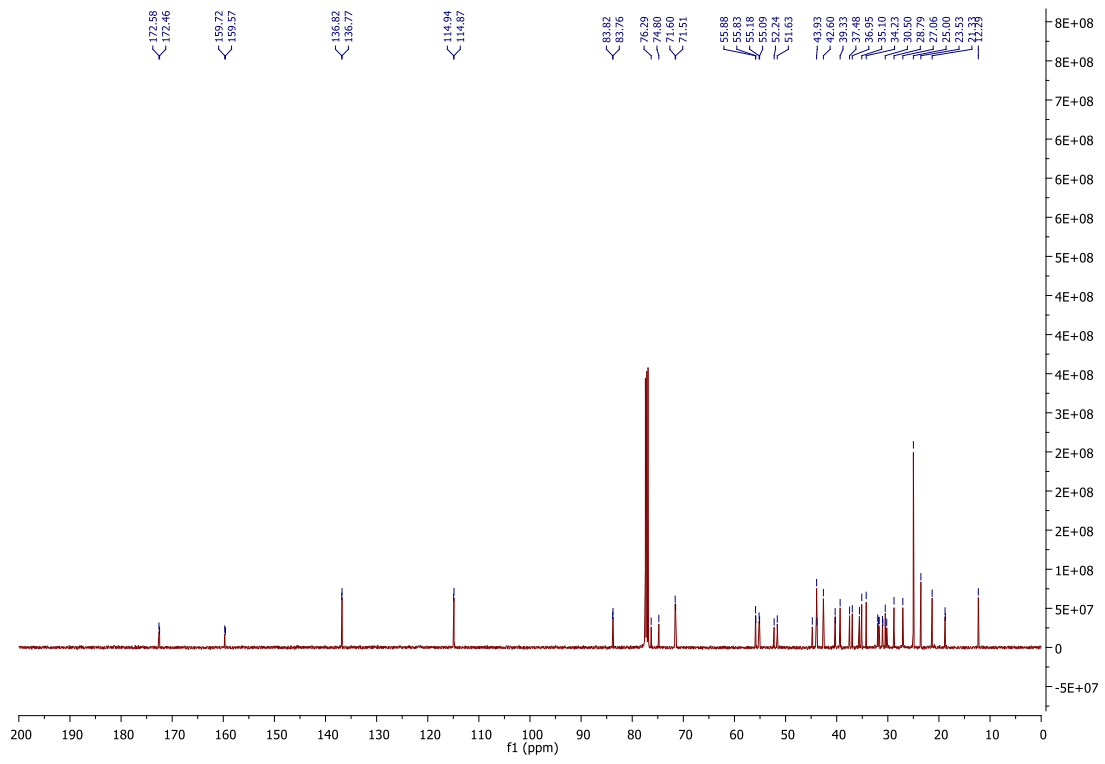

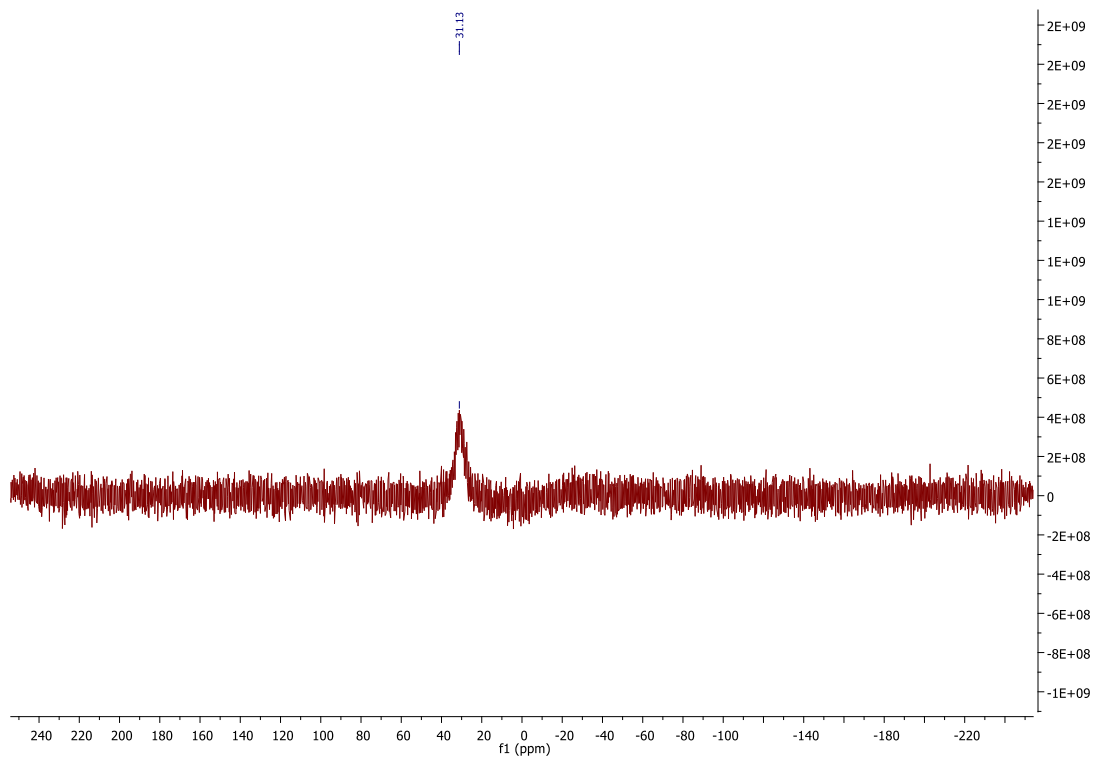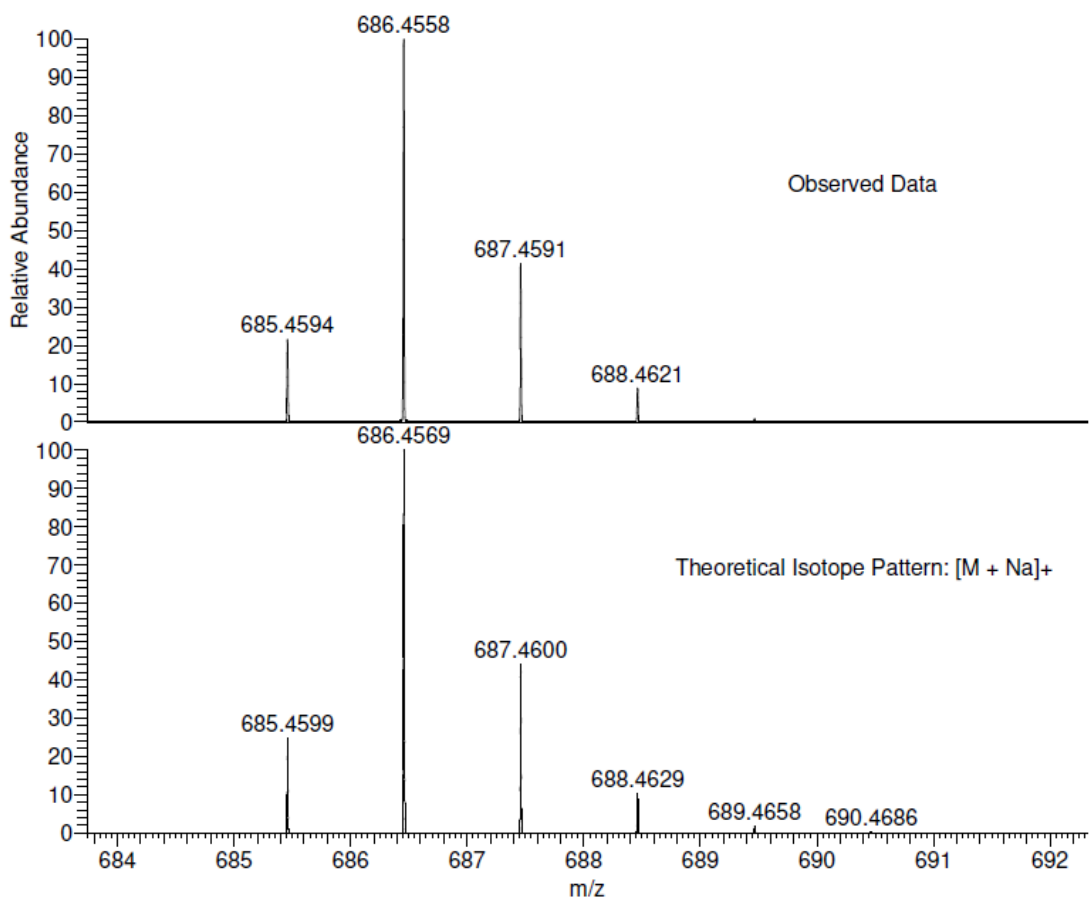

# Spectra for 21

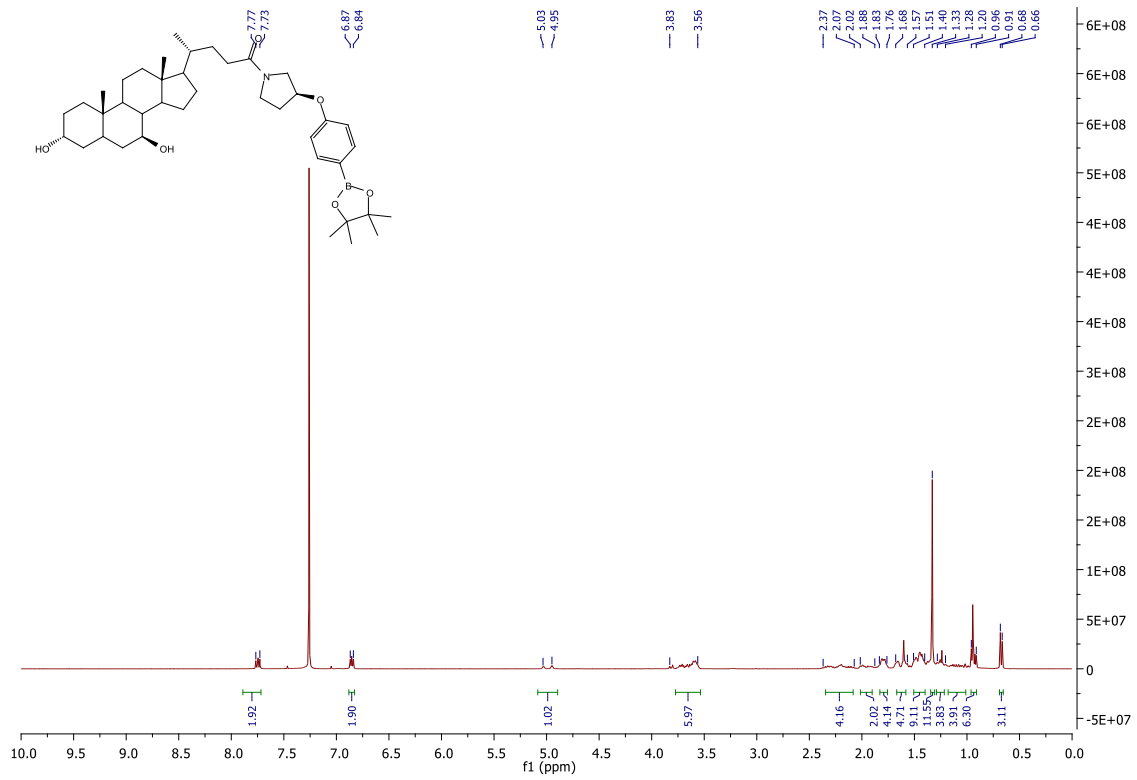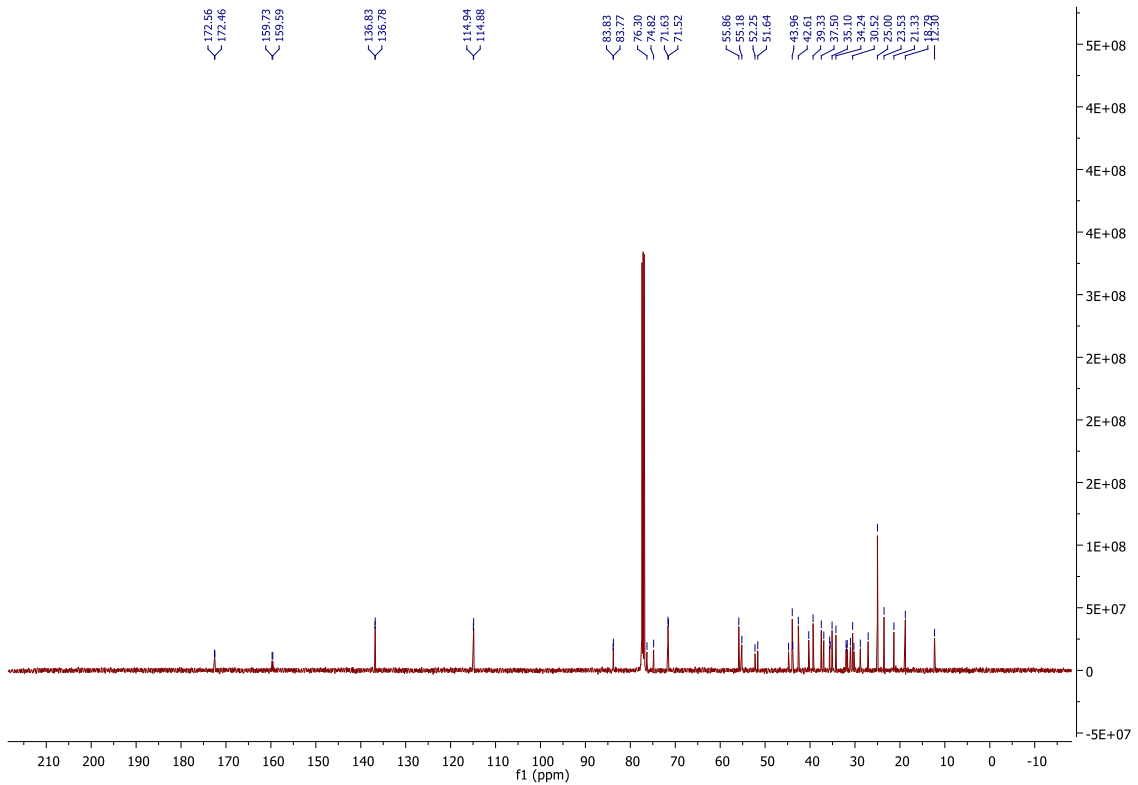

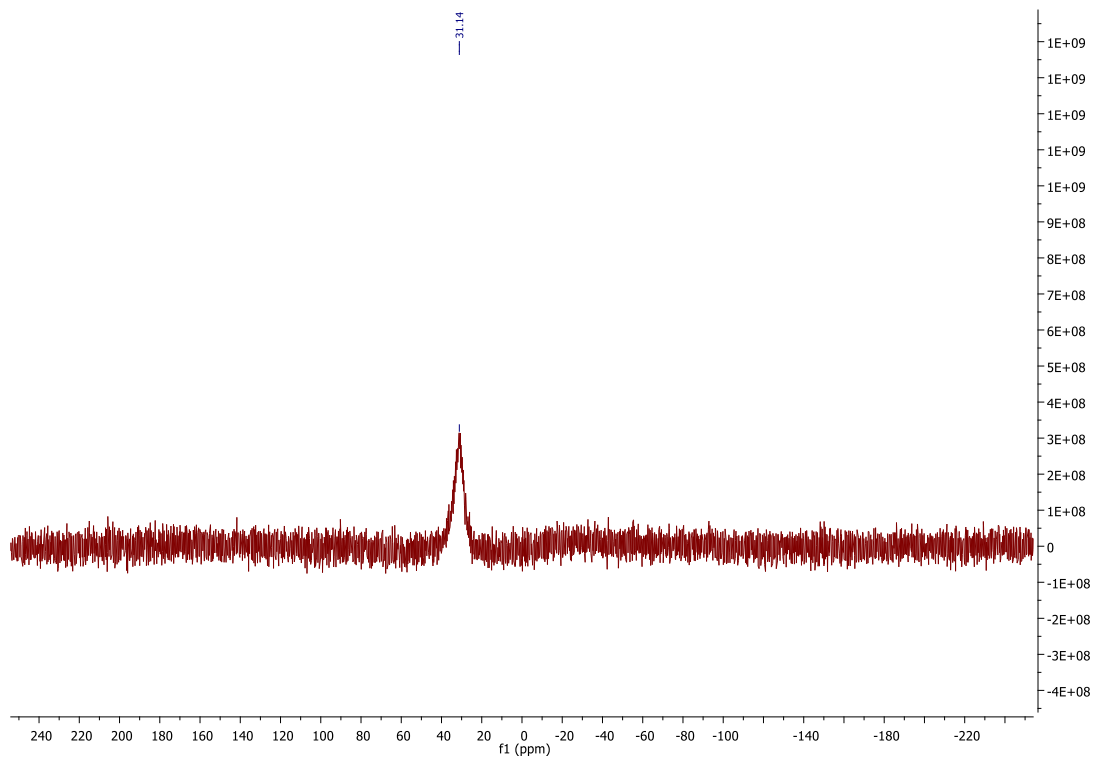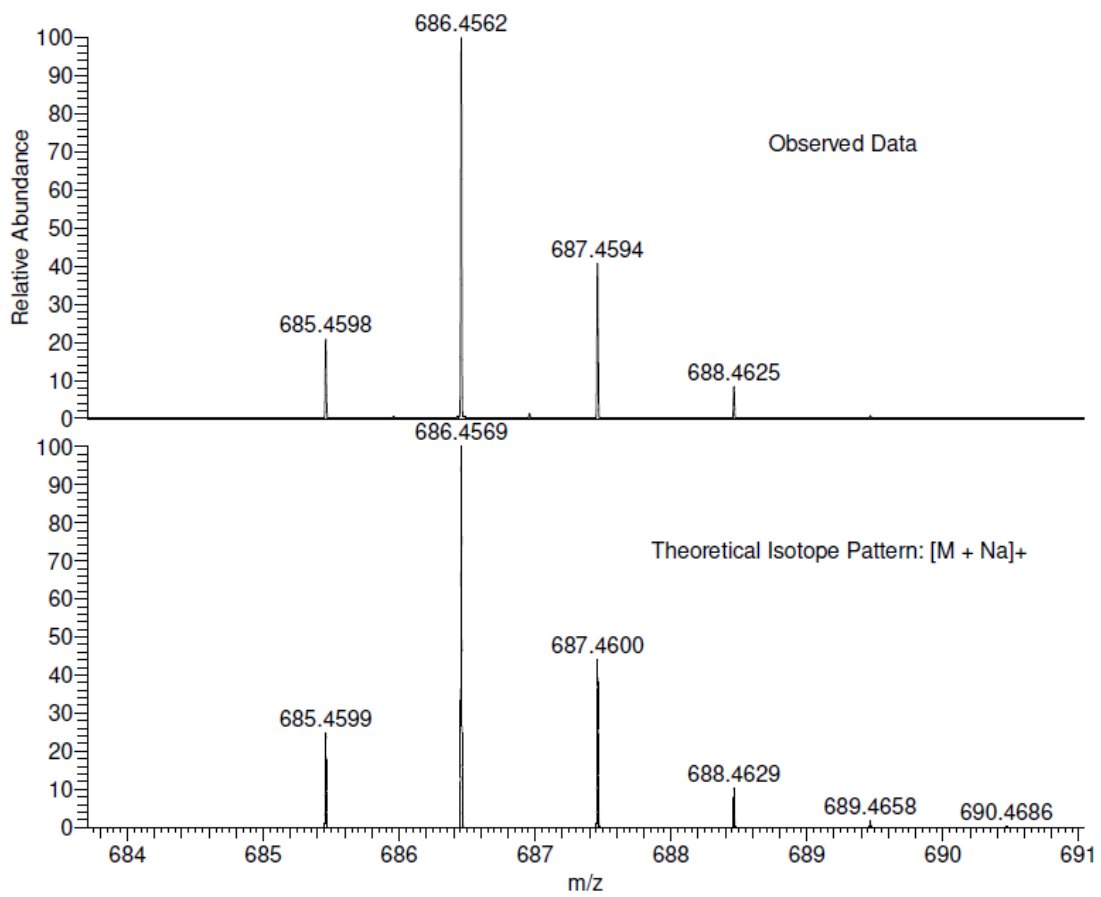

# Spectra for 22

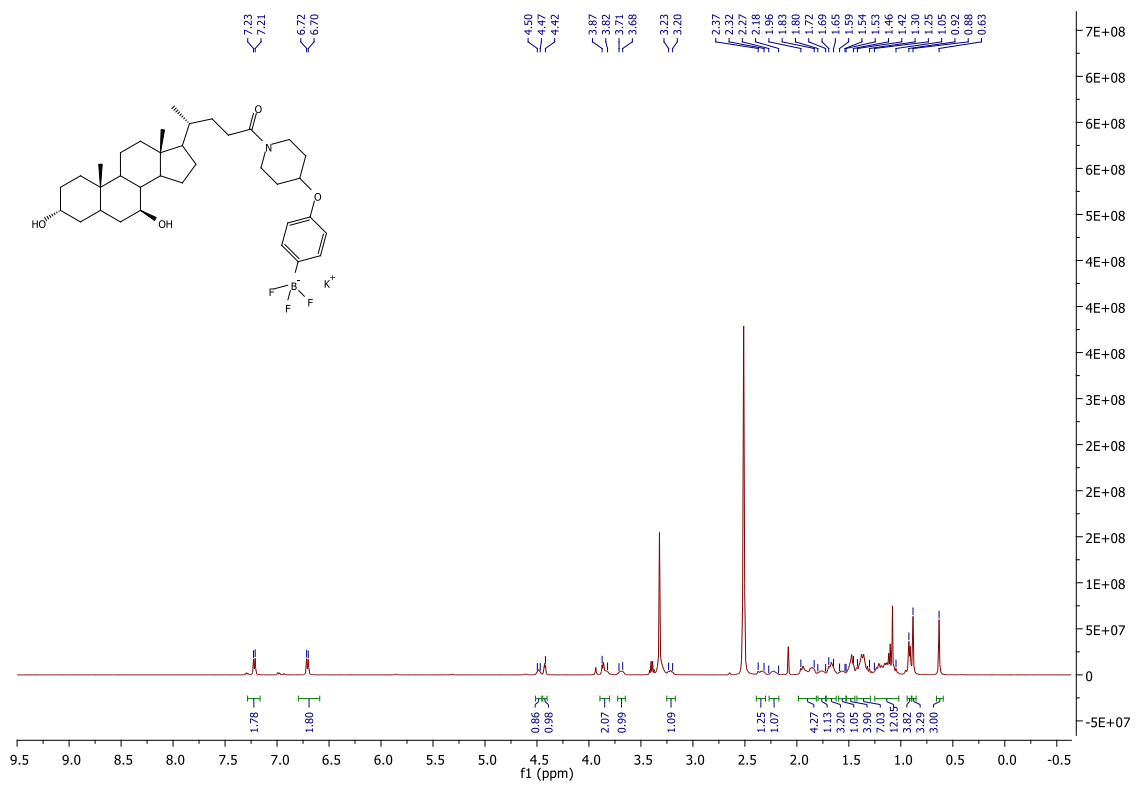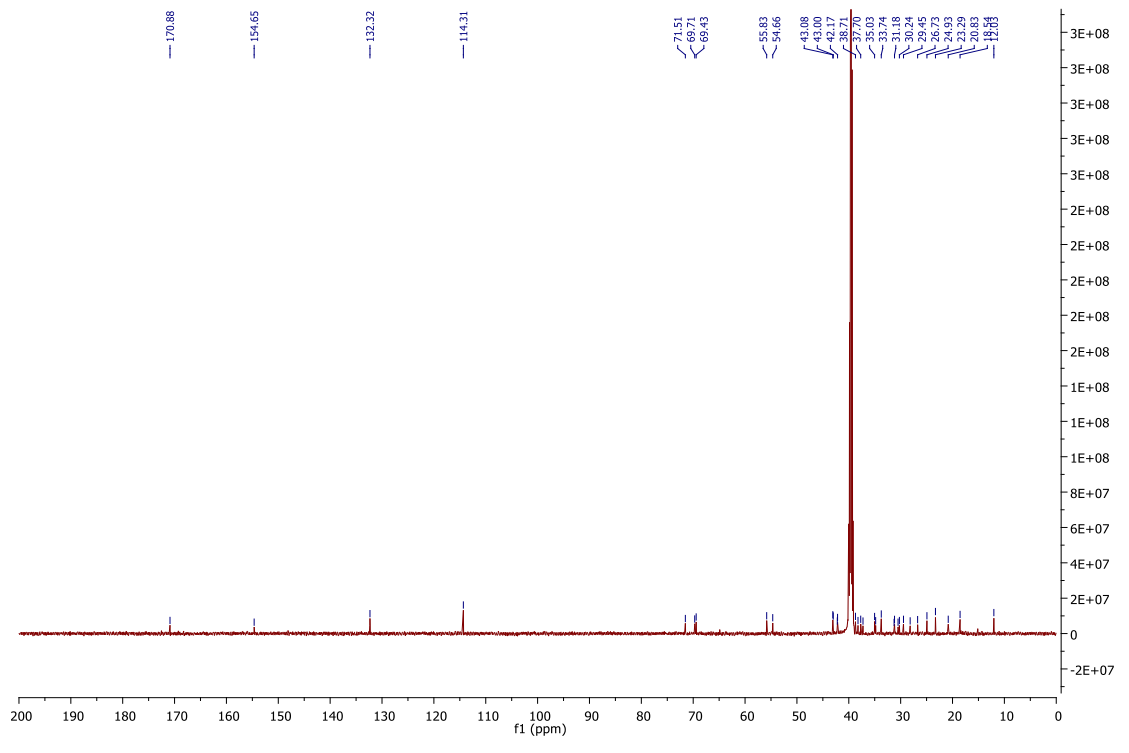

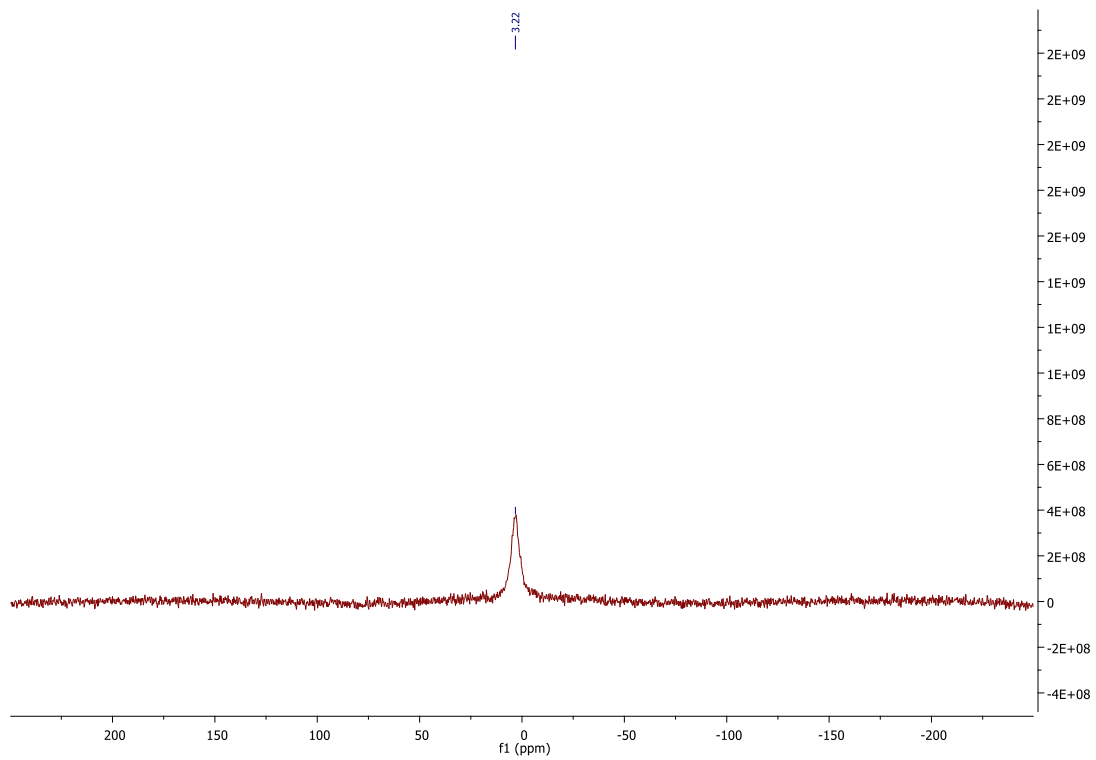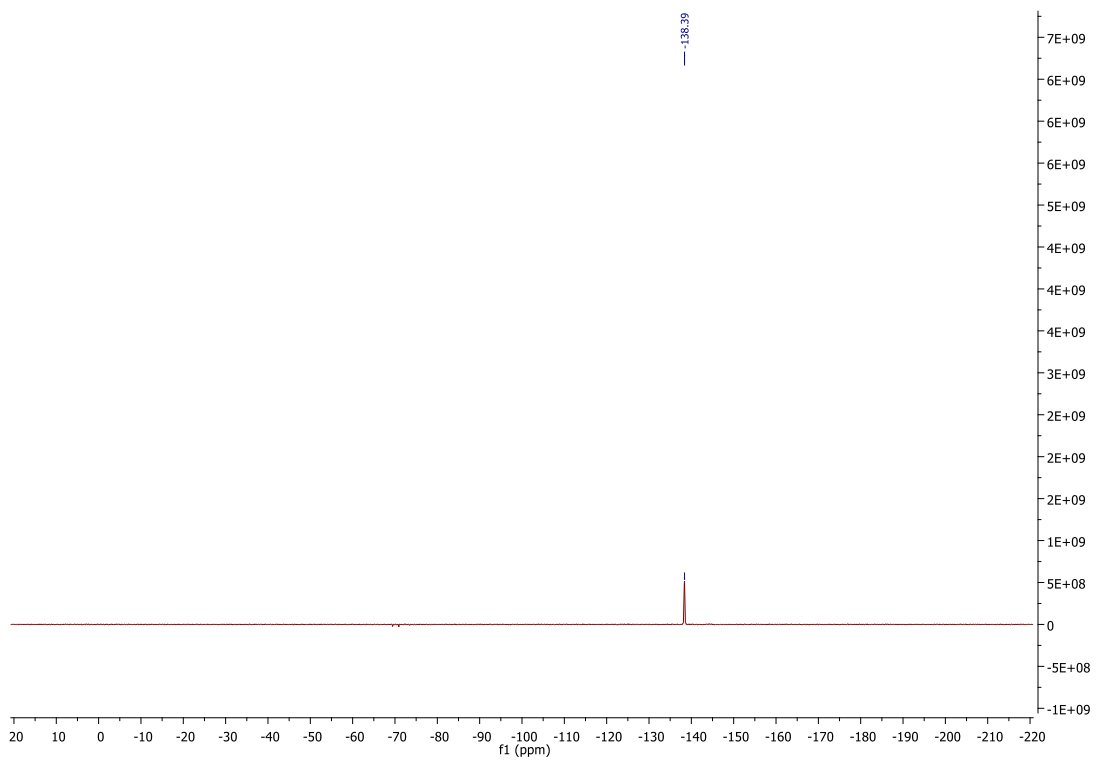

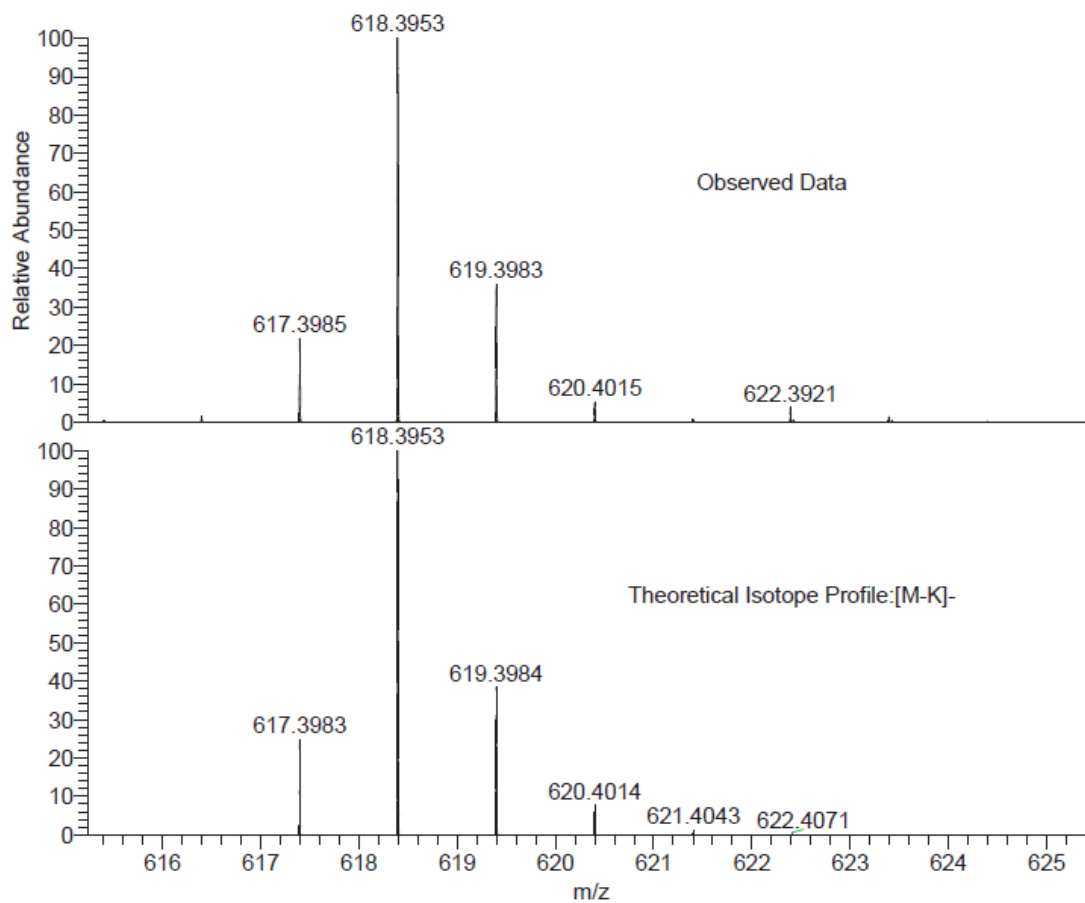





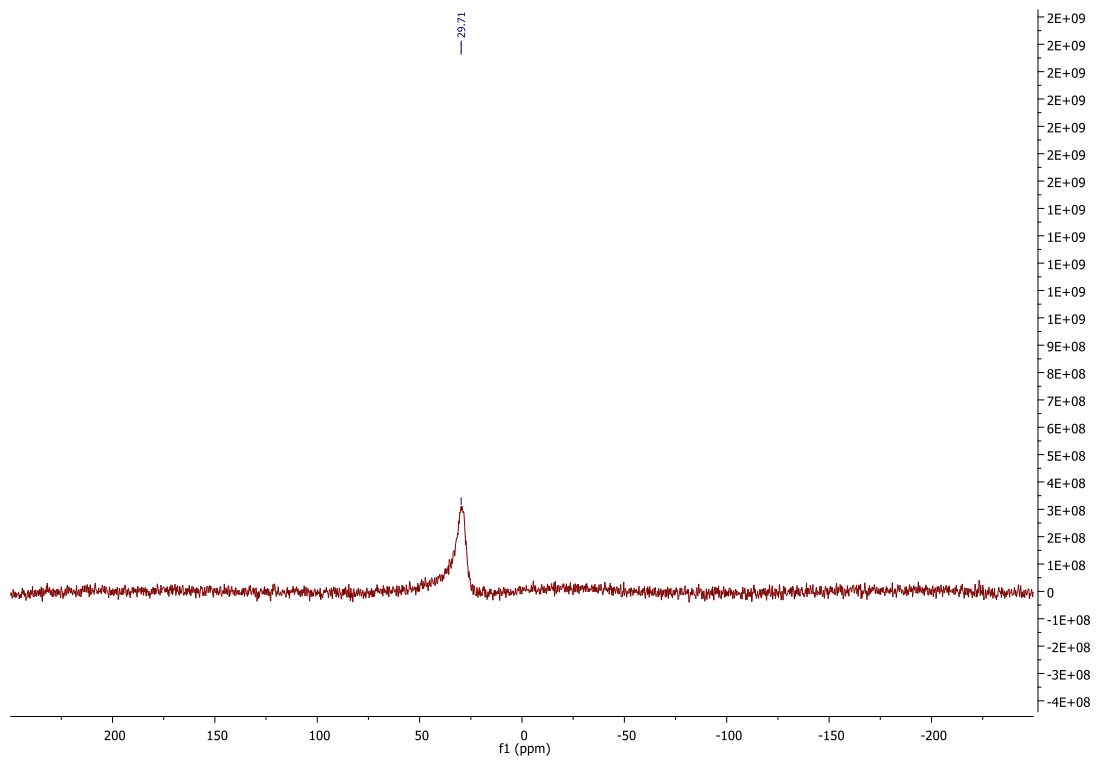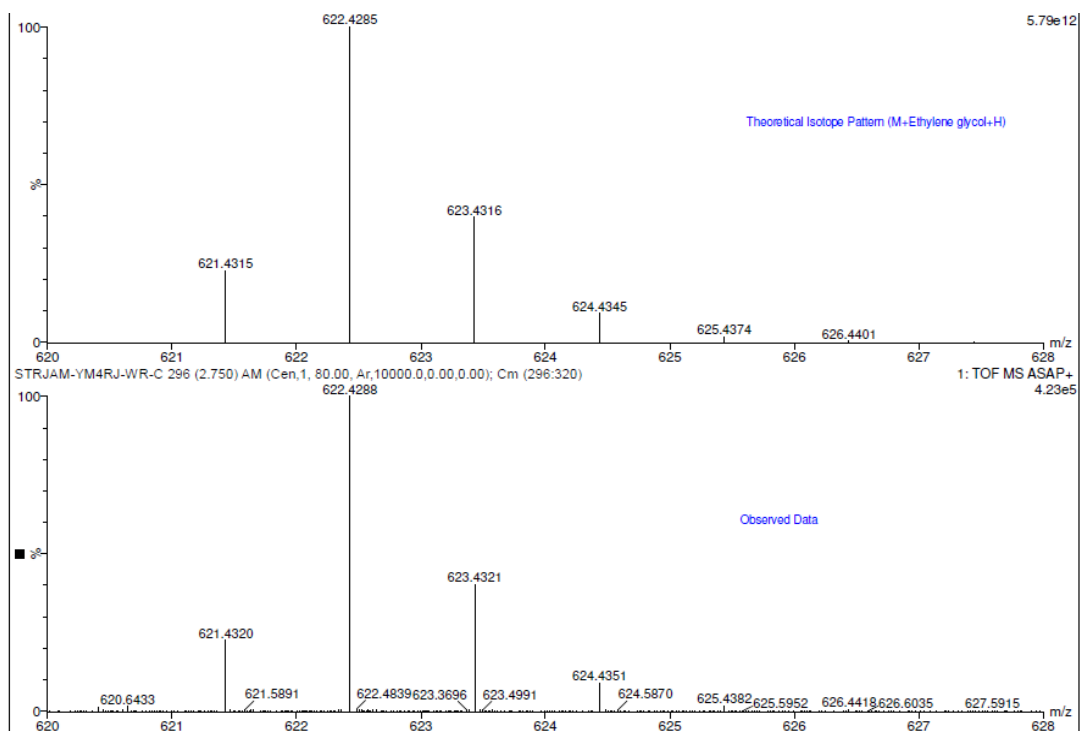

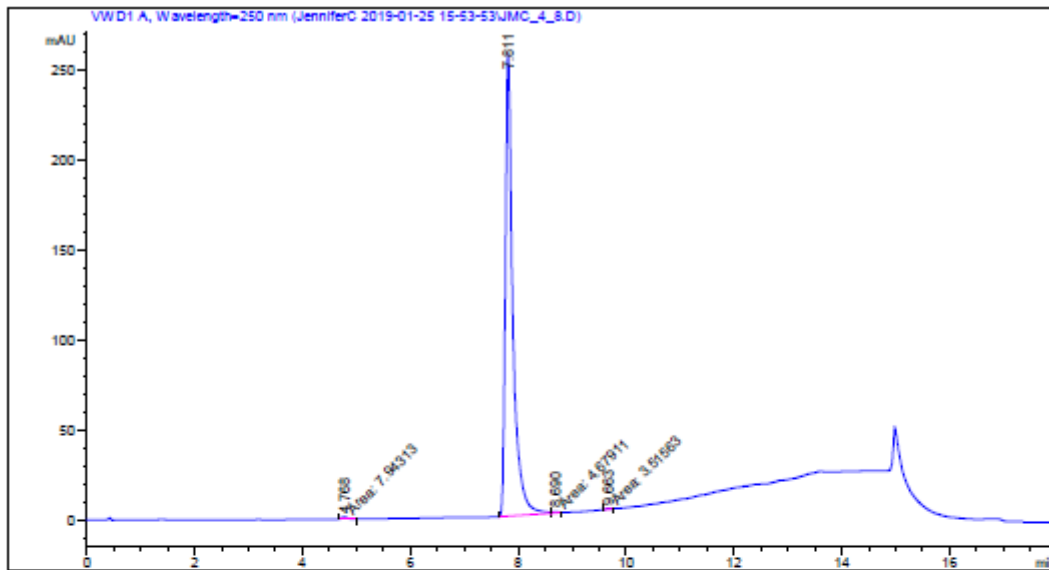

=====  
 Area Percent Report  
 =====

Sorted By : Signal  
 Multiplier : 1.0000  
 Dilution : 1.0000  
 Use Multiplier & Dilution Factor with ISTDs

Signal 1: VWD1 A, Wavelength=250 nm

| Peak # | RetTime [min] | Type | Width [min] | Area [mAU*s] | Height [mAU] | Area %  |
|--------|---------------|------|-------------|--------------|--------------|---------|
| 1      | 4.768         | MM   | 0.1064      | 7.94313      | 1.24405      | 0.3166  |
| 2      | 7.811         | BV   | 0.1396      | 2492.83911   | 256.41290    | 99.3568 |
| 3      | 8.690         | MM   | 0.1307      | 4.67911      | 5.96480e-1   | 0.1865  |
| 4      | 9.663         | MM   | 0.1012      | 3.51563      | 5.78959e-1   | 0.1401  |

Totals : 2508.97698 258.83239

=====  
 \*\*\* End of Report \*\*\*

## 5. References

1. M. Bozdog, M. Pinard, F. Carta, E. Masini, A. Scozzafava, R. McKenna, C. T. Supuran. A Class of 4-Sulfamoylphenyl- $\omega$ -aminoalkyl Ethers with Effective Carbonic Anhydrase Inhibitory Action and Antiglaucoma Effects. *J. Med. Chem.* **2014**, *57*, 9673–9686.
2. A. J. J. Lennox, G. C. Lloyd-Jones. Preparation of Organotrifluoroborate Salts: Precipitation-Driven Equilibrium under Non-Etching Conditions. *Angew. Chemie Int. Ed.* **2012**, *51*, 9385–9388.
